# Supplementary material for: Organocatalytic chemoselective asymmetric N-allylic alkylation of enamides
Source: Royal Society of Chemistry journal article supplement (doi:10.1039/c0cc05616b), 2011-01-01
Supplement: c0cc05616b.pdf [file c0cc05616b.pdf]

## Organocatalytic Chemoselective Asymmetric *N*-Allylic Alkylation of Enamides

Ji-Rong Huang,<sup>a</sup> Hai-Lei Cui,<sup>a</sup> Jie Lei,<sup>a</sup> Xun-Hao Sun,<sup>a</sup> and Ying-Chun Chen<sup>\*a,b</sup>

<sup>a</sup> *Key Laboratory of Drug-Targeting and Drug Delivery System of the Education Ministry, Department of Medicinal Chemistry, West China School of Pharmacy, Sichuan University, Chengdu 610041, China,* <sup>b</sup> *State Key Laboratory of Biotherapy, West China Hospital, Sichuan University, Chengdu 610041, China.*

E-mail: ycchenhuaxi@yahoo.com.cn

### Supplementary Information

#### Table of Contents

1. General Methods
2. General procedure for asymmetric *N*-allylic alkylation reaction
3. General procedure for one-pot *N*-alkylation–aza-Cope rearrangement
4. Transformation of *N*-allylic alkylation product
5. Crystal data of enantiopure 3t
6. NMR spectra and HPLC chromatograms

## 1. General Methods:

NMR spectra were recorded with tetramethylsilane as the internal standard. TLC was performed on glass-backed silica plates. Column chromatography was performed using silica gel (200-300 mesh) eluting with ethyl acetate and petroleum ether (EtOAc/PE).  $^1\text{H}$  NMR spectra were recorded at 400 MHz (Varian) and  $^{13}\text{C}$  NMR spectra were recorded at 100 or 50 MHz (Varian). Chemical shifts are reported in ppm downfield from  $\text{CDCl}_3$  ( $\delta = 7.27$  ppm) for  $^1\text{H}$  NMR and relative to the central  $\text{CDCl}_3$  resonance ( $\delta = 77.0$  ppm) for  $^{13}\text{C}$  NMR spectroscopy. Coupling constants are given in Hz. Optical rotations were measured at 589 nm at 20 °C. Enantiomeric excess was determined by HPLC analysis on Chiralpak AS, AD and Chiralcel OD columns in comparison with authentic racemic samples. Toluene was distilled from  $\text{CaH}_2$ . All other chemicals were used without purification as commercially available. Cinchona alkaloid catalysts  $(\text{DHQD})_2\text{PHAL}$ ,  $(\text{DHQD})_2\text{PYR}$ ,  $(\text{DHQD})_2\text{AQN}$  and  $(\text{DHQ})_2\text{AQN}$  were purchased from Aldrich Chemical Company. Morita–Baylis–Hillman carbonates were prepared according to the literature.<sup>1</sup> Enamides **1a**<sup>2</sup>, **1d–1k**<sup>2</sup>, **1b–1c**<sup>3</sup>, **1h**<sup>4</sup> and **1i**<sup>5</sup> were prepared according to the reported methods.

(1) J. Feng, X. Lu, A. Kong and X. Han, *Tetrahedron*, 2007, **63**, 6035.

(2) C. Sun and S. M. Weinreb, *Synthesis*, 2006, **21**, 3585.

(3) H. Kiyohara, R. Matsubara and S. Kobayashi, *Org. Lett.*, 2006, **8**, 5333.

(4) G. Zhu, Z. Chen and X. Zhang, *J. Org. Chem.*, 1999, **64**, 6907.

(5) B. S. Jursic, S. Sagiraju, D. K. Ancalade, T. Clark, E. D. Stevens, *Synth. Commun.*, 2007, **37**, 1709.

## 2. General procedure for asymmetric *N*-allylic alkylation reaction

To a solution of **1a** (32.2 mg, 0.2 mmol) and  $(\text{DHQD})_2\text{AQN}$  (8.6 mg, 5 mol%) in dry toluene (1.0 mL) was added **2a** (116.8 mg, 0.4 mmol). The reaction mixture was stirred at 50 °C until consumption of **1a**, which was monitored by TLC. Flash chromatography on silica gel (EtOAc/petroleum ether = 1/5) give **3a** as a colourless oil (45.6 mg, 68%).

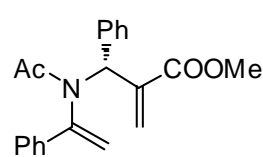

**3a**, 68% yield;  $[\alpha]_{\text{D}}^{20} = -37.0$  ( $c = 1.75$  in  $\text{CHCl}_3$ ); 85% ee, determined by HPLC analysis [Daicel Chiralpak AD, *n*-hexane/*i*-PrOH = 80/20, 1.0 mL/min,  $\lambda = 254$  nm,  $t$  (major) = 11.154 min,  $t$  (minor) = 7.511 min];  $^1\text{H}$  NMR (400 MHz,  $\text{CDCl}_3$ ):  $\delta =$

7.26–7.11 (m, 10H), 6.40 (s, 1H), 6.39 (s, 1H), 5.72 (s, 1H), 5.66 (s, 1H), 5.30 (s, 1H), 3.62 (s, 3H), 2.08 (s, 3H) ppm;  $^{13}\text{C}$  NMR (100 MHz,  $\text{CDCl}_3$ ):  $\delta = 171.0, 166.6, 146.9, 139.6, 137.4, 136.7, 129.8, 128.6,$

128.3, 127.7, 127.5, 126.6, 125.9, 115.8, 61.9, 51.9, 23.4 ppm; ESI-HRMS: calcd. for  $C_{21}H_{21}NO_3+Na$  358.1419, found 358.1424.

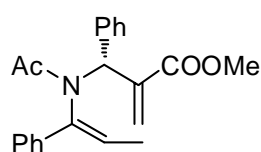

**3b**, 71% yield;  $[\alpha]_D^{20} = +13.6$  ( $c = 0.22$  in  $CHCl_3$ ); 82% ee, determined by HPLC analysis [Daicel Chiralpak AD,  $n$ -hexane/ $i$ -PrOH = 80/20, 1.0 mL/min,  $\lambda = 254$  nm,  $t$  (major) = 8.280 min,  $t$  (minor) = 6.804 min];  $^1H$  NMR (400 MHz,  $CDCl_3$ ): major rotational isomer:  $\delta = 7.30$ -7.06 (m, 5.67H), 6.39 (s, 0.57H), 6.28 (s, 0.57H), 6.23 (s, 0.57H), 5.90 (q,  $J = 6.8$  Hz, 0.57H), 3.60 (s, 1.71H), 2.16 (s, 1.71H), 1.51 (d,  $J = 6.8$  Hz, 1.71H) ppm; minor rotational isomer:  $\delta = 7.30$ -7.06 (m, 4.33H), 5.83 (s, 0.43H), 5.82-5.77 (m, 0.43H), 5.76 (s, 0.43H), 5.67 (s, 0.43H), 3.66 (s, 1.29H), 2.14 (s, 1.29H), 1.74 (d,  $J = 7.2$  Hz, 1.29H) ppm;  $^{13}C$  NMR (100 MHz,  $CDCl_3$ ): major rotational isomer:  $\delta = 171.7, 166.6, 155.8, 141.3, 139.2, 136.1, 129.9, 128.3, 128.0, 127.8, 127.5, 126.6, 126.3, 125.0, 62.3, 51.9, 22.5, 14.6$  ppm; minor rotational isomer:  $\delta = 170.4, 162.5, 152.8, 140.1, 137.2, 130.2, 128.5, 128.2, 127.9, 127.6, 127.4, 126.4, 125.8, 111.3, 61.2, 51.8, 22.4, 14.6$  ppm; ESI-HRMS: calcd. for  $C_{22}H_{23}NO_3+Na$  372.1576, found 372.1571.

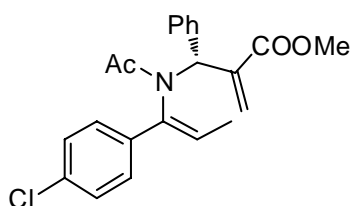

**3c**, 94% yield;  $[\alpha]_D^{20} = -52.7$  ( $c = 1.30$  in  $CHCl_3$ ); 87% ee, determined by HPLC analysis [Daicel Chiralpak AD,  $n$ -hexane/ $i$ -PrOH = 70/30, 1.0 mL/min,  $\lambda = 254$  nm,  $t$  (major) = 5.930 min,  $t$  (minor) = 5.297 min];  $^1H$  NMR (400 MHz,  $CDCl_3$ ): major rotational isomer:  $\delta = 7.26$ -7.04 (m, 4.68H), 6.36 (s, 0.52H), 6.26 (s, 0.52H), 6.25 (s, 0.52H), 5.88 (q,  $J = 7.2$  Hz, 0.52H), 3.60 (s, 1.56H), 2.13 (s, 1.56H), 1.52 (d,  $J = 6.8$  Hz, 1.56H) ppm; minor rotational isomer:  $\delta = 7.26$ -7.04 (m, 4.32H), 5.81-5.77 (m, 0.96H), 5.69 (s, 0.48H), 5.64 (s, 0.48H), 3.66 (s, 1.44H), 2.11 (s, 1.44H), 1.71 (d,  $J = 6.8$  Hz, 1.44H) ppm;  $^{13}C$  NMR (100 MHz,  $CDCl_3$ ): major rotational isomer:  $\delta = 171.6, 166.4, 140.3, 139.7, 137.8, 137.0, 133.9, 129.9, 128.5, 128.0, 127.7, 127.6, 127.0, 124.9, 62.3, 51.9, 22.5, 14.6$  ppm; minor rotational isomer:  $\delta = 171.1, 166.4, 140.1, 139.2, 137.1, 135.9, 133.9, 130.1, 129.1, 128.4, 127.9, 127.7, 127.1, 126.3, 61.2, 51.9, 22.4, 14.5$  ppm; ESI-HRMS: calcd. for  $C_{22}H_{22}ClNO_3+Na$  406.1186, found 406.1188.

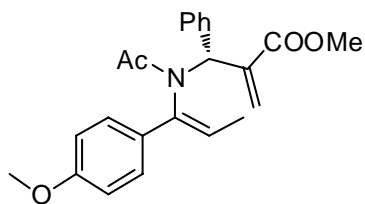

**3d**, 63% yield;  $[\alpha]_D^{20} = -56.4$  ( $c = 2.40$  in  $CHCl_3$ ); 86% ee, determined by HPLC analysis [Daicel Chiralpak AS,  $n$ -hexane/ $i$ -PrOH = 80/20, 1.0 mL/min,  $\lambda = 254$  nm,  $t$  (major) = 8.638 min,  $t$  (minor) = 5.927 min];  $^1H$  NMR (400 MHz,  $CDCl_3$ ): major rotational isomer:  $\delta = 7.27$ -7.04 (m,

3.92H), 6.83-6.76 (m, 1.12H), 6.34 (s, 0.56H), 6.27 (s, 0.56H), 6.25 (s, 0.56H), 5.78 (q,  $J = 6.8$  Hz, 0.56H), 3.82 (s, 1.68H), 3.60 (s, 1.68H), 2.15 (s, 1.68H), 1.50 (d,  $J = 7.2$  Hz, 1.68H) ppm; minor rotational isomer:  $\delta = 7.27$ -7.04 (m, 3.08H), 6.83-6.76 (m, 0.88H), 5.84 (s, 0.44H), 5.71 (s, 0.44H), 5.67 (q,  $J = 7.2$  Hz, 0.44H), 5.64 (s, 0.44H), 3.80 (s, 1.32H), 3.66 (s, 1.32H), 2.12 (s, 1.32H), 1.68 (d,  $J = 7.2$  Hz, 1.32H) ppm;  $^{13}\text{C}$  NMR (100 MHz,  $\text{CDCl}_3$ ): major rotational isomer:  $\delta = 171.7, 166.5, 159.5, 140.8, 140.1, 137.4, 131.8, 130.2, 127.9, 127.6, 127.4, 126.8, 125.1, 113.7, 62.3, 55.3, 51.9, 22.5, 14.5$  ppm; minor rotational isomer:  $\delta = 171.2, 166.5, 159.5, 140.2, 139.4, 136.1, 131.1, 129.8, 127.8, 127.5, 127.2, 126.1, 124.7, 113.5, 61.3, 55.3, 51.8, 22.4, 14.3$  ppm; ESI-HRMS: calcd. for  $\text{C}_{23}\text{H}_{26}\text{NO}_4 + \text{H}$  380.1862, found 380.1867.

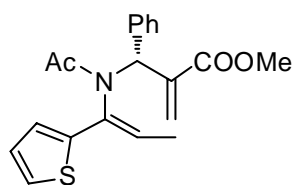

**3e**, 59% yield;  $[\alpha]_{\text{D}}^{20} = -63.7$  ( $c = 2.10$  in  $\text{CHCl}_3$ ); 89% ee, determined by HPLC analysis [Daicel Chiralpak AD,  $n$ -hexane/ $i$ -PrOH = 80/20, 1.0 mL/min,  $\lambda = 254$  nm,  $t$  (major) = 8.607 min,  $t$  (minor) = 6.613 min];  $^1\text{H}$  NMR (400 MHz,  $\text{CDCl}_3$ ): major rotational isomer:  $\delta = 7.27$ -7.08 (m, 3.24H), 6.95-6.90 (m, 0.54H), 6.84-6.83 (m, 0.54H), 6.35 (s, 0.54H), 6.34 (s, 0.54H), 6.30 (s, 0.54H), 5.96-5.91 (m, 0.54H), 3.62 (s, 1.62H), 2.16 (s, 1.62H), 1.54 (d,  $J = 6.8$  Hz, 1.62H) ppm; minor rotational isomer:  $\delta = 7.27$ -7.08 (m, 2.76H), 6.95-6.90 (m, 0.92H), 5.98 (s, 0.46H), 5.88-5.82 (m, 0.92H), 5.77 (s, 0.46H), 3.65 (s, 1.38H), 2.10 (s, 1.38H), 1.69 (d,  $J = 7.2$  Hz, 1.38H) ppm;  $^{13}\text{C}$  NMR (100 MHz,  $\text{CDCl}_3$ ): major rotational isomer:  $\delta = 174.2, 166.5, 143.6, 139.7, 136.8, 135.9, 129.9, 128.8, 127.8, 127.6, 127.2, 125.8, 124.8, 124.5, 62.5, 51.8, 22.6, 14.2$  ppm; minor rotational isomer:  $\delta = 171.2, 166.5, 143.1, 139.2, 136.0, 135.2, 129.8, 128.3, 127.7, 127.5, 127.1, 125.0, 124.7, 124.2, 61.8, 51.8, 22.4, 14.0$  ppm; ESI-HRMS: calcd. for  $\text{C}_{20}\text{H}_{21}\text{NO}_3\text{S} + \text{Na}$  378.1140, found 378.1149.

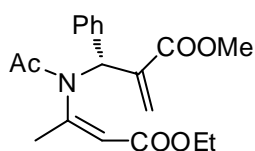

**3f**, 52% yield;  $[\alpha]_{\text{D}}^{20} = -11.22$  ( $c = 1.80$  in  $\text{CH}_2\text{Cl}_2$ ); 87% ee, determined by HPLC analysis [Daicel Chiralpak AD,  $n$ -hexane/ $i$ -PrOH = 80/20, 1.0 mL/min,  $\lambda = 254$  nm,  $t$  (major) = 7.478 min,  $t$  (minor) = 6.691 min];  $^1\text{H}$  NMR (400 MHz,  $\text{CDCl}_3$ ):  $\delta = 7.34$ -7.24 (m, 5H), 6.46 (s, 1H), 6.23 (s, 1H), 5.73 (s, 1H), 5.59 (s, 1H), 4.13 (q,  $J = 7.2$  Hz, 2H), 3.71 (s, 3H), 2.14 (s, 3H), 2.12 (s, 3H), 1.26 (t,  $J = 7.2$  Hz, 3H) ppm;  $^{13}\text{C}$  NMR (100 MHz,  $\text{CDCl}_3$ ):  $\delta = 169.0, 166.5, 165.4, 154.8, 139.2, 137.0, 128.8, 128.4, 127.9, 127.7, 122.1, 61.9, 60.3, 52.1, 23.2, 21.1, 14.1$  ppm; ESI-HRMS: calcd. for  $\text{C}_{19}\text{H}_{23}\text{NO}_5 + \text{Na}$  368.1474, found 368.1469.

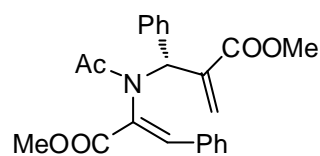

**3g**, 92% yield;  $[\alpha]_D^{20} = -222.0$  ( $c = 3.60$  in  $\text{CHCl}_3$ ); 84% ee, determined by HPLC analysis [Daicel Chiralpak AD,  $n$ -hexane/ $i$ -PrOH = 80/20, 1.0 mL/min,  $\lambda = 254$  nm,  $t$  (major) = 14.599 min,  $t$  (minor) = 8.522 min];  $^1\text{H}$  NMR (400 MHz,  $\text{CDCl}_3$ ): major rotational isomer:  $\delta = 7.57$ -6.91 (m, 9.02H), 6.68 (s, 0.82H), 6.51 (s, 0.82H), 6.22 (s, 0.82H), 3.78 (s, 2.46H), 3.60 (s, 2.46H), 1.94 (s, 2.46H) ppm; minor rotational isomer:  $\delta = 7.57$ -6.91 (m, 1.98H), 6.24 (s, 0.18H), 6.18 (s, 0.18H), 5.52 (s, 0.18H), 3.74 (s, 0.54H), 3.44 (s, 0.54H), 2.05 (s, 0.54H) ppm;  $^{13}\text{C}$  NMR (100 MHz,  $\text{CDCl}_3$ ): major rotational isomer:  $\delta = 170.4$ , 166.5, 166.2, 140.5, 138.1, 134.8, 131.0, 130.3, 129.8, 128.8, 128.7, 128.3, 127.7, 125.0, 62.0, 52.4, 51.6, 22.7 ppm; minor rotational isomer:  $\delta = 170.4$ , 166.5, 166.2, 139.8, 137.6, 132.3, 130.8, 130.1, 129.2, 128.8, 128.5, 127.8, 127.7, 127.3, 62.8, 52.4, 52.4, 22.7 ppm; ESI-HRMS: calcd. for  $\text{C}_{23}\text{H}_{23}\text{NO}_5 + \text{Na}$  416.1474, found 416.1474.

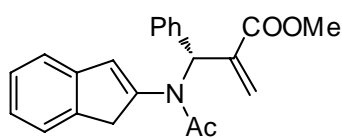

**3h**, 68% yield;  $[\alpha]_D^{20} = -11.88$  ( $c = 1.65$  in  $\text{CH}_2\text{Cl}_2$ ); 82% ee, determined by HPLC analysis [Daicel Chiralcel OD,  $n$ -hexane/ $i$ -PrOH = 80/20, 1.0 mL/min,  $\lambda = 254$  nm,  $t$  (major) = 15.194 min,  $t$  (minor) = 13.537 min];  $^1\text{H}$  NMR (400 MHz,  $\text{CDCl}_3$ ):  $\delta = 7.37$ -7.15 (m, 9H), 6.63 (s, 1H), 6.54 (s, 1H), 6.43 (s, 1H), 5.66 (s, 1H), 3.69 (s, 3H), 3.27 (d,  $J = 22.8$  Hz, 1H), 2.97 (d,  $J = 22.4$  Hz, 1H), 2.72 (s, 3H) ppm;  $^{13}\text{C}$  NMR (100 MHz,  $\text{CDCl}_3$ ):  $\delta = 170.2$ , 166.6, 145.8, 141.9, 141.0, 139.6, 137.5, 128.6, 128.5, 127.8, 127.5, 127.3, 126.7, 125.6, 123.6, 121.6, 61.1, 52.1, 41.2, 23.2 ppm; ESI-HRMS: calcd. for  $\text{C}_{22}\text{H}_{21}\text{NO}_3 + \text{Na}$  370.1419, found 370.1413.

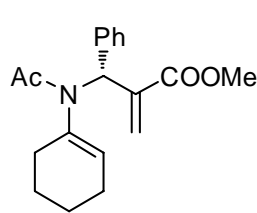

**3i**, 26% yield;  $[\alpha]_D^{20} = -47.31$  ( $c = 1.60$  in  $\text{CHCl}_3$ ); 69% ee, determined by HPLC analysis [Daicel Chiralpak AD,  $n$ -hexane/ $i$ -PrOH = 80/20, 1.0 mL/min,  $\lambda = 220$  nm,  $t$  (major) = 9.197 min,  $t$  (minor) = 6.617 min];  $^1\text{H}$  NMR (400 MHz,  $\text{CDCl}_3$ ):  $\delta = 7.30$ -7.21 (m, 5H), 6.40 (s, 1H), 6.31 (s, 1H), 5.60 (brs, 2H), 3.65 (s, 3H), 2.09 (s, 3H), 1.96-1.26 (m, 8H) ppm;  $^{13}\text{C}$  NMR (100 MHz,  $\text{CDCl}_3$ ):  $\delta = 169.9$ , 166.8, 137.7, 130.7, 129.3, 128.0, 127.5, 126.2, 61.0, 51.9, 30.7, 24.9, 22.6, 22.5, 21.1 ppm; ESI-HRMS: calcd. for  $\text{C}_{19}\text{H}_{23}\text{NO}_3 + \text{Na}$  336.1576, found 336.1571.

**3j**, 94% yield;  $[\alpha]_D^{20} = -67.69$  ( $c = 2.28$  in  $\text{CHCl}_3$ ); 90% ee, determined by HPLC analysis [Daicel Chiralpak AD,  $n$ -hexane/ $i$ -PrOH = 80/20, 1.0 mL/min,  $\lambda = 254$  nm,  $t$  (major) = 8.017 min,  $t$  (minor) = 7.156 min];  $^1\text{H}$  NMR (400 MHz,  $\text{CDCl}_3$ ): major rotational isomer:  $\delta = 7.30$ -7.01 (m, 4.16H), 6.30 (s, 0.52H), 6.29 (s, 0.52H), 6.27 (s, 0.52H), 5.93 (q,  $J = 7.2$  Hz, 0.52H), 3.62 (s, 1.56H), 2.14 (s, 1.56H), 1.58

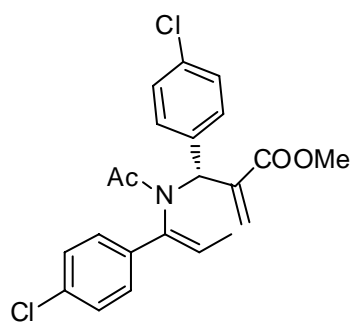

(d,  $J = 7.2$  Hz, 1.56H) ppm; minor rotational isomer:  $\delta = 7.30$ -7.01 (m, 3.84H), 5.85-5.82 (m, 0.96H), 5.69 (s, 0.48H), 5.66 (s, 0.48H), 3.68 (s, 1.44H), 2.12 (s, 1.44H), 1.74 (d,  $J = 7.2$  Hz, 1.44H) ppm;  $^{13}\text{C}$  NMR (100 MHz,  $\text{CDCl}_3$ ): major rotational isomer:  $\delta = 171.6, 166.3, 140.2, 139.6, 137.5, 135.7, 134.1, 133.8, 131.3, 128.9, 128.5, 127.8, 127.2, 126.6, 61.7, 52.0, 22.4, 14.7$  ppm; minor rotational isomer:  $\delta = 171.1, 166.1, 139.7, 138.8, 136.9, 134.7, 133.9, 133.5, 131.1, 128.6, 127.9, 127.8, 127.1, 125.3, 60.8, 51.9, 22.3, 14.5$  ppm; ESI-HRMS: calcd. for  $\text{C}_{22}\text{H}_{21}\text{Cl}_2\text{NO}_3 + \text{Na}$  440.0796, found 440.0789.

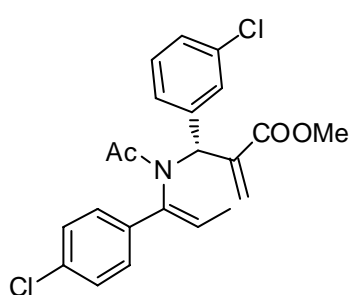

**3k**, 78% yield;  $[\alpha]_{\text{D}}^{20} = -51.29$  ( $c = 1.70$  in  $\text{CHCl}_3$ ); 82% ee, determined by HPLC analysis [Daicel Chiralcel OD,  $n$ -hexane/ $i$ -PrOH = 80/20, 1.0 mL/min,  $\lambda = 254$  nm,  $t$  (major) = 6.253 min,  $t$  (minor) = 14.444 min];  $^1\text{H}$  NMR (400 MHz,  $\text{CDCl}_3$ ): major rotational isomer:  $\delta = 7.28$ -6.95 (m, 4.0H), 6.30 (s, 0.5H), 6.29 (s, 0.5H), 6.27 (s, 0.5H), 5.93-5.90 (m, 0.5H), 3.67 (s, 1.5H), 2.14 (s, 1.5H), 1.73 (d,  $J = 6.8$  Hz, 1.5H) ppm; minor rotational isomer:  $\delta = 7.28$ -6.95 (m, 4.0H), 5.83-5.80 (m, 1.0H), 5.73 (s, 0.5H), 5.63 (s, 0.5H), 3.61 (s, 1.5H), 2.11 (s, 1.5H), 1.56 (d,  $J = 6.8$  Hz, 1.5H) ppm;  $^{13}\text{C}$  NMR (100 MHz,  $\text{CDCl}_3$ ): major rotational isomer:  $\delta = 171.6, 166.3, 140.1, 139.3, 138.2, 136.9, 133.5, 130.0, 129.1, 128.9, 128.6, 128.2, 127.8, 127.4, 126.9, 125.9, 61.6, 52.1, 22.4, 14.7$  ppm; minor rotational isomer:  $\delta = 171.1, 166.1, 139.7, 138.5, 137.6, 134.1, 134.0, 133.5, 129.8, 129.1, 128.6, 128.2, 127.9, 127.8, 127.2, 125.9, 60.8, 52.0, 22.3, 14.6$  ppm; ESI-HRMS: calcd. for  $\text{C}_{22}\text{H}_{21}\text{Cl}_2\text{NO}_3 + \text{Na}$  440.0796, found 440.0791.

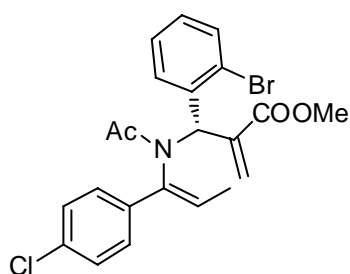

**3l**, 99% yield;  $[\alpha]_{\text{D}}^{20} = +146.1$  ( $c = 3.30$  in  $\text{CHCl}_3$ ); 87% ee, determined by HPLC analysis [Daicel Chiralpak AD,  $n$ -hexane/ $i$ -PrOH = 80/20, 1.0 mL/min,  $\lambda = 254$  nm,  $t$  (major) = 7.483 min,  $t$  (minor) = 5.630 min];  $^1\text{H}$  NMR (400 MHz,  $\text{CDCl}_3$ ): major rotational isomer:  $\delta = 7.54$ -7.00 (m, 5.28H), 6.18 (s, 0.66H), 6.13 (s, 0.66H), 5.81 (q,  $J = 6.8$  Hz, 0.66H), 5.24 (s, 0.66H), 3.67 (s, 1.98H), 2.11 (s, 1.98H), 1.60 (d,  $J = 6.8$  Hz, 1.98H) ppm; minor rotational isomer:  $\delta = 7.54$ -7.00 (m, 2.72H), 6.69 (s, 0.34H), 6.25 (s, 0.34H), 5.84-5.79 (m, 0.34H), 5.61 (s, 0.34H), 3.54 (s, 1.02H), 2.14 (s, 1.02H), 1.74 (d,  $J = 6.8$  Hz, 1.02H) ppm;  $^{13}\text{C}$  NMR (100 MHz,  $\text{CDCl}_3$ ): major rotational

isomer:  $\delta$  = 171.2, 166.1, 140.0, 138.8, 137.5, 136.8, 133.7, 132.5, 130.7, 129.7, 128.9, 128.2, 127.7, 126.6, 126.3, 124.9, 60.9, 51.8, 22.1, 14.4 ppm; minor rotational isomer:  $\delta$  = 171.3, 165.9, 139.6, 138.6, 137.8, 136.6, 133.5, 132.7, 131.3, 129.1, 128.9, 128.2, 128.1, 126.9, 126.5, 125.5, 61.2, 51.7, 22.3, 15.3 ppm; ESI-HRMS: calcd. for  $C_{22}H_{21}BrClNO_3+Na$  484.0291, found 484.0296.

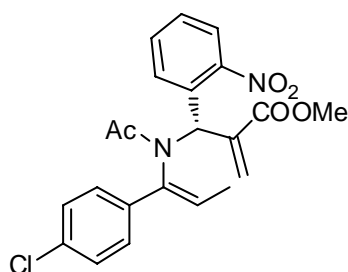

**3m**, 70% yield;  $[\alpha]_D^{20}$  = +128.2 ( $c$  = 1.48 in  $CHCl_3$ ); 92% ee, determined by HPLC analysis [Daicel Chiralpak AD,  $n$ -hexane/ $i$ -PrOH = 80/20, 1.0 mL/min,  $\lambda$  = 254 nm,  $t$  (major) = 8.190 min,  $t$  (minor) = 7.248 min];  $^1H$  NMR (400 MHz,  $CDCl_3$ ): major rotational isomer:  $\delta$  = 7.80-7.06 (m, 5.52H), 6.45 (s, 0.69H), 6.21 (s, 0.69H), 5.84 (q,  $J$  = 7.2 Hz, 0.69H), 5.16 (s, 0.69H), 3.72 (s, 2.07H), 2.13 (s, 2.07H), 1.55 (d,  $J$  = 6.8 Hz, 2.07H) ppm; minor rotational isomer:  $\delta$  = 7.80-7.06 (m, 2.48H), 6.77 (s, 0.31H), 6.31 (s, 0.31H), 5.90 (q,  $J$  = 7.2 Hz, 0.31H), 5.64 (s, 0.31H), 3.59 (s, 0.93H), 2.15 (s, 0.93H), 1.70 (d,  $J$  = 7.2 Hz, 0.93H) ppm;  $^{13}C$  NMR (100 MHz,  $CDCl_3$ ): major rotational isomer:  $\delta$  = 171.4, 165.8, 148.8, 137.8, 137.2, 134.1, 133.7, 132.3, 131.0, 129.1, 128.5, 128.3, 128.2, 127.8, 127.5, 124.4, 56.6, 52.0, 22.0, 14.3 ppm; minor rotational isomer:  $\delta$  = 171.5, 165.8, 148.8, 139.8, 137.4, 136.8, 133.8, 132.4, 131.6, 130.7, 128.9, 128.4, 128.3, 128.0, 127.8, 124.5, 56.3, 51.9, 22.2, 14.6 ppm; ESI-HRMS: calcd. for  $C_{22}H_{21}ClN_2O_5+Na$  451.1037, found 451.1033.

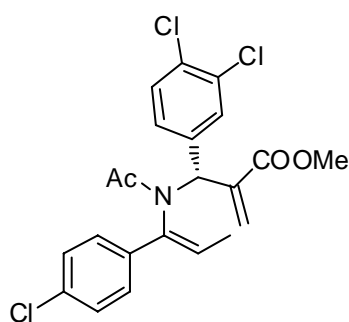

**3n**, 99% yield;  $[\alpha]_D^{20}$  = -56.57 ( $c$  = 1.75 in  $CHCl_3$ ); 91% ee, determined by HPLC analysis [Daicel Chiralcel OD,  $n$ -hexane/ $i$ -PrOH = 80/20, 1.0 mL/min,  $\lambda$  = 254 nm,  $t$  (major) = 6.452 min,  $t$  (minor) = 13.795 min];  $^1H$  NMR (400 MHz,  $CDCl_3$ ): major rotational isomer:  $\delta$  = 7.30-6.92 (m, 3.5H), 6.32 (s, 0.5H), 6.17 (s, 0.5H), 5.94 (q,  $J$  = 7.2 Hz, 0.5H), 5.73 (s, 0.5H), 3.67 (s, 1.5H), 2.13 (s, 1.5H), 1.74 (d,  $J$  = 7.2 Hz, 1.5H) ppm; minor rotational isomer:  $\delta$  = 7.30-6.92 (m, 3.5H), 6.32 (s, 0.5H), 5.86 (q,  $J$  = 7.2 Hz, 0.5H), 5.84 (s, 0.5H), 5.64 (s, 0.5H), 3.61 (s, 1.5H), 2.12 (s, 1.5H), 1.60 (d,  $J$  = 6.8 Hz, 1.5H) ppm;  $^{13}C$  NMR (100 MHz,  $CDCl_3$ ): major rotational isomer:  $\delta$  = 171.6, 166.1, 140.1, 139.1, 138.8, 137.6, 136.8, 136.4, 134.3, 131.7, 129.6, 129.2, 128.7, 127.8, 127.2, 126.4, 61.2, 52.1, 22.4, 14.7 ppm; minor rotational isomer:  $\delta$  = 171.1, 165.9, 140.0, 139.8, 138.5, 138.2, 137.3, 136.9, 136.7, 134.2, 131.5, 129.6, 128.9, 128.6, 127.5, 127.1, 60.5, 52.0, 22.2, 14.6 ppm; ESI-HRMS: calcd. for  $C_{22}H_{20}Cl_3NO_3+Na$  474.0406, found 474.0412.

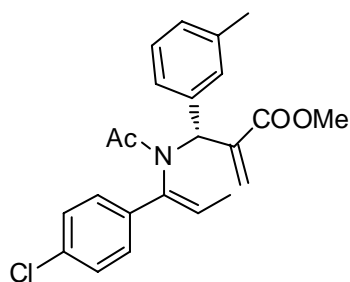

**3o**, 88% yield;  $[\alpha]_D^{20} = -44.71$  ( $c = 1.72$  in  $\text{CH}_2\text{Cl}_2$ ); 87% ee, determined by HPLC analysis [Daicel Chiralcel OD,  $n$ -hexane/ $i$ -PrOH = 80/20, 1.0 mL/min,  $\lambda = 254$  nm,  $t$  (major) = 5.916 min,  $t$  (minor) = 12.014 min];  $^1\text{H}$  NMR (400 MHz,  $\text{CDCl}_3$ ): major rotational isomer:  $\delta = 7.26$ -7.19 (m, 1.12H), 7.08-6.76 (m, 3.36H), 6.30 (s, 0.56H), 6.27 (s, 0.56H), 6.25 (s, 0.56H), 5.87 (q,  $J = 7.2$  Hz, 0.56H), 3.60 (s, 1.68H), 2.18 (s, 1.68H), 2.14 (s, 1.68H), 1.53 (d,  $J = 7.2$  Hz, 1.68H) ppm; minor rotational isomer:  $\delta = 7.26$ -7.19 (m, 0.88H), 7.08-6.76 (m, 2.64H), 5.79 (s, 0.44H), 5.75 (q,  $J = 6.8$  Hz, 0.44H), 5.70 (s, 0.44H), 5.65 (s, 0.44H), 3.67 (s, 1.32H), 2.15 (s, 1.32H), 2.11 (s, 1.32H), 1.73 (d,  $J = 7.2$  Hz, 1.32H) ppm;  $^{13}\text{C}$  NMR (100 MHz,  $\text{CDCl}_3$ ): major rotational isomer:  $\delta = 171.5, 166.6, 140.3, 139.7, 138.0, 137.1, 135.7, 133.6, 130.9, 128.8, 128.3, 127.6, 127.3, 126.9, 125.8, 62.1, 51.9, 22.5, 21.3, 14.7$  ppm; minor rotational isomer:  $\delta = 171.1, 166.4, 140.1, 139.2, 137.2, 136.7, 133.8, 131.0, 129.0, 128.4, 127.9, 127.5, 127.2, 126.7, 124.8, 61.4, 51.9, 22.4, 21.2, 14.5$  ppm; ESI-HRMS: calcd. for  $\text{C}_{23}\text{H}_{24}\text{ClNO}_3 + \text{Na}$  420.1342, found 420.1349.

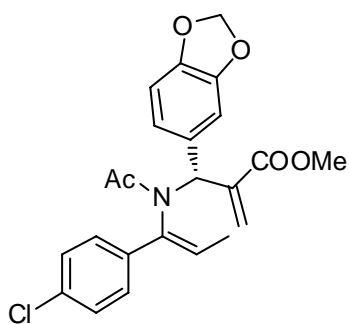

**3p**, 99% yield;  $[\alpha]_D^{20} = -66.25$  ( $c = 2.85$  in  $\text{CHCl}_3$ ); 90% ee, determined by HPLC analysis [Daicel Chiralcel OD,  $n$ -hexane/ $i$ -PrOH = 80/20, 1.0 mL/min,  $\lambda = 254$  nm,  $t$  (major) = 8.842 min,  $t$  (minor) = 19.214 min];  $^1\text{H}$  NMR (400 MHz,  $\text{CDCl}_3$ ): major rotational isomer:  $\delta = 7.28$ -7.22 (m, 1.0H), 7.11-7.08 (m, 1.0H), 6.62-6.46 (m, 1.5H), 6.26 (s, 0.5H), 6.25 (s, 0.5H), 6.24 (s, 0.5H), 5.93-5.82 (m, 1.5H), 3.68 (s, 1.5H), 2.14 (s, 1.5H), 1.74 (d,  $J = 7.2$  Hz, 1.5H) ppm; minor rotational isomer:  $\delta = 7.28$ -7.22 (m, 1.0H), 7.11-7.08 (m, 1.0H), 6.62-6.46 (m, 1.5H), 5.93-5.82 (m, 1.5H), 5.79 (s, 0.5H), 5.67 (s, 0.5H), 5.63 (s, 0.5H), 3.62 (s, 1.5H), 2.11 (s, 1.5H), 1.57 (d,  $J = 7.2$  Hz, 1.5H) ppm;  $^{13}\text{C}$  NMR (100 MHz,  $\text{CDCl}_3$ ): major rotational isomer:  $\delta = 171.5, 166.5, 147.0, 146.9, 140.2, 139.7, 137.8, 133.8, 130.6, 129.0, 128.4, 127.1, 125.7, 123.9, 110.5, 107.5, 101.1, 61.9, 51.9, 22.5, 14.7$  ppm; minor rotational isomer:  $\delta = 171.1, 166.3, 147.2, 147.0, 140.2, 139.3, 137.1, 133.7, 129.6, 128.4, 127.8, 127.0, 124.4, 123.8, 110.2, 107.3, 101.0, 61.0, 51.9, 22.3, 14.5$  ppm; ESI-HRMS: calcd. for  $\text{C}_{23}\text{H}_{22}\text{ClNO}_5 + \text{Na}$  450.1084, found 450.1089.

**3q**, 75% yield;  $[\alpha]_D^{20} = -60.16$  ( $c = 1.27$  in  $\text{CHCl}_3$ ); 71% ee, determined by HPLC analysis [Daicel Chiralcel OD,  $n$ -hexane/ $i$ -PrOH = 80/20, 1.0 mL/min,  $\lambda = 254$  nm,  $t$  (major) = 7.290 min,  $t$  (minor) = 9.252 min];  $^1\text{H}$  NMR (400 MHz,  $\text{CDCl}_3$ ): major rotational isome:  $\delta = 7.27$ -7.11 (m, 2.9H), 6.88-6.81 (m,



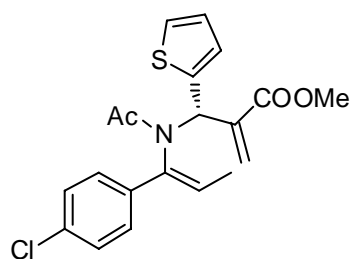

1.16H), 6.63 (s, 0.58H), 6.27 (s, 0.58H), 6.01 (s, 0.58H), 5.96 (q,  $J = 6.8$  Hz, 0.58H), 3.68 (s, 1.74H), 2.11 (s, 1.74H), 1.52 (d,  $J = 6.8$  Hz, 1.74H) ppm; minor rotational isomer:  $\delta = 7.27$ -7.11 (m, 2.1H), 6.74-6.68 (m, 0.84H), 6.38 (s, 0.42H), 6.37 (s, 0.42H), 6.03 (q,  $J = 7.2$  Hz, 0.42H), 5.92 (s, 0.42H), 3.70 (s, 1.26H), 2.09 (s, 1.26H), 1.72 (d,  $J = 6.8$  Hz, 1.26H) ppm;  $^{13}\text{C}$  NMR (100 MHz,  $\text{CDCl}_3$ ): major rotational isomer:  $\delta = 171.7, 170.8, 166.4, 150.6, 139.5, 138.8, 136.9, 133.9, 128.9, 128.6, 128.4, 127.6, 127.0, 125.9, 55.9, 52.2, 22.4, 14.5$  ppm; minor rotational isomer:  $\delta = 171.3, 170.5, 166.4, 150.1, 140.3, 139.2, 137.4, 133.9, 128.7, 128.5, 128.3, 127.2, 126.2, 125.9, 54.9, 52.1, 22.2, 14.5$  ppm; ESI-HRMS: calcd. for  $\text{C}_{20}\text{H}_{20}\text{ClNO}_3\text{S}+\text{K}$  428.0489, found 428.0464.

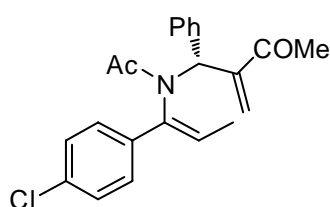

**3r**, 94% yield;  $[\alpha]_{\text{D}}^{20} = -31.79$  ( $c = 1.40$  in  $\text{CH}_2\text{Cl}_2$ ); 80% ee, determined by HPLC analysis [Daicel Chiralpak AD,  $n$ -hexane/ $i$ -PrOH = 80/20, 1.0 mL/min,  $\lambda = 254$  nm,  $t$  (major) = 8.718 min,  $t$  (minor) = 6.386 min];  $^1\text{H}$  NMR (400 MHz,  $\text{CDCl}_3$ ): major rotational isomer:  $\delta = 7.28$ -7.04 (m, 4.86H), 5.96 (s, 0.54H), 5.82-5.76 (m, 0.54H), 5.56 (s, 0.54H), 5.40 (s, 0.54H), 2.36 (s, 1.62H), 2.07 (s, 1.62H), 1.56-1.53 (m, 1.62H) ppm; minor rotational isomer:  $\delta = 7.28$ -7.04 (m, 4.14H), 6.31 (s, 0.46H), 6.10 (s, 0.46H), 5.99 (s, 0.46H), 5.82-5.76 (m, 0.46H), 2.15 (s, 1.38H), 2.11 (s, 1.38H), 1.56-1.53 (m, 1.38H) ppm;  $^{13}\text{C}$  NMR (100 MHz,  $\text{CDCl}_3$ ): major rotational isomer:  $\delta = 198.8, 171.4, 149.0, 140.3, 137.8, 136.5, 134.0, 130.0, 128.8, 128.4, 127.8, 127.7, 126.8, 123.0, 62.0, 26.5, 22.5, 14.7$  ppm; minor rotational isomer:  $\delta = 198.2, 171.1, 147.5, 139.9, 137.5, 136.4, 133.8, 129.9, 128.5, 127.9, 127.8, 127.7, 126.0, 123.0, 60.3, 26.1, 22.4, 14.3$  ppm; ESI-HRMS: calcd. for  $\text{C}_{22}\text{H}_{23}\text{ClNO}_2+\text{H}$  368.1417, found 368.1424.

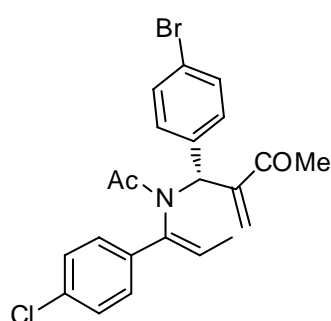

**3s**, 78% yield;  $[\alpha]_{\text{D}}^{20} = -28.52$  ( $c = 1.35$  in  $\text{CHCl}_3$ ); 86% ee, determined by HPLC analysis [Daicel Chiralpak AD,  $n$ -hexane/ $i$ -PrOH = 80/20, 1.0 mL/min,  $\lambda = 254$  nm,  $t$  (major) = 9.257 min,  $t$  (minor) = 7.174 min];  $^1\text{H}$  NMR (400 MHz,  $\text{CDCl}_3$ ): major rotational isomer:  $\delta = 7.29$ -7.26 (m, 2.12H), 7.21-7.18 (m, 0.53H), 7.08-7.06 (m, 0.53H), 7.00-6.94 (m, 1.06H), 6.19 (s, 0.53H), 5.99 (s, 0.53H), 5.85-5.81 (m, 0.53H), 5.59 (s, 0.53H), 2.34 (s, 1.59H), 2.07 (s, 1.59H), 1.60-1.57 (m, 1.59H) ppm; minor rotational isomer:  $\delta = 7.29$ -7.26 (m, 1.88H), 7.21-7.18 (m, 0.47H), 7.08-7.06 (m, 0.47H), 7.00-6.94 (m, 0.94H), 6.13 (s, 0.47H), 6.03 (s, 0.47H), 5.85-5.81 (m, 0.47H), 5.41 (s, 0.47H), 2.16 (s, 1.41H), 2.11 (s, 1.41H), 1.60-1.57 (m, 1.41H) ppm;  $^{13}\text{C}$  NMR (100 MHz,

CDCl<sub>3</sub>): major rotational isomer:  $\delta$  = 198.5, 171.6, 148.4, 140.2, 137.4, 136.3, 134.2, 131.5, 131.0, 128.7, 127.9, 126.9, 123.5, 112.1, 61.3, 26.4, 22.5, 14.7 ppm; minor rotational isomer:  $\delta$  = 198.5, 171.2, 147.1, 139.9, 136.7, 135.8, 134.1, 131.5, 130.8, 128.6, 127.5, 126.5, 121.7, 112.1, 59.9, 26.0, 22.4, 14.4 ppm; ESI-HRMS: calcd. for C<sub>22</sub>H<sub>21</sub>BrClNO<sub>2</sub>+Na 468.0342, found 468.0349.

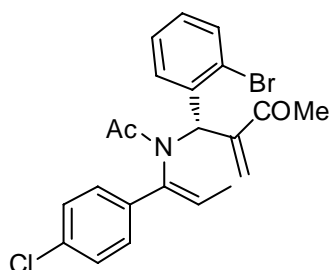

**3t**, 90% yield;  $[\alpha]_D^{20}$  = +129.7 ( $c$  = 2.05 in CHCl<sub>3</sub>); 87% ee, determined by HPLC analysis [Daicel Chiralpak AD, *n*-hexane/*i*-PrOH = 80/20, 1.0 mL/min,  $\lambda$  = 254 nm,  $t$  (major) = 7.990 min,  $t$  (minor) = 6.059 min]; <sup>1</sup>H NMR (400 MHz, CDCl<sub>3</sub>): major rotational isomer:  $\delta$  = 7.70-7.68 (m, 0.64H), 7.45-6.99 (m, 4.48H), 5.87-5.85 (m, 1.28H), 5.76 (q,  $J$  = 6.8 Hz, 0.64H), 5.12 (s, 0.64H), 2.38 (s, 1.92H), 2.08 (s, 1.92H), 1.43 (d,  $J$  = 7.2 Hz, 1.92H ) ppm; minor rotational isomer:  $\delta$  = 7.45-6.99 (m, 2.88H), 6.46 (s, 0.36H), 6.06 (s, 0.36H), 5.87-5.81 (m, 0.36H), 5.67 (s, 0.36H), 2.22 (s, 1.08H), 2.14 (s, 1.08H), 1.79 (d,  $J$  = 7.2 Hz, 1.08H ) ppm; <sup>13</sup>C NMR (100 MHz, CDCl<sub>3</sub>): major rotational isomer:  $\delta$  = 198.5, 171.6, 148.1, 140.2, 138.3, 136.1, 134.1, 132.6, 131.3, 129.0, 128.3, 128.0, 127.3, 126.1, 124.8, 124.1, 61.0, 26.6, 22.3, 14.3 ppm; minor rotational isomer:  $\delta$  = 198.5, 171.6, 147.2, 140.2, 137.6, 136.1, 134.1, 132.8, 131.3, 129.2, 128.5, 128.2, 127.8, 126.6, 124.8, 124.1, 61.1, 26.3, 22.6, 15.4 ppm; ESI-HRMS: calcd. for C<sub>22</sub>H<sub>22</sub>BrClNO<sub>2</sub>+H 446.0522, found 446.0524.

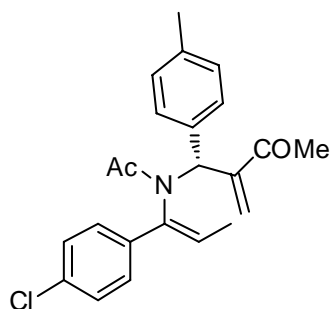

**3u**, 72% yield;  $[\alpha]_D^{20}$  = -15.9 ( $c$  = 1.35 in CHCl<sub>3</sub>); 86% ee, determined by HPLC analysis [Daicel Chiralcel AD, *n*-hexane/*i*-PrOH = 80/20, 1.0 mL/min,  $\lambda$  = 254 nm,  $t$  (major) = 6.888 min,  $t$  (minor) = 5.823 min]; <sup>1</sup>H NMR (400 MHz, CDCl<sub>3</sub>): major rotational isomer:  $\delta$  = 7.28-7.20 (m, 2.08H), 7.07-6.94 (m, 2.08H), 6.07 (s, 0.52H), 5.94 (s, 0.52H), 5.80-5.78 (m, 0.52H), 5.56 (s, 0.52H), 2.35 (s, 1.56H), 2.27 (s, 1.56H), 2.06 (s, 1.56H), 1.56-1.53 (m, 1.56H) ppm; minor rotational isomer:  $\delta$  = 7.28-7.20 (m, 1.92H), 7.07-6.94 (m, 1.92H), 6.26 (s, 0.48H), 5.99 (s, 0.48H), 5.80-5.78 (m, 0.48H), 5.37 (s, 0.48H), 2.28 (s, 1.44H), 2.14 (s, 1.44H), 2.11 (s, 1.44H), 1.56-1.53 (m, 1.44H) ppm; <sup>13</sup>C NMR (100 MHz, CDCl<sub>3</sub>): major rotational isomer:  $\delta$  = 198.8, 171.4, 149.2, 140.4, 137.8, 137.4, 134.5, 133.4, 129.8, 128.5, 128.4, 128.0, 126.7, 122.9, 61.8, 26.5, 22.6, 21.1, 14.7 ppm; minor rotational isomer:  $\delta$  = 198.2, 171.1, 147.7, 140.0, 137.5, 136.5, 134.0, 130.0, 128.7, 128.4, 128.4, 127.7, 125.7, 122.9, 60.2, 26.1, 22.4, 21.1, 14.3 ppm; ESI-HRMS: calcd. for C<sub>23</sub>H<sub>25</sub>ClNO<sub>2</sub>+H 382.1574, found 382.1579.

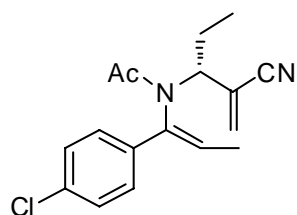

**3v**, 45% yield;  $[\alpha]_D^{20} = -37.9$  ( $c = 0.80$  in  $\text{CHCl}_3$ ); 39% ee, determined by HPLC analysis [Daicel Chiralpak AD,  $n$ -hexane/ $i$ -PrOH = 90/10, 1.0 mL/min,  $\lambda = 254$  nm,  $t$  (major) = 6.606 min,  $t$  (minor) = 7.474 min];  $^1\text{H}$  NMR (400 MHz,  $\text{CDCl}_3$ ): major rotational isomer:  $\delta = 7.34$ -7.23 (m, 2.6H), 6.24 (q,  $J = 7.2$  Hz, 0.65H), 6.13 (s, 0.65H), 6.09 (s, 0.65H), 5.21 (dd,  $J = 10.8$  Hz, 5.6 Hz, 0.65H), 2.06 (s, 1.95H), 1.78 (d,  $J = 7.2$  Hz, 1.95H), 1.42-1.21 (m, 1.3H), 0.73 (t,  $J = 7.2$  Hz, 1.95H) ppm; minor rotational isomer:  $\delta = 7.34$ -7.23 (m, 1.4H), 6.29 (q,  $J = 7.2$  Hz, 0.35H), 5.95 (s, 0.35H), 5.83 (s, 0.35H), 4.93 (dd,  $J = 10.8$  Hz, 5.6 Hz, 0.35H), 2.05 (s, 1.05H), 1.84 (d,  $J = 6.8$  Hz, 1.05H), 1.42-1.21 (m, 0.7H), 0.85 (t,  $J = 7.2$  Hz, 1.05H) ppm;  $^{13}\text{C}$  NMR (100 MHz,  $\text{CDCl}_3$ ): major rotational isomer:  $\delta = 170.8, 137.5, 137.1, 136.5, 134.3, 129.8, 128.8, 127.2, 122.1, 117.1, 58.6, 24.7, 21.5, 15.1, 10.9$  ppm; minor rotational isomer:  $\delta = 175.1, 137.4, 136.7, 136.3, 134.2, 128.9, 128.8, 127.0, 122.0, 117.1, 59.1, 23.9, 21.7, 14.8, 10.7$  ppm; ESI-HRMS: calcd. for  $\text{C}_{17}\text{H}_{19}\text{ClN}_2\text{O}+\text{K}$  341.0823, found 341.0826.

### 3. General procedure for the one-pot *N*-alkylation–Aza-Cope rearrangement.

#### Optimisation of the one-pot *N*-alkylation–aza-Cope rearrangement<sup>a</sup>

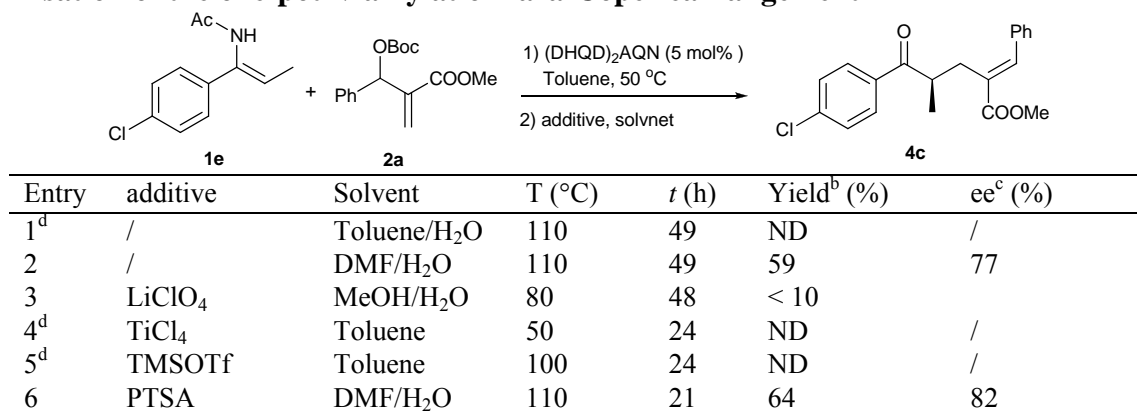

<sup>a</sup> Unless otherwise noted, reactions were performed with 0.2 mmol of **1e**, 0.4 mmol of **2a**, 0.01 mmol of catalyst in 1 mL toluene at 50 °C. After the consumption of **1e**, the solvent was removed under reduced pressure, and new solvent was added to the residue, followed by the additive. <sup>b</sup> Isolated yield of two steps. <sup>c</sup> Determined by chiral HPLC analysis. <sup>d</sup> Not determined.

To a solution of **1e** (42.0 mg, 0.2 mmol) and (DHQD)<sub>2</sub>AQN (8.6 mg, 5 mol%) in dry toluene (1.0 mL) was added **2a** (116.8 mg, 0.4 mmol). The reaction mixture was stirred at 50 °C until consumption of **1e**, which was monitored by TLC analysis. Then the solvent was removed under reduced pressure, DMF (400  $\mu\text{L}$ ) and H<sub>2</sub>O (100  $\mu\text{L}$ ) were added to the residue, followed by PTSA (10.3 mg, 0.06 mmol). The mixture was stirred at 110 °C until consumption of **3c**. The reaction mixture was cooled to room temperature,

extracted with ethyl acetate, washed with H<sub>2</sub>O and brine, dried over anhydrous Na<sub>2</sub>SO<sub>4</sub> and concentrated under vacuum after filtration. Purification by flash column chromatography on silica gel (EtOAc/PE = 1/100) afforded the product **4c** as a yellowish oil (44.0 mg, 64%).

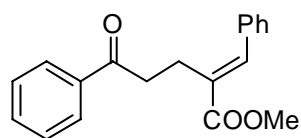

**4a**, 84% yield; *E/Z* > 95/5 (determined by crude <sup>1</sup>H NMR); <sup>1</sup>H NMR (400 MHz, CDCl<sub>3</sub>): δ = 7.99-7.96 (m, 2H), 7.77 (s, 1H), 7.58-7.31 (m, 8H), 3.84 (s, 1H), 3.25-3.21 (m, 2H), 3.00-2.96 (m, 2H) ppm; <sup>13</sup>C NMR (50 MHz, CDCl<sub>3</sub>): δ = 199.1, 168.5, 140.3, 136.7, 135.3, 133.0, 131.7, 129.2, 128.7, 128.6, 128.1, 52.1, 38.0, 22.7 ppm; ESI-HRMS: calcd. for C<sub>19</sub>H<sub>18</sub>O<sub>3</sub>+Na 317.1154, found 317.1154.

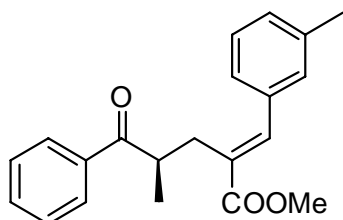

**4b**, 62% yield; *E/Z* > 95/5 (determined by crude <sup>1</sup>H NMR); [ $\alpha$ ]<sub>D</sub><sup>20</sup> = +63.93 (*c* = 1.50 in CHCl<sub>3</sub>); 80% ee, determined by HPLC analysis [Daicel Chiralpak AD, *n*-hexane/*i*-PrOH = 95/5, 1.0 mL/min, λ = 254 nm, *t* (major) = 7.500 min, *t* (minor) = 7.069 min]; <sup>1</sup>H NMR (400 MHz, CDCl<sub>3</sub>): δ = 7.98-7.96 (m, 2H), 7.77 (s, 1H), 7.56-7.13 (m, 7H), 3.87-3.81 (m, 4H), 2.95 (dd, *J* = 9.6 Hz, 4.8 Hz, 1H), 2.81 (dd, *J* = 13.6 Hz, 9.2 Hz, 1H), 2.35 (s, 3H), 1.08 (d, *J* = 6.8 Hz, 3H) ppm; <sup>13</sup>C NMR (100 MHz, CDCl<sub>3</sub>): δ = 203.7, 168.6, 141.7, 138.1, 136.2, 135.4, 132.9, 130.5, 129.7, 129.2, 128.5, 128.4, 128.4, 126.0, 52.0, 39.6, 30.8, 21.4, 16.2 ppm; ESI-HRMS: calcd. for C<sub>21</sub>H<sub>22</sub>O<sub>3</sub>+Na 345.1467, found 345.1469.

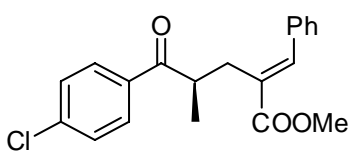

**4c**, 64% yield; *E/Z* = 89/11 (determined by crude <sup>1</sup>H NMR); [ $\alpha$ ]<sub>D</sub><sup>20</sup> = +61.63 (*c* = 3.00 in CHCl<sub>3</sub>); 82% ee, determined by HPLC analysis [Daicel Chiralpak AD, *n*-hexane/*i*-PrOH = 95/5, 1.0 mL/min, λ = 254 nm, *t* (major) = 11.424 min, *t* (minor) = 10.065 min]; <sup>1</sup>H NMR (400 MHz, CDCl<sub>3</sub>): δ = 7.95-7.90 (m, 2H), 7.80 (s, 1H), 7.45-7.31 (m, 7H), 3.82-3.76 (m, 4H), 2.92 (dd, *J* = 13.6 Hz, 5.2 Hz, 1H), 2.78 (dd, *J* = 14.0 Hz, 5.2 Hz, 1H), 1.06 (d, *J* = 6.8 Hz, 3H) ppm; <sup>13</sup>C NMR (100 MHz, CDCl<sub>3</sub>): δ = 202.4, 168.5, 141.7, 139.3, 136.7, 135.3, 134.5, 130.4, 129.9, 129.0, 128.6, 128.0, 52.1, 39.6, 30.8, 16.0 ppm; ESI-HRMS: calcd. for C<sub>20</sub>H<sub>19</sub>ClO<sub>3</sub>+Na 365.0920, found 365.0924.

**4d**, 58% yield; *E/Z* > 95/5 (determined by crude <sup>1</sup>H NMR); [ $\alpha$ ]<sub>D</sub><sup>20</sup> = +23.5 (*c* = 2.75 in CH<sub>2</sub>Cl<sub>2</sub>); 80% ee, determined by HPLC analysis [Daicel Chiralcel AD, *n*-hexane/*i*-PrOH = 95/5, 1.0 mL/min, λ = 254 nm, *t*

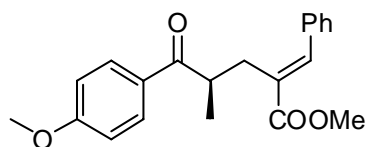

(major) = 20.158 min, t (minor) = 16.242 min];  $^1\text{H}$  NMR (400 MHz,  $\text{CDCl}_3$ ):  $\delta$  = 7.98-7.96 (m, 2H), 7.79 (s, 1H), 7.41-7.26 (m, 5H), 6.94-6.91 (m, 2H), 3.88-3.77 (m, 7H), 2.92 (dd,  $J$  = 13.6 Hz, 5.2 Hz, 1H), 2.80 (dd,  $J$  = 13.6 Hz, 5.2 Hz, 1H), 1.06 (d,  $J$  = 6.8 Hz, 3H) ppm;  $^{13}\text{C}$  NMR (100 MHz,  $\text{CDCl}_3$ ):  $\delta$  = 202.2, 168.7, 163.4, 141.5, 135.5, 130.8, 130.8, 129.2, 129.1, 128.6, 128.5, 113.7, 55.4, 52.1, 39.2, 31.0, 16.2 ppm; ESI-HRMS: calcd. for  $\text{C}_{21}\text{H}_{22}\text{O}_4 + \text{Na}$  361.1416, found 361.1417.

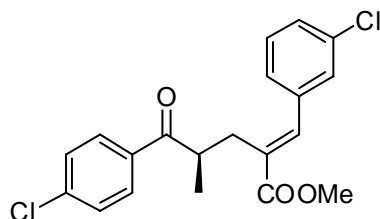

**4e**, 55% yield;  $E/Z$  > 95/5 (determined by crude  $^1\text{H}$  NMR);  $[\alpha]_{\text{D}}^{20}$  = +63.36 ( $c$  = 0.72 in  $\text{CHCl}_3$ ); 59% ee, determined by HPLC analysis [Daicel Chiralpak AD,  $n$ -hexane/ $i$ -PrOH = 95/5, 1.0 mL/min,  $\lambda$  = 254 nm, t (major) = 9.193 min, t (minor) = 7.859 min];  $^1\text{H}$  NMR (400 MHz,  $\text{CDCl}_3$ ):  $\delta$  = 7.92-7.90 (m, 2H), 7.71 (s, 1H), 7.44-7.42 (m, 2H), 7.33-7.22 (m, 4H), 3.83-3.76 (m, 4H), 2.91 (dd,  $J$  = 13.6 Hz, 5.2 Hz, 1H), 2.70 (dd,  $J$  = 14.0 Hz, 5.2 Hz, 1H), 1.06 (d,  $J$  = 6.8 Hz, 3H) ppm;  $^{13}\text{C}$  NMR (100 MHz,  $\text{CDCl}_3$ ):  $\delta$  = 202.1, 168.1, 140.0, 139.4, 137.1, 134.5, 134.4, 131.8, 129.9, 128.9, 128.9, 128.5, 126.9, 52.2, 39.5, 30.9, 16.2 ppm; ESI-HRMS: calcd. for  $\text{C}_{20}\text{H}_{18}\text{Cl}_2\text{O}_3 + \text{Na}$  399.0531, found 399.0529.

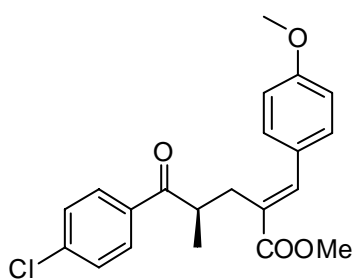

**4f**, 72% yield;  $E/Z$  > 95/5 (determined by crude  $^1\text{H}$  NMR);  $[\alpha]_{\text{D}}^{20}$  = +79.81 ( $c$  = 2.70 in  $\text{CHCl}_3$ ); 88% ee, determined by HPLC analysis [Daicel Chiralpak AD,  $n$ -hexane/ $i$ -PrOH = 95/5, 1.0 mL/min,  $\lambda$  = 254 nm, t (major) = 15.641 min, t (minor) = 14.417 min];  $^1\text{H}$  NMR (400 MHz,  $\text{CDCl}_3$ ):  $\delta$  = 7.94-7.92 (m, 2H), 7.73 (s, 1H), 7.43-7.36 (m, 4H), 6.92-6.90 (m, 2H), 3.89-3.81 (m, 7H), 2.94 (dd,  $J$  = 13.6 Hz, 5.2 Hz, 1H), 2.84 (dd,  $J$  = 13.6 Hz, 5.2 Hz, 1H), 1.09 (d,  $J$  = 6.8 Hz, 3H) ppm;  $^{13}\text{C}$  NMR (100 MHz,  $\text{CDCl}_3$ ):  $\delta$  = 202.6, 168.7, 159.9, 141.4, 139.3, 134.6, 130.9, 129.9, 128.8, 128.2, 127.6, 114.0, 55.3, 52.0, 39.6, 30.9, 16.1 ppm; ESI-HRMS: calcd. for  $\text{C}_{21}\text{H}_{21}\text{ClO}_4 + \text{Na}$  395.1026, found 395.1029.

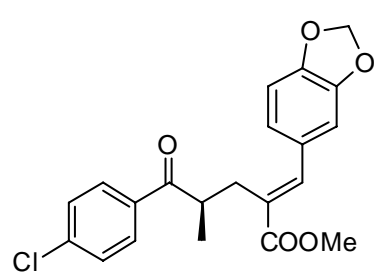

**4g**, 66% yield; *E/Z* > 95/5 (determined by crude  $^1\text{H}$  NMR);  $[\alpha]_{\text{D}}^{20} = +89.12$  ( $c = 2.50$  in  $\text{CHCl}_3$ ); 85% ee, determined by HPLC analysis [Daicel Chiralpak AD, *n*-hexane/*i*-PrOH = 95/5, 1.0 mL/min,  $\lambda = 254$  nm,  $t$  (major) = 21.284 min,  $t$  (minor) = 16.159 min];  $^1\text{H}$  NMR (400 MHz,  $\text{CDCl}_3$ ):  $\delta = 7.95\text{--}7.92$  (m, 2H), 7.69 (s, 1H), 7.44–7.41 (m, 2H), 6.90–6.81 (m, 3H), 6.00 (s, 2H), 3.84–3.80 (m, 4H), 2.92 (dd,  $J = 14.0$  Hz, 5.2 Hz, 1H), 2.79 (dd,  $J = 13.6$  Hz, 5.2 Hz, 1H), 1.09 (d,  $J = 6.8$  Hz, 3H) ppm;  $^{13}\text{C}$  NMR (100 MHz,  $\text{CDCl}_3$ ):  $\delta = 202.5, 168.6, 147.9, 147.8, 141.4, 139.3, 134.5, 129.9, 129.1, 128.9, 128.9, 124.0, 109.1, 108.5, 101.4, 52.0, 39.6, 30.9, 16.1$  ppm; ESI-HRMS: calcd. for  $\text{C}_{21}\text{H}_{19}\text{ClO}_5 + \text{Na}$  409.0819, found 409.0822.

### Speculation of the absolute configuration of aza-Cope rearrangement products.

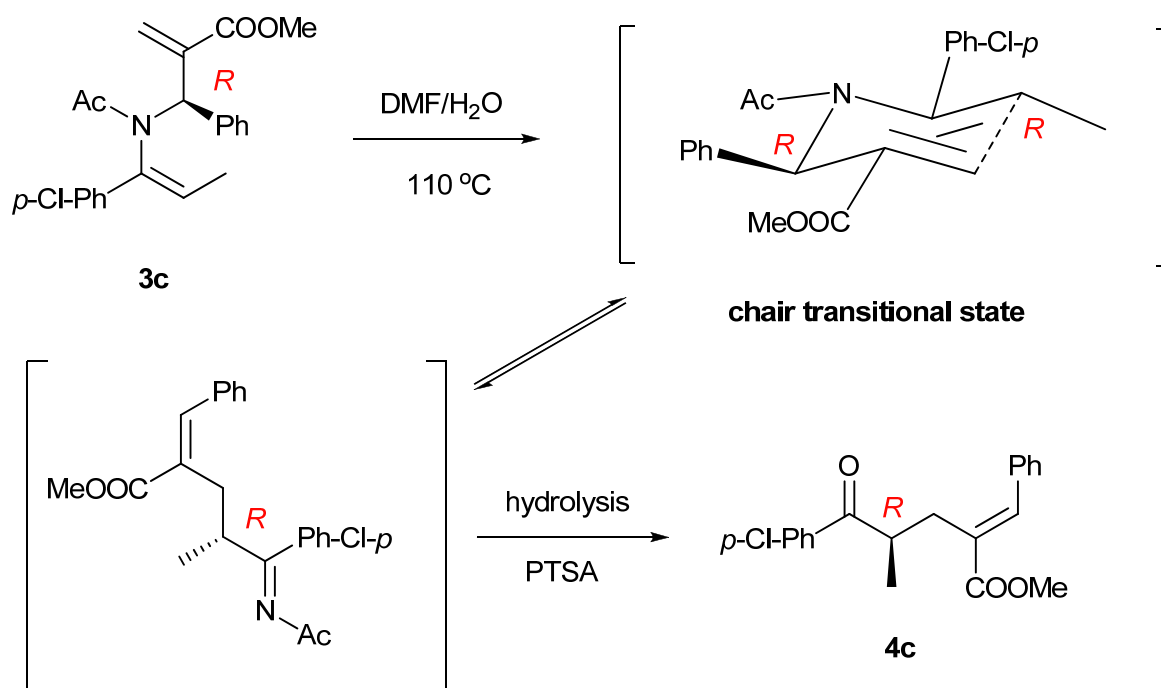

Currently we are not successful to obtain the crystals suitable for the assignment of the absolute configuration of the chiral ketone products **4** by X-ray analysis. Nevertheless, based on the concerted mechanism of aza-Cope rearrangement, we proposed the possible configuration. The *N*-alkylation product **3c** prefers to undergo the [3,3]-sigmatropic rearrangement process through the chair transition state, in which the aryl group orients pseudoequatorially, as shown in the above scheme. Thus the newly generated chiral centre would be assigned to *R*.

### 4. Transformation of *N*-allyl alkylation product

To a solution of **3a** (33.5 mg, 0.1 mmol) in dry DCM (0.5 mL) was added trifluoromethanesulfonic acid (17.6  $\mu$ L, 0.2 mmol). The mixture was stirred at ambient temperature for 2 days. Then the solution was extracted with DCM, washed with aqueous NaHCO<sub>3</sub>, concentrated and purified by column chromatography on silica gel (EtOAc/PE = 1/2). **5** was obtained as a colourless oil (12.4 mg, 53%).

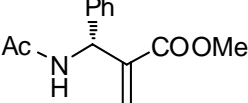 **5**, 53% yield;  $[\alpha]_D^{20} = -14.35$  ( $c = 1.15$  in CH<sub>2</sub>Cl<sub>2</sub>); 85% ee, determined by HPLC analysis [Daicel Chiralpak AD, *n*-hexane/*i*-PrOH = 80/20, 1.0 mL/min,  $\lambda = 254$  nm,  $t$  (major) = 5.932 min,  $t$  (minor) = 5.289 min]; <sup>1</sup>H NMR (400 MHz, CDCl<sub>3</sub>):  $\delta = 7.33$ -7.23 (m, 5H), 6.67-6.65 (m, 1H), 6.37 (s, 1H), 6.01 (d,  $J = 4.8$  Hz, 1H), 5.93 (s, 1H), 3.70 (s, 3H), 2.05 (s, 3H) ppm; <sup>13</sup>C NMR (100 MHz, CDCl<sub>3</sub>):  $\delta = 169.1, 166.2, 139.5, 139.0, 128.5, 127.5, 127.4, 126.4, 54.7, 51.9, 23.3$  ppm; ESI-HRMS: calcd. for C<sub>13</sub>H<sub>15</sub>NO<sub>3</sub>+Na 256.0950, found 256.0955.

## 5. Crystal data of enantiopure **3t**

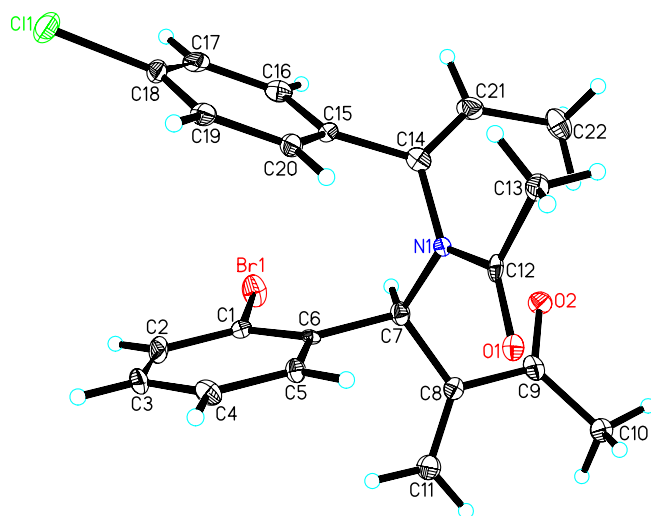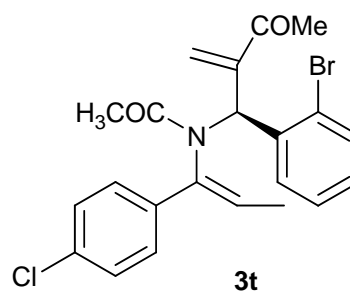

|                     |                                                        |
|---------------------|--------------------------------------------------------|
| Identification code | <b>3t</b>                                              |
| Empirical formula   | C <sub>22</sub> H <sub>21</sub> Br Cl N O <sub>2</sub> |
| Formula weight      | 446.76                                                 |
| Temperature         | 103(2) K                                               |
| Wavelength          | 0.71073 Å                                              |

|                                   |                                                                                                                        |
|-----------------------------------|------------------------------------------------------------------------------------------------------------------------|
| Crystal system, space group       | Monoclinic, P2(1)                                                                                                      |
| Unit cell dimensions              | a = 7.0532(14) Å    alpha = 90 deg.<br>b = 15.697(3) Å    beta = 99.348(3) deg.<br>c = 8.9730(19) Å    gamma = 90 deg. |
| Volume                            | 980.3(3) Å <sup>3</sup>                                                                                                |
| Z, Calculated density             | 2, 1.514 Mg/m <sup>3</sup>                                                                                             |
| Absorption coefficient            | 2.250 mm <sup>-1</sup>                                                                                                 |
| F(000)                            | 456                                                                                                                    |
| Crystal size                      | 0.43 x 0.40 x 0.30 mm                                                                                                  |
| Theta range for data collection   | 3.20 to 27.49 deg.                                                                                                     |
| Limiting indices                  | -9<=h<=9, -20<=k<=20, -9<=l<=11                                                                                        |
| Reflections collected / unique    | 9373 / 4423 [R(int) = 0.0321]                                                                                          |
| Completeness to theta = 27.49     | 99.7 %                                                                                                                 |
| Absorption correction             | Semi-empirical from equivalents                                                                                        |
| Max. and min. transmission        | 0.5517 and 0.4425                                                                                                      |
| Refinement method                 | Full-matrix least-squares on F <sup>2</sup>                                                                            |
| Data / restraints / parameters    | 4423 / 1 / 247                                                                                                         |
| Goodness-of-fit on F <sup>2</sup> | 0.795                                                                                                                  |
| Final R indices [I>2sigma(I)]     | R1 = 0.0284, wR2 = 0.0336                                                                                              |
| R indices (all data)              | R1 = 0.0353, wR2 = 0.0344                                                                                              |
| Absolute structure parameter      | 0.029(5)                                                                                                               |
| Largest diff. peak and hole       | 0.912 and -0.374 e.Å <sup>-3</sup>                                                                                     |



## 6. NMR spectra and HPLC chromatograms:

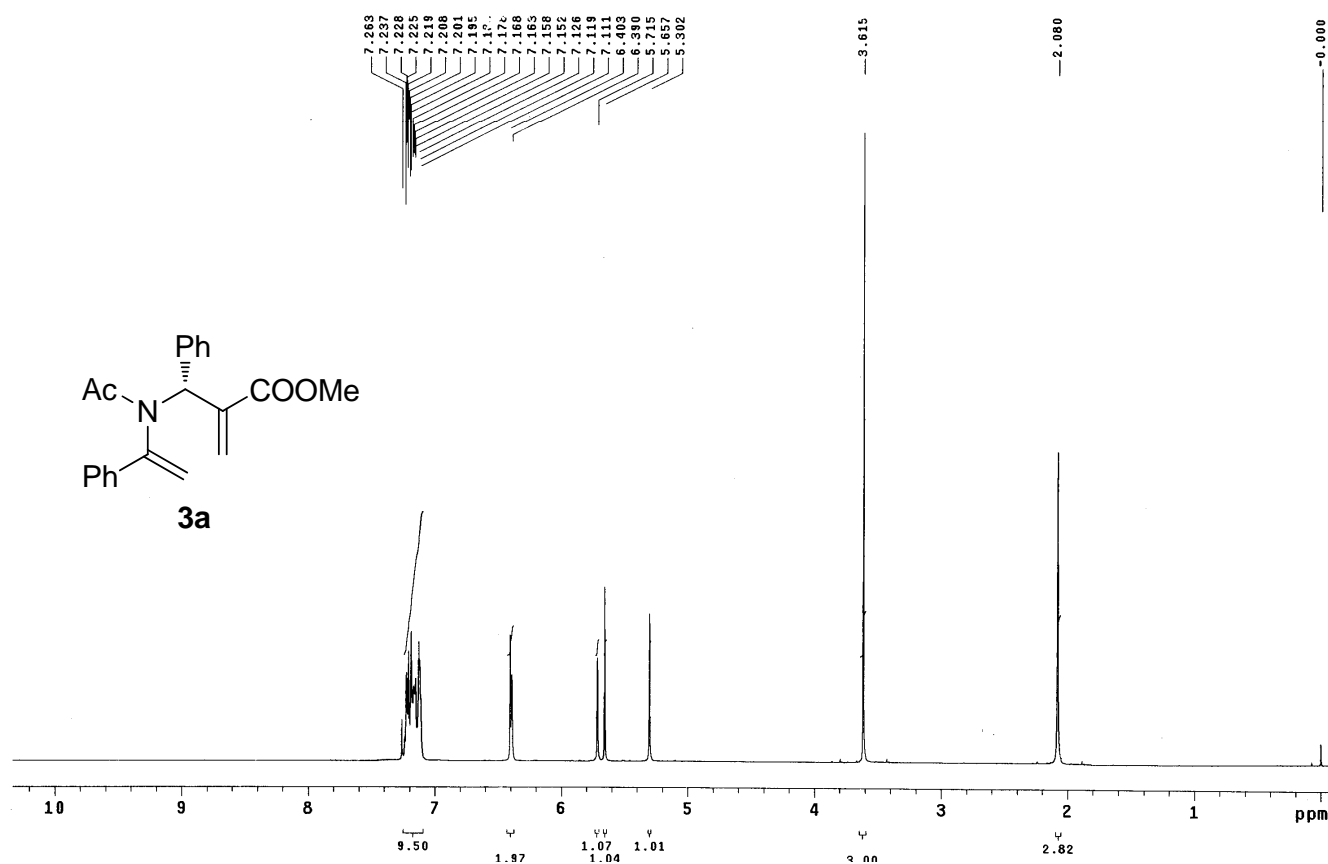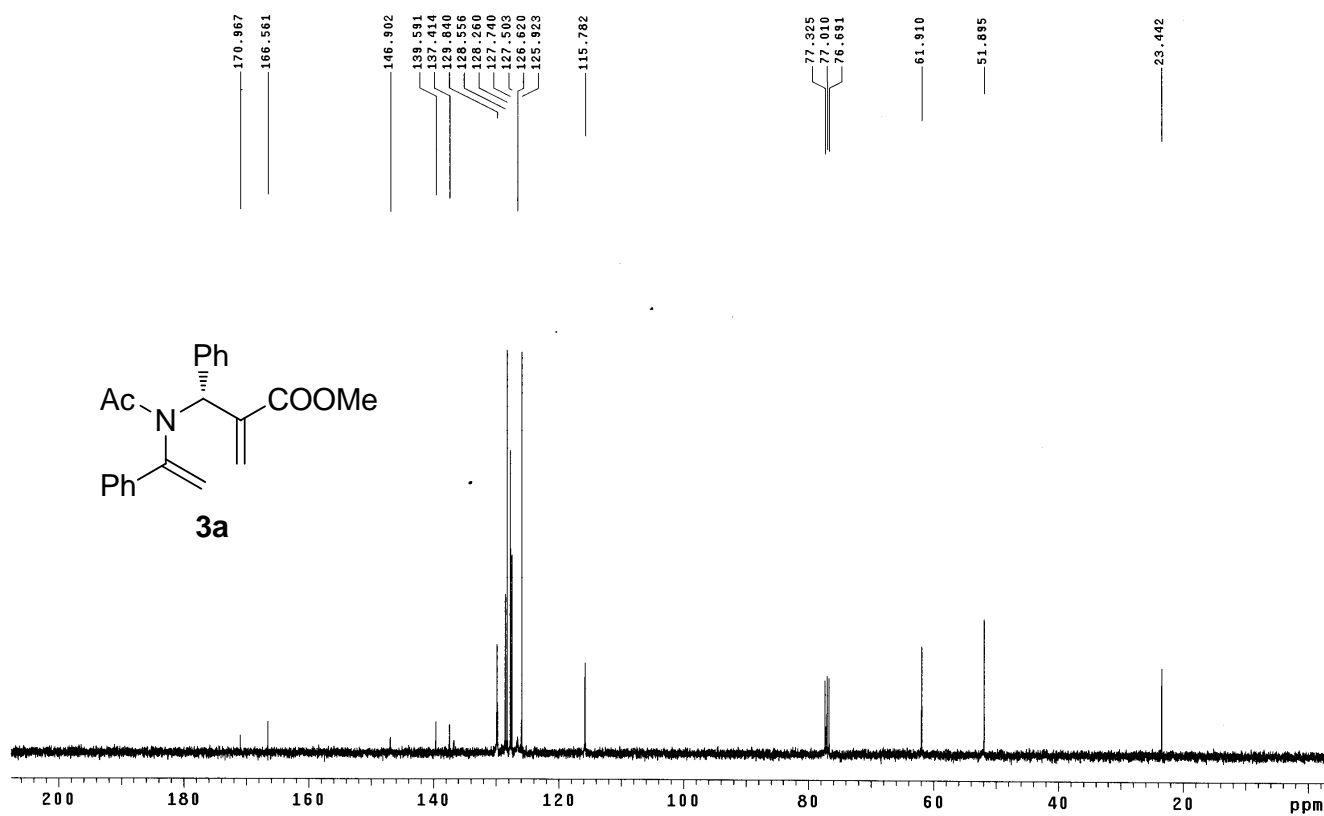

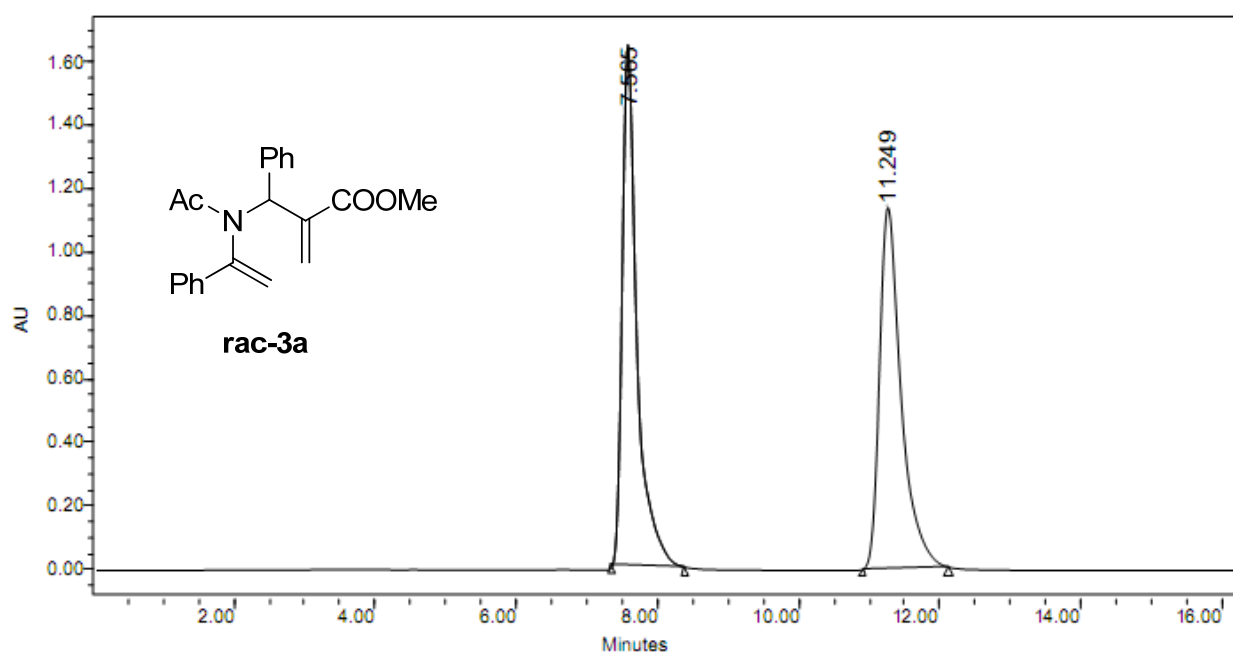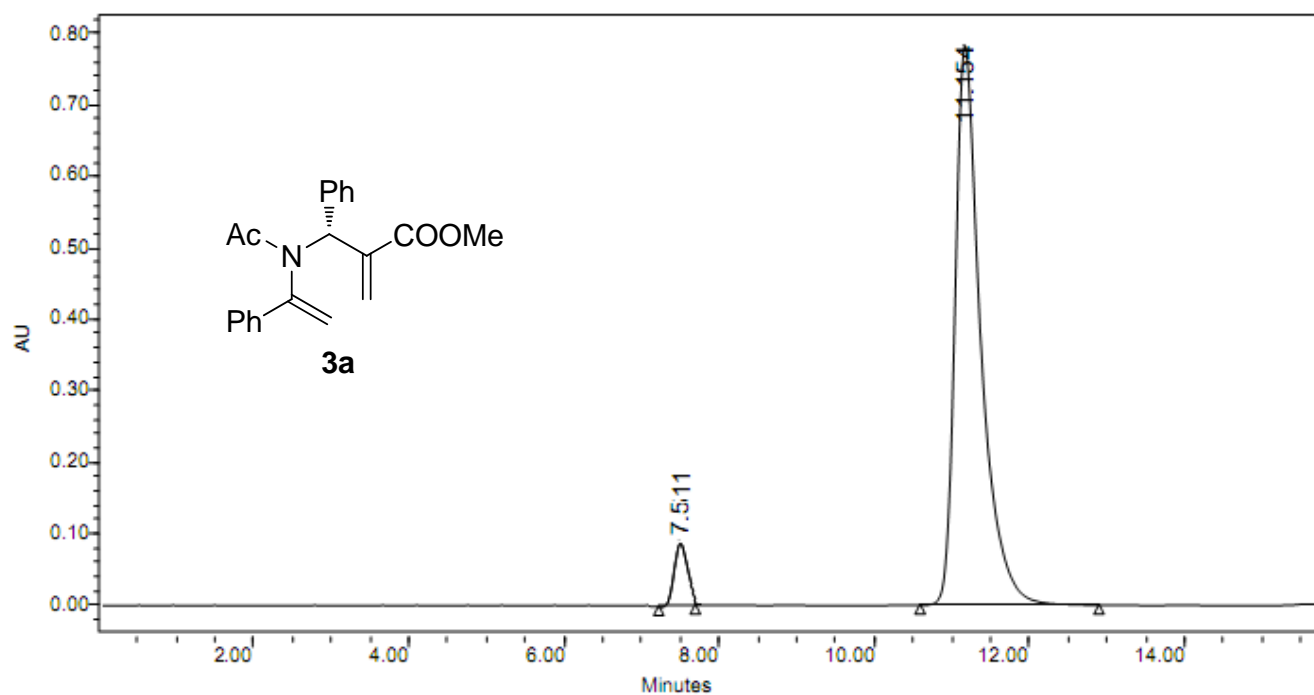

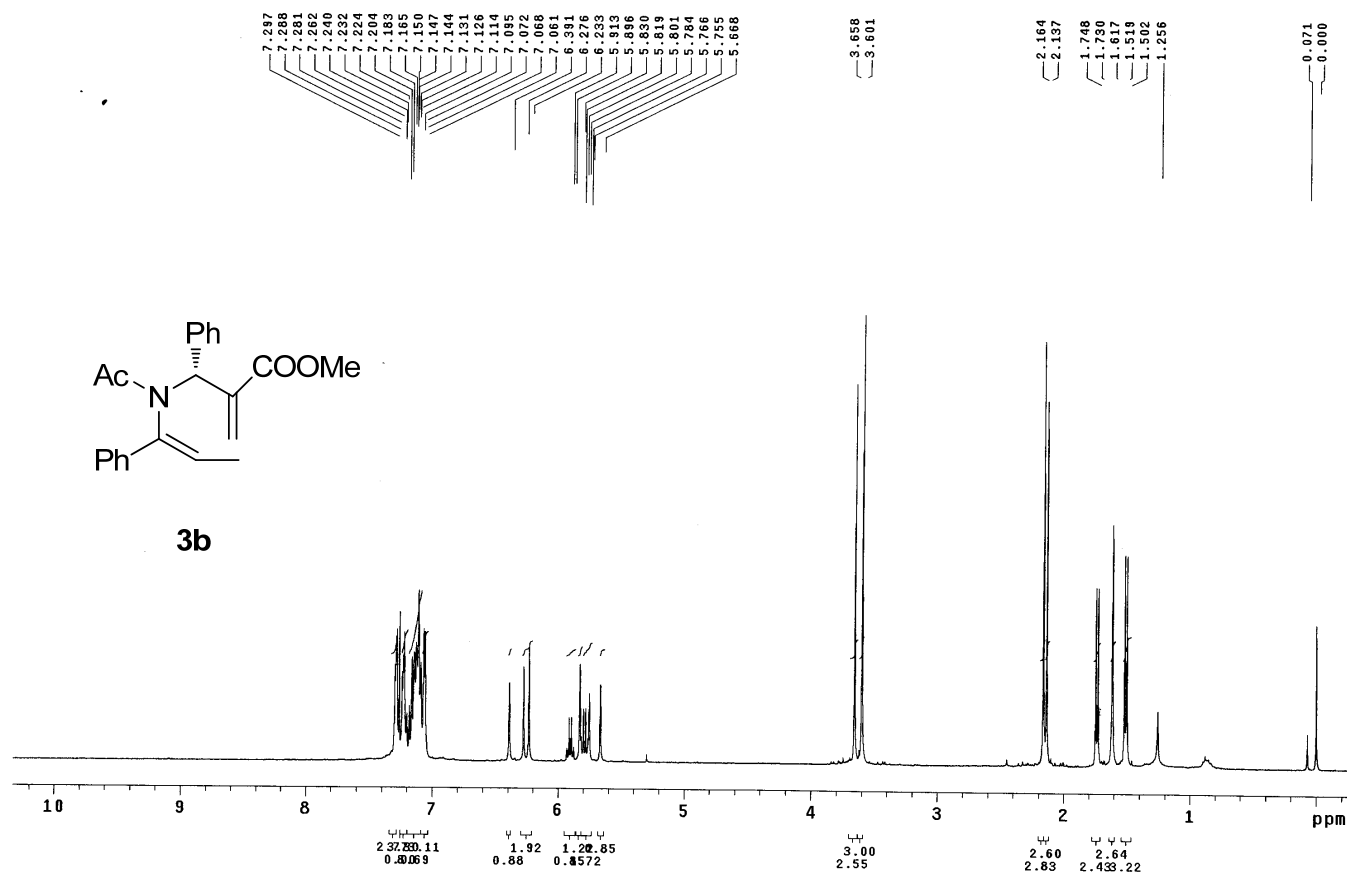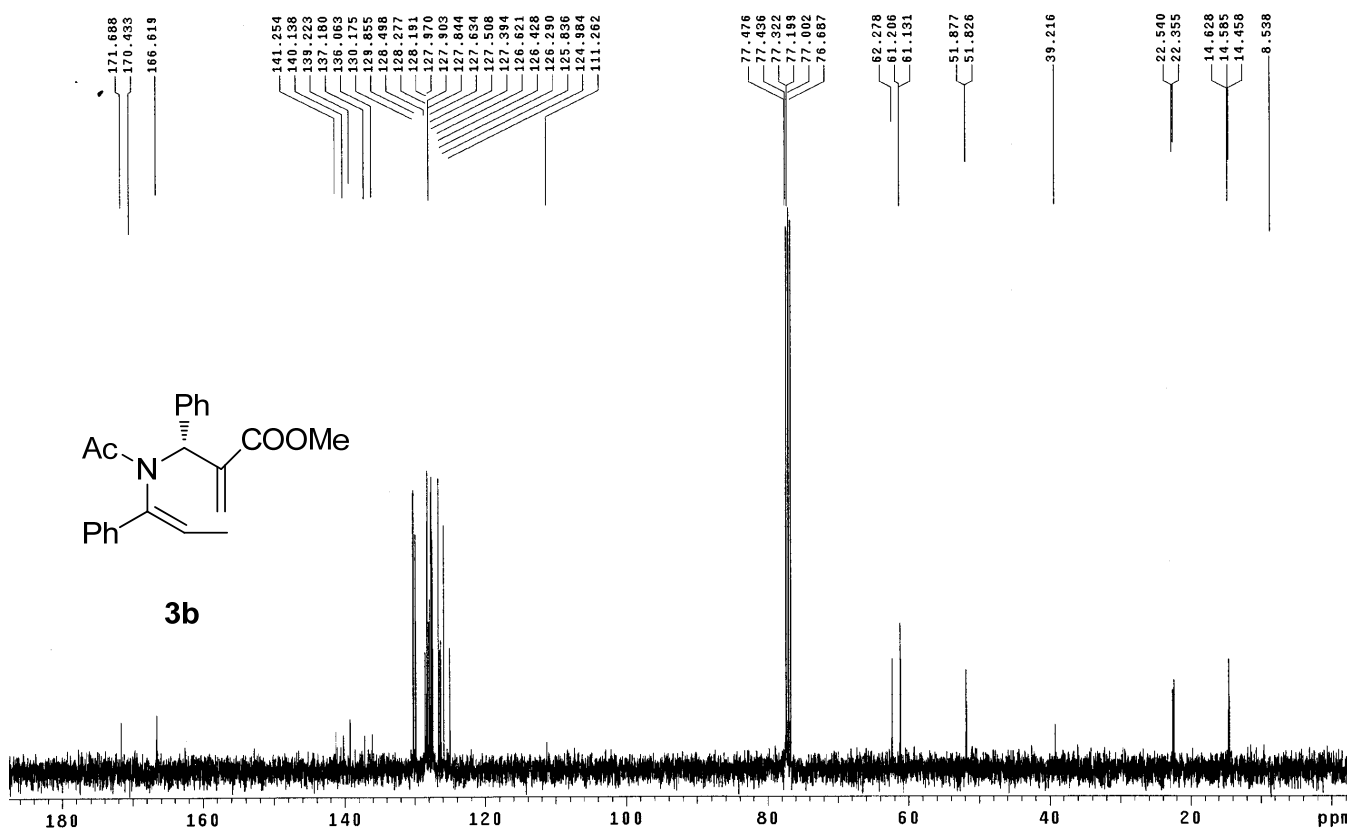

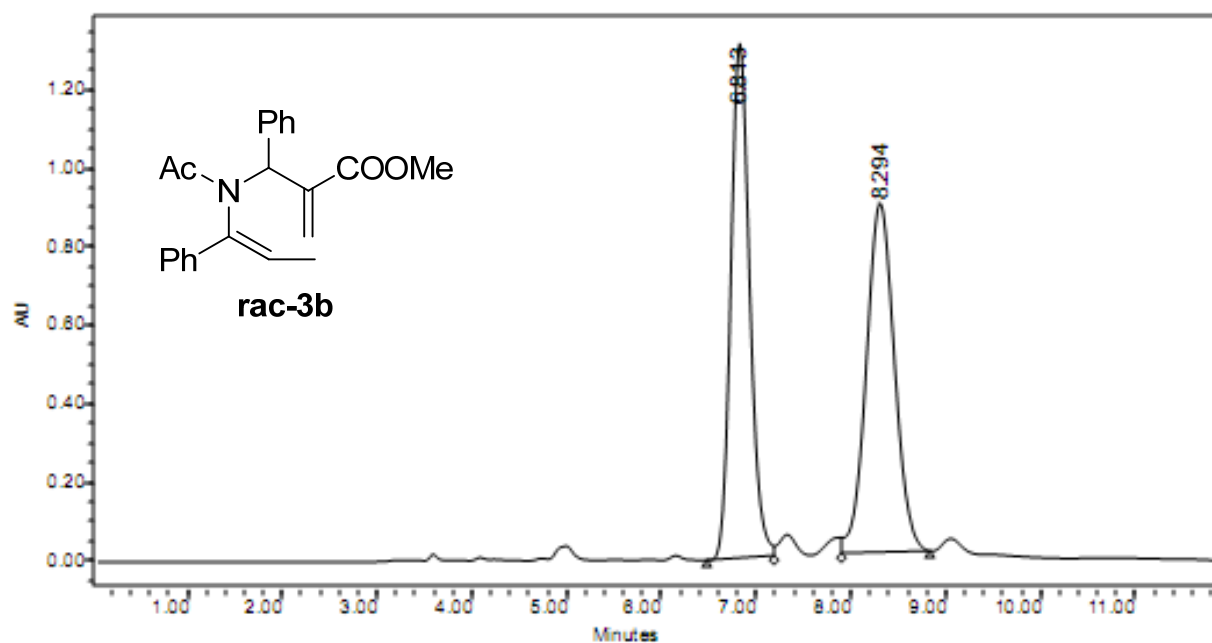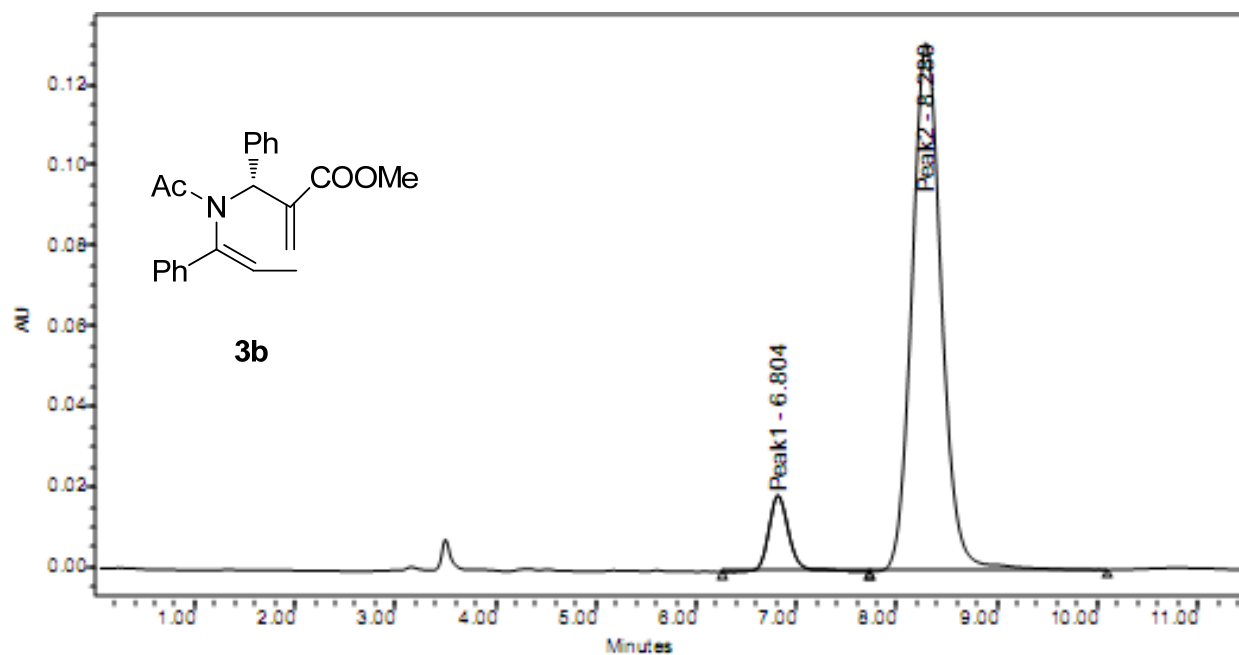

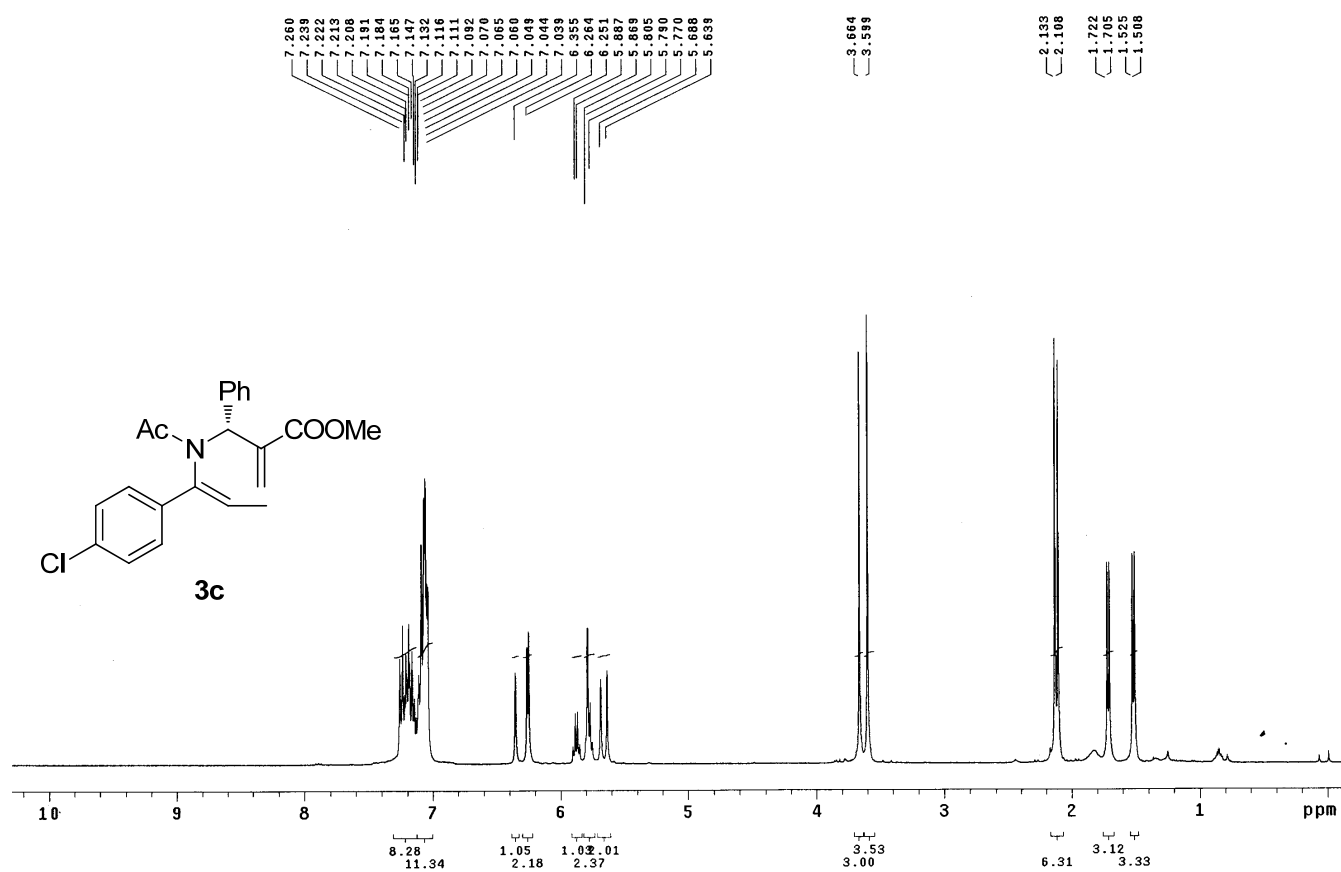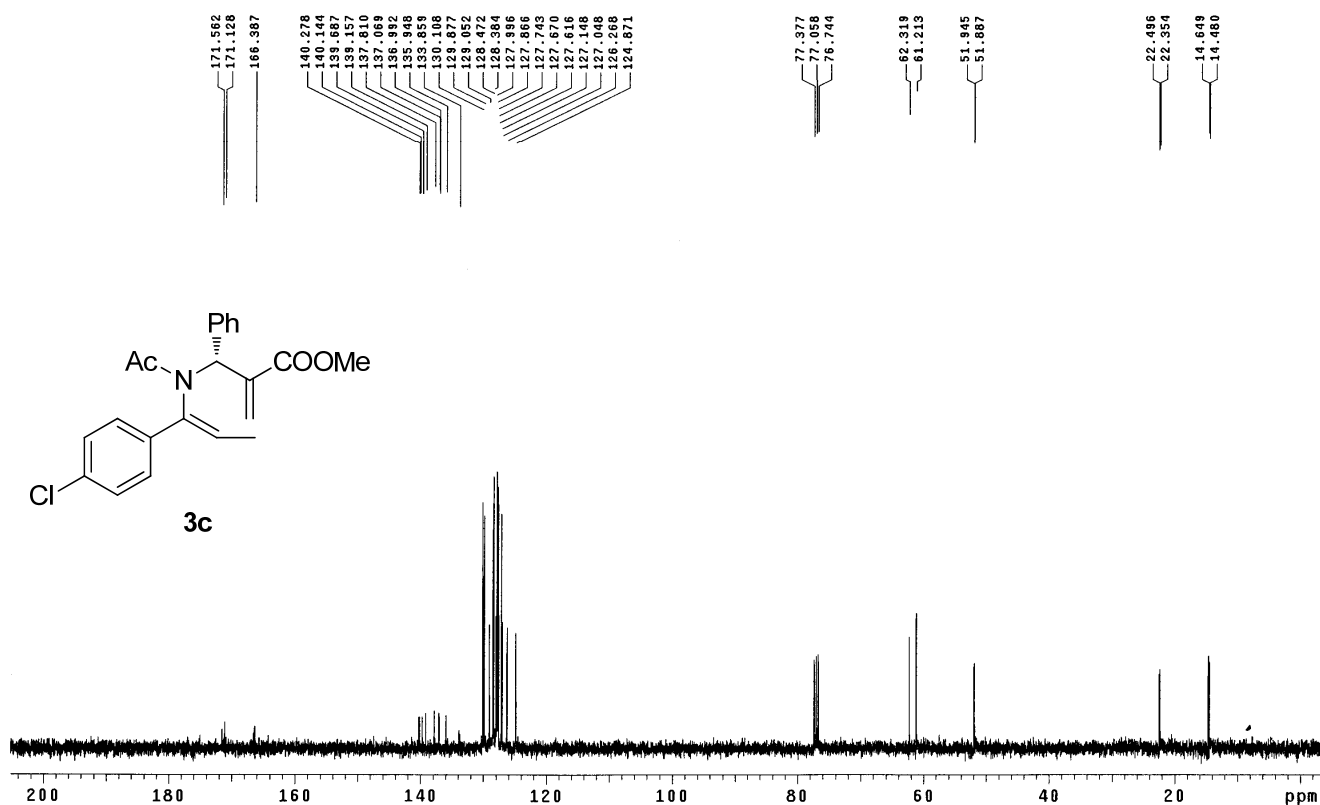

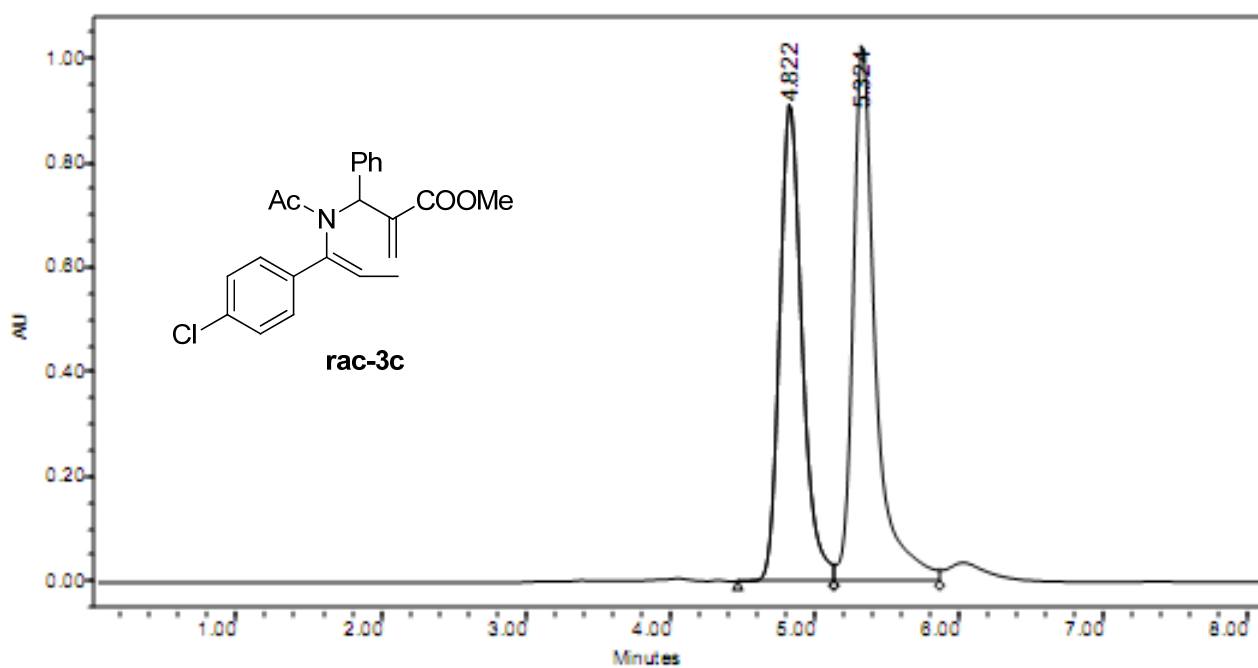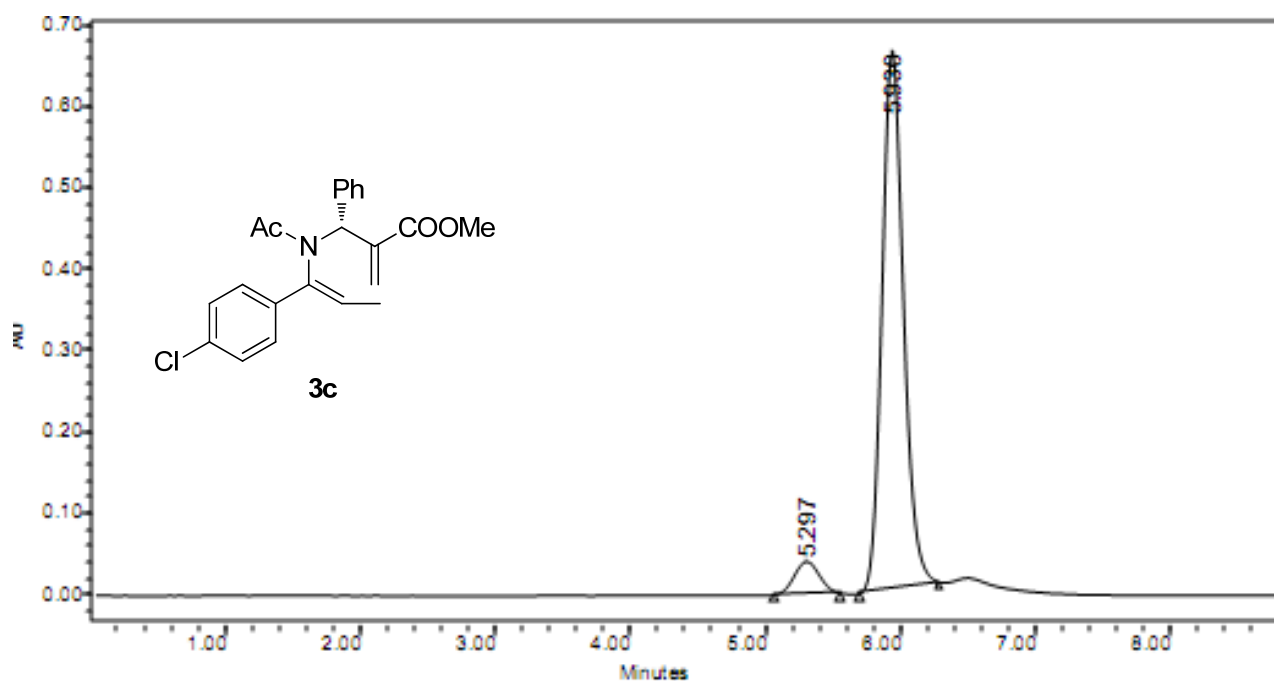

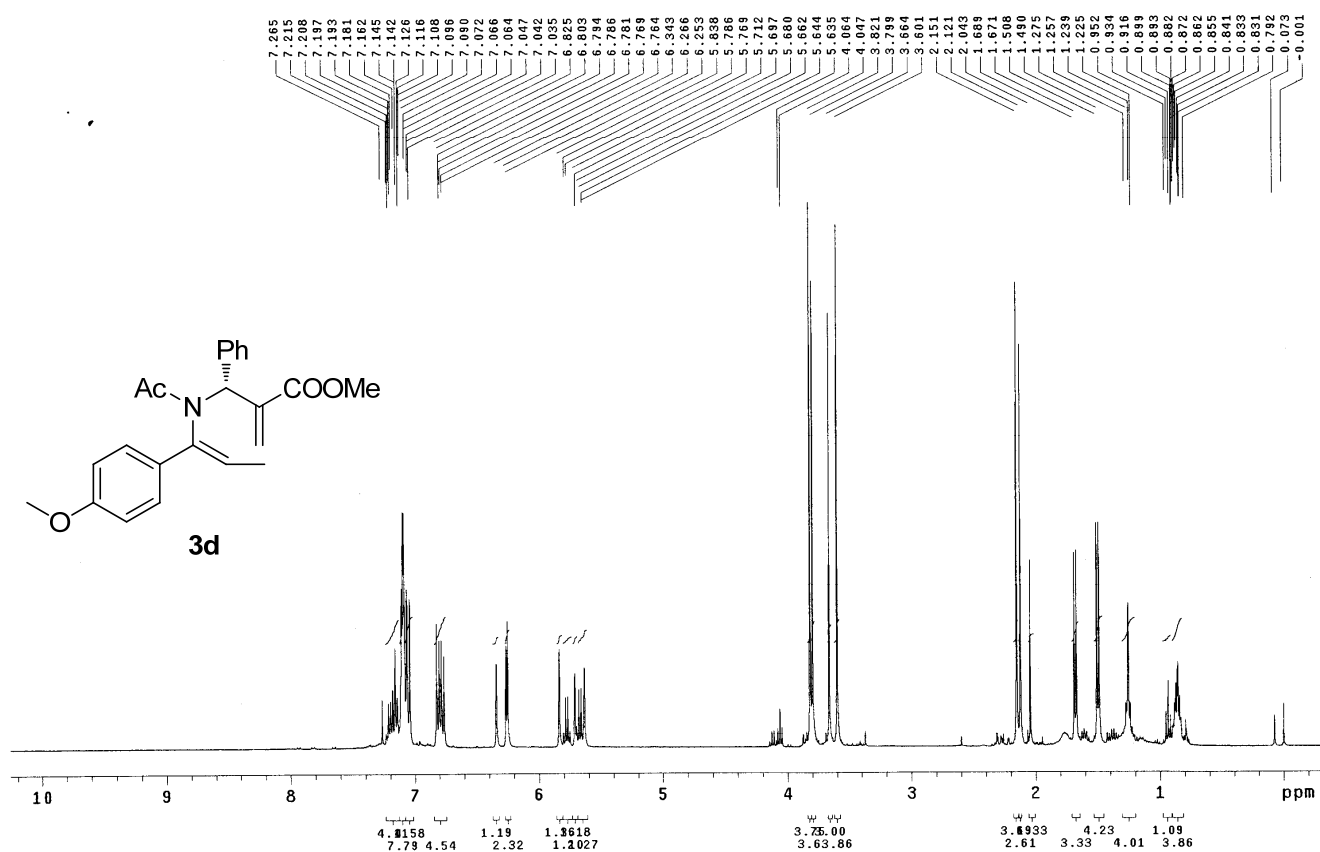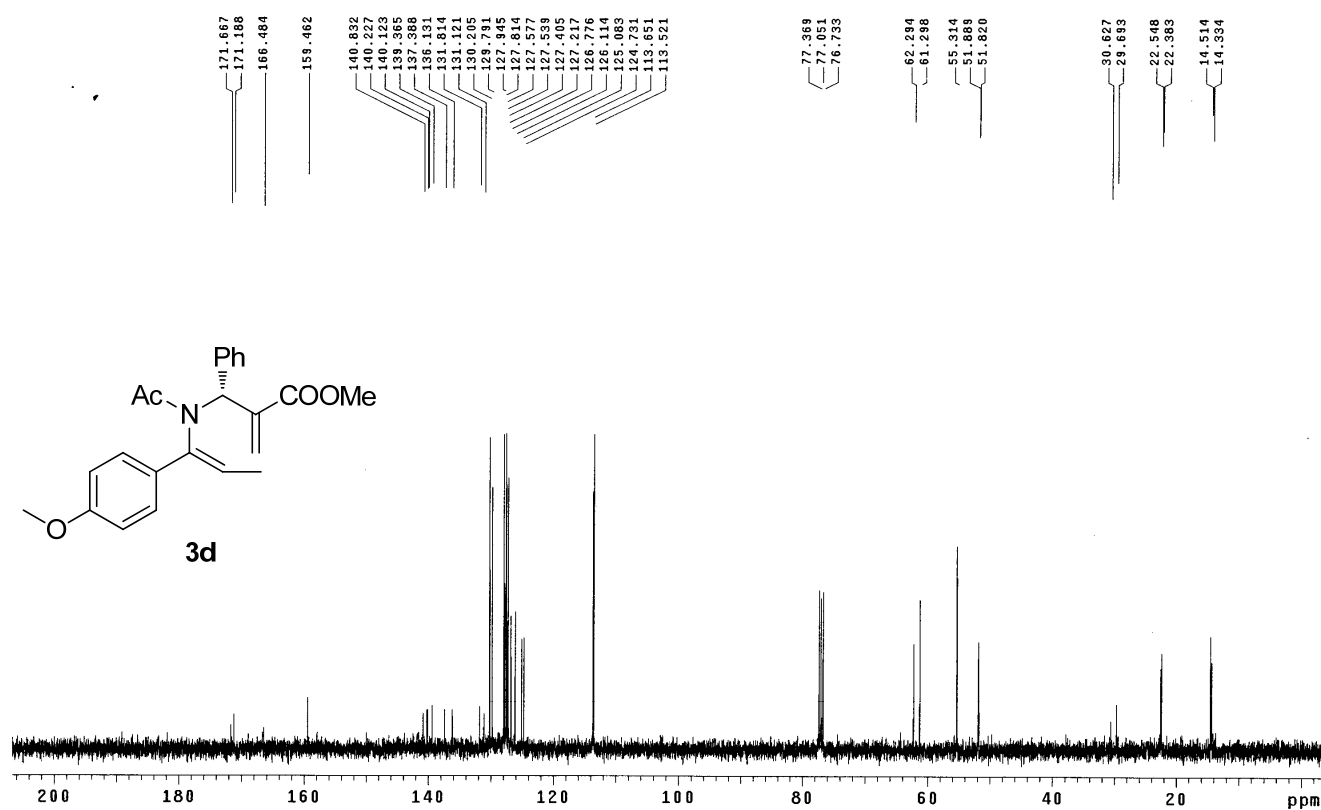

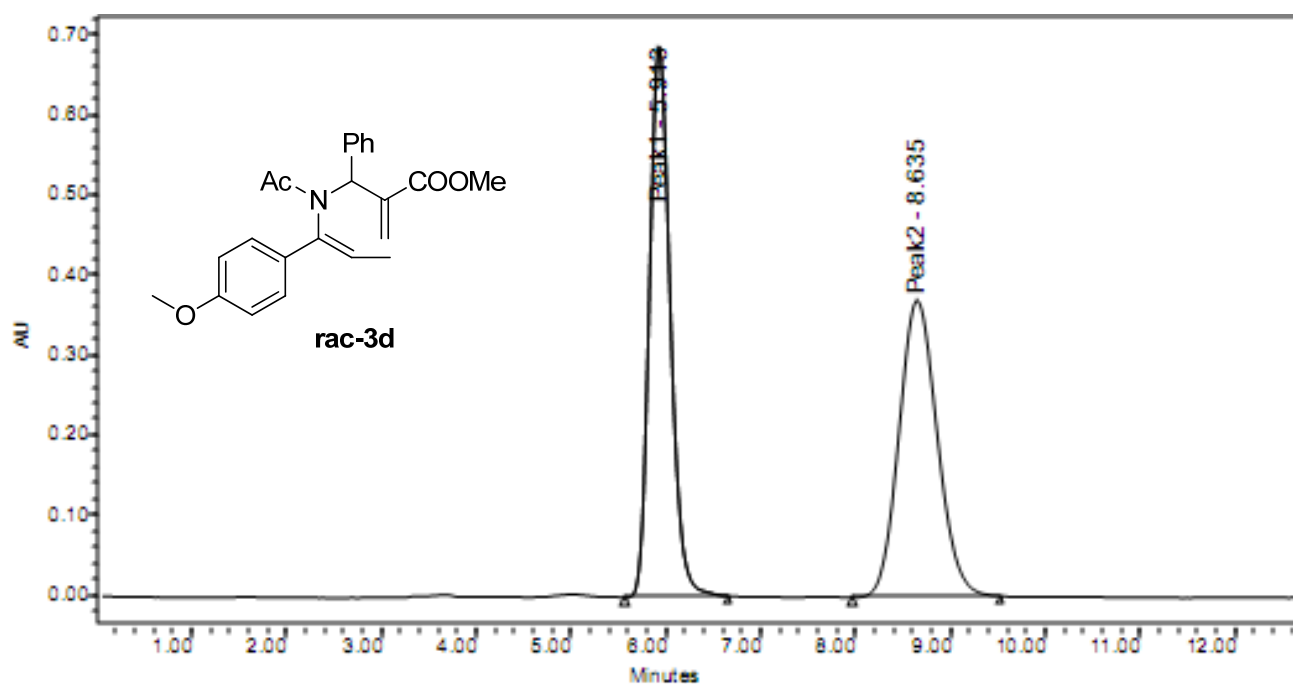

|   | Peak Name | RT (min) | Area (V *sec) | % Area | Height (V) | % Height |
|---|-----------|----------|---------------|--------|------------|----------|
| 1 | Peak1     | 5.913    | 10483837      | 50.20  | 687974     | 64.99    |
| 2 | Peak2     | 8.635    | 10401412      | 49.80  | 370646     | 35.01    |

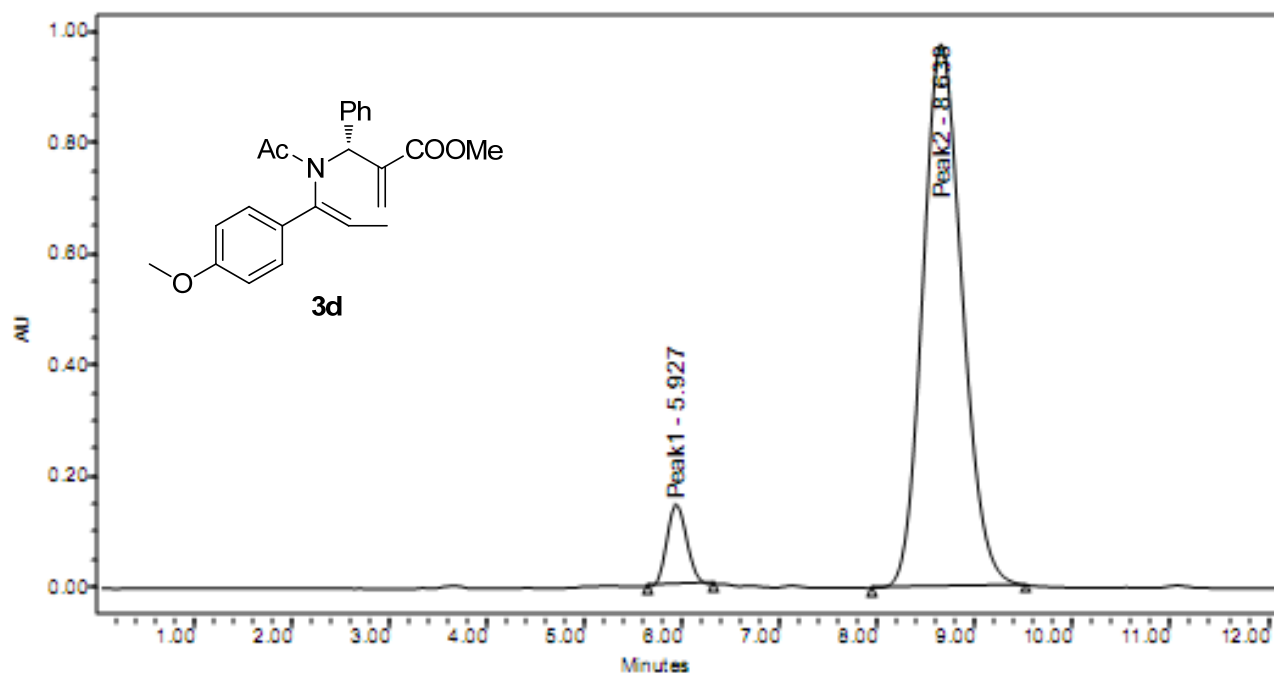

|   | Peak Name | RT (min) | Area (V *sec) | % Area | Height (V) | % Height |
|---|-----------|----------|---------------|--------|------------|----------|
| 1 | Peak1     | 5.927    | 2080576       | 7.06   | 145694     | 12.98    |
| 2 | Peak2     | 8.638    | 27392832      | 92.94  | 976331     | 87.02    |



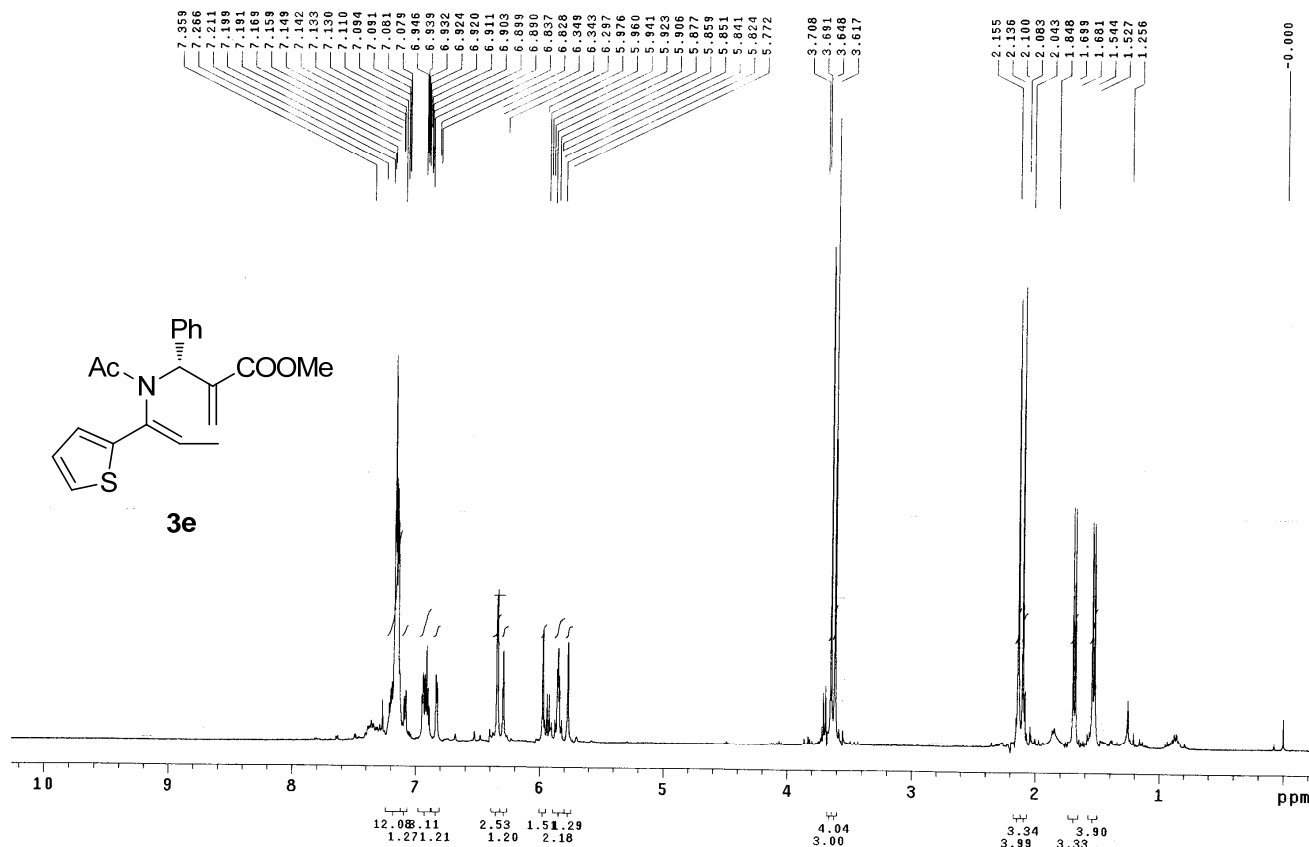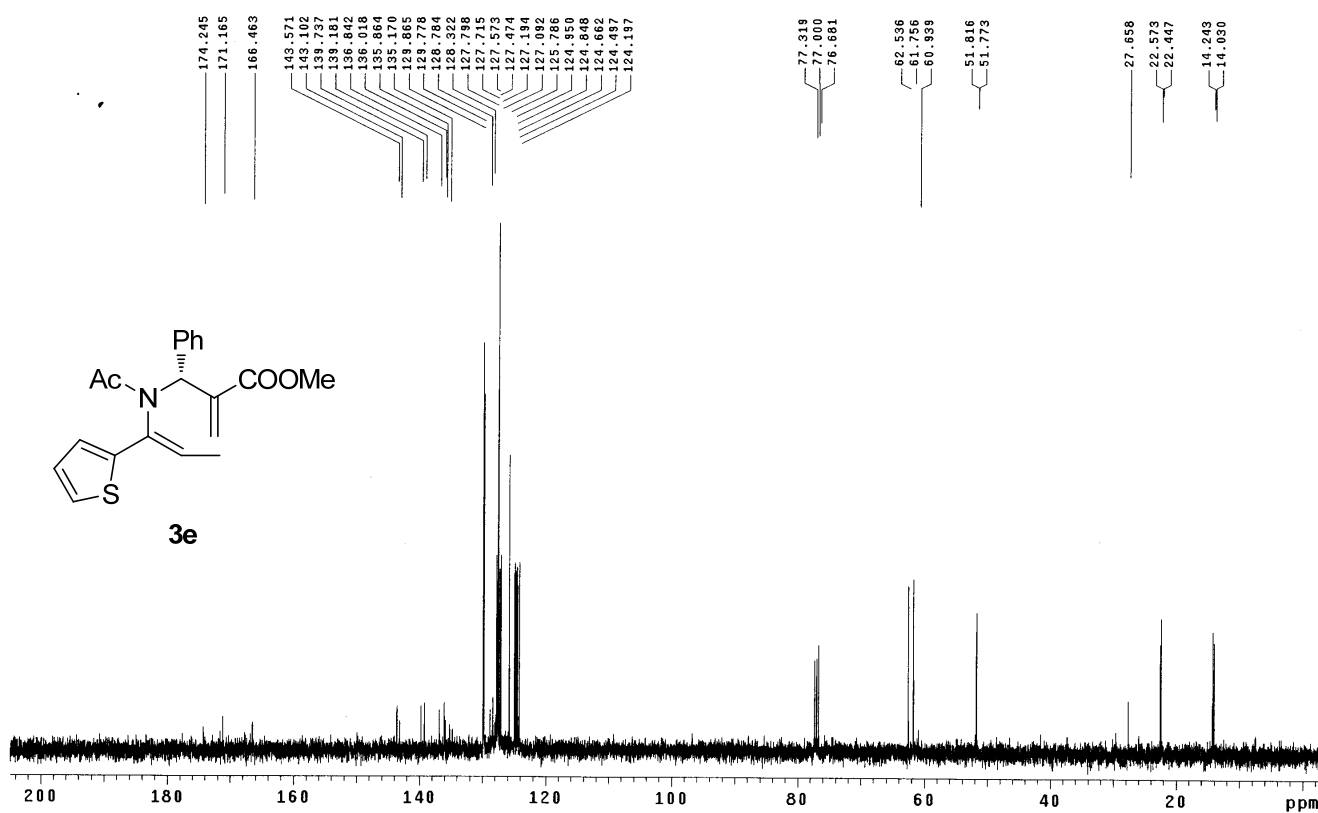

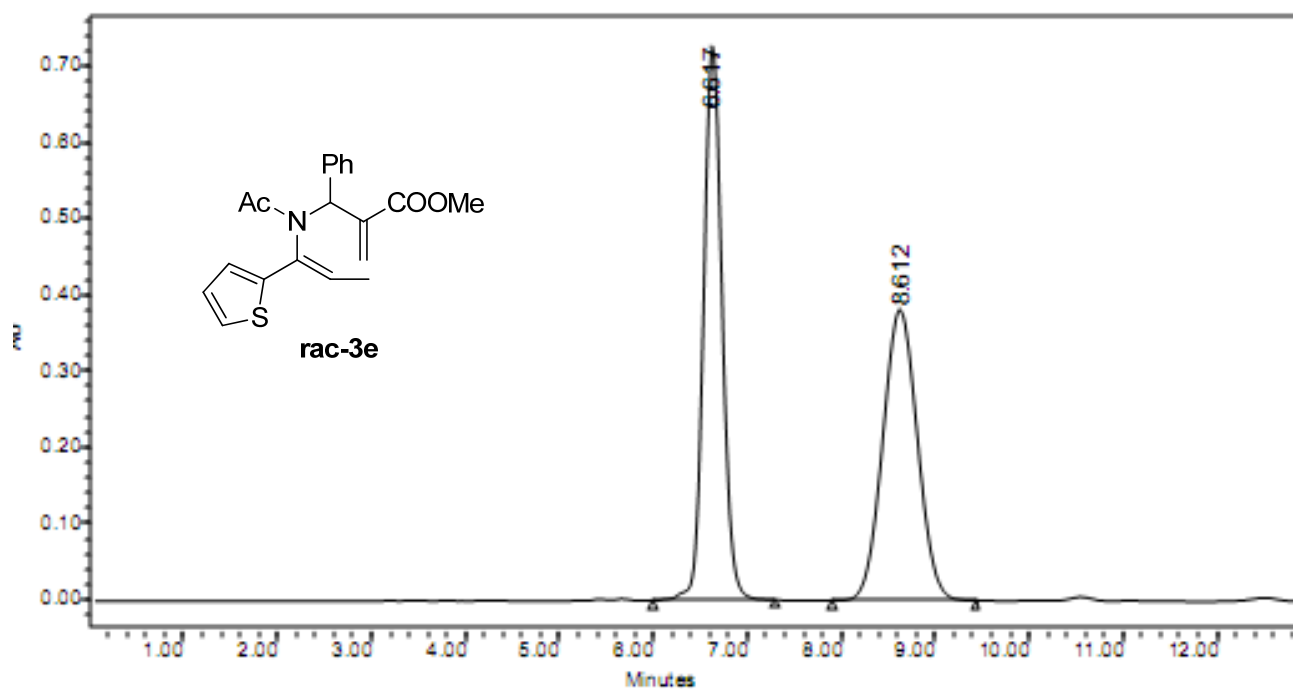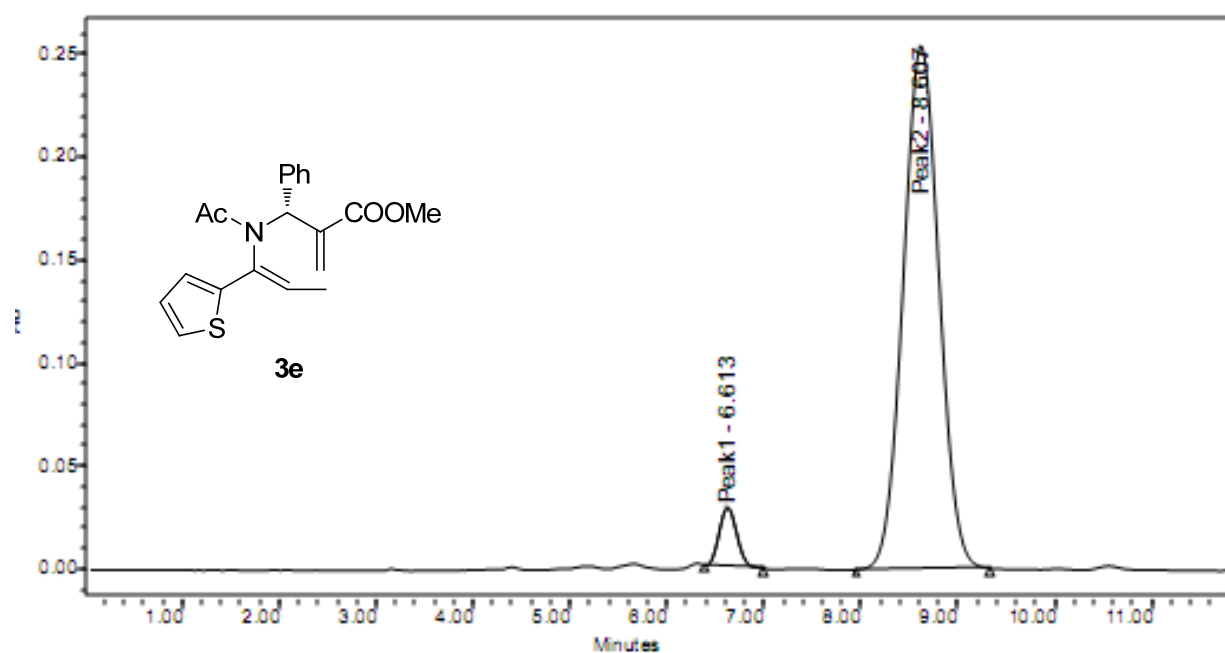

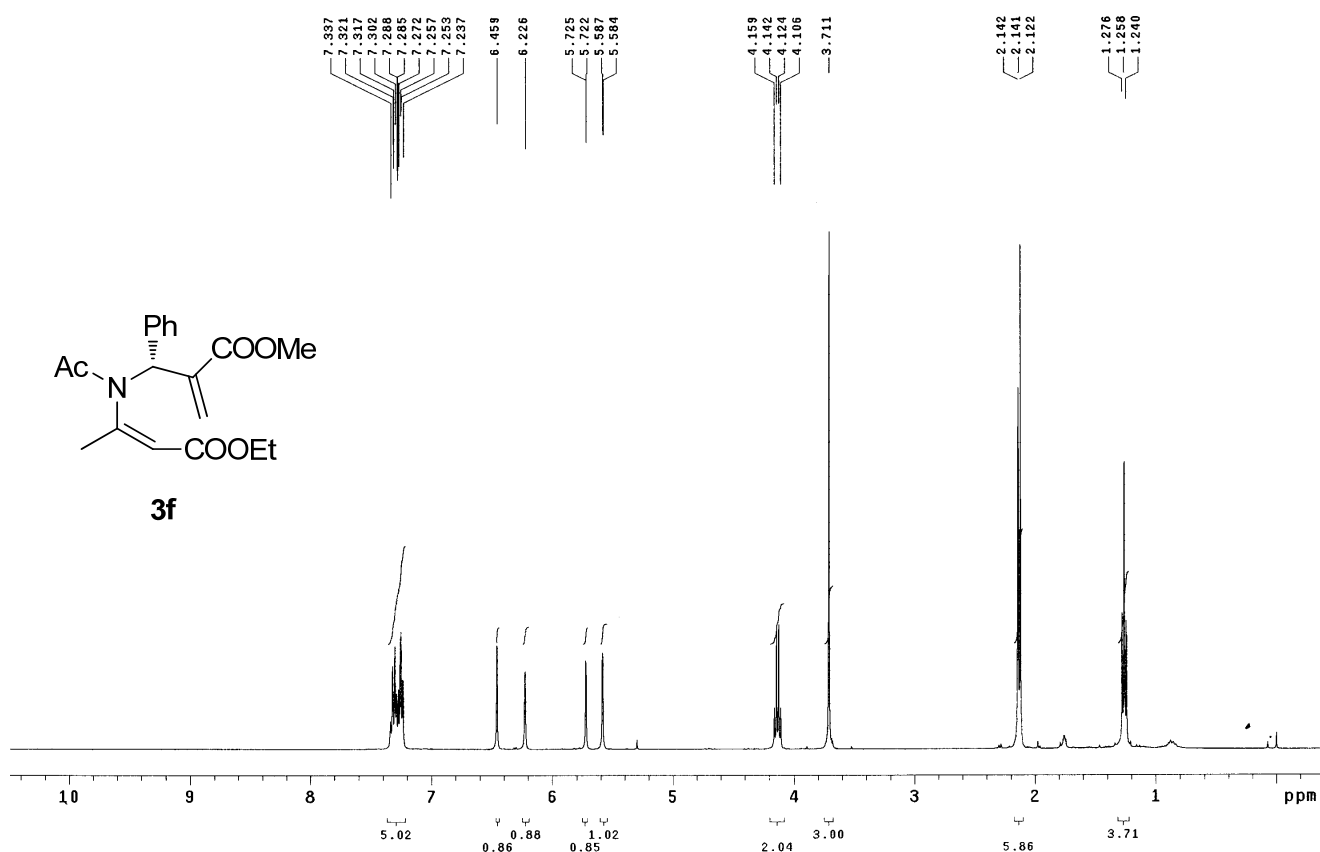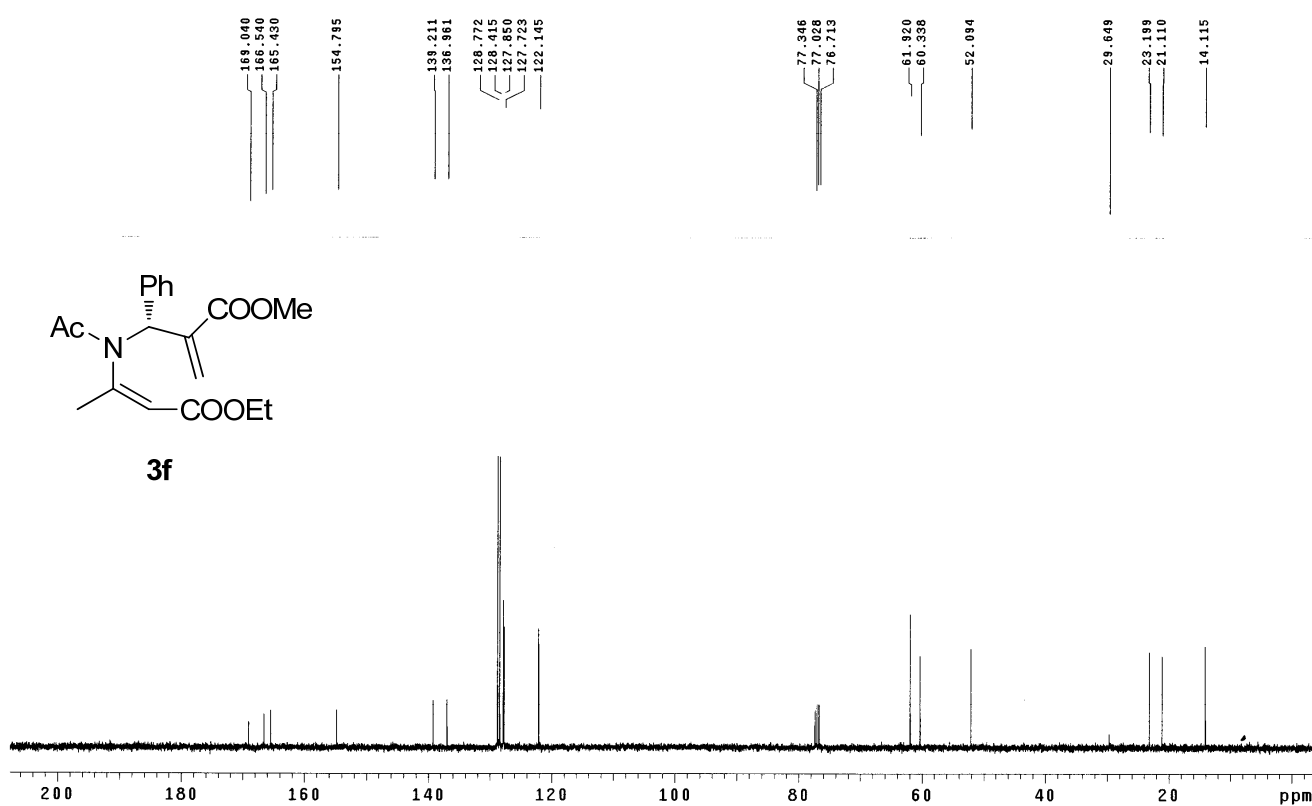

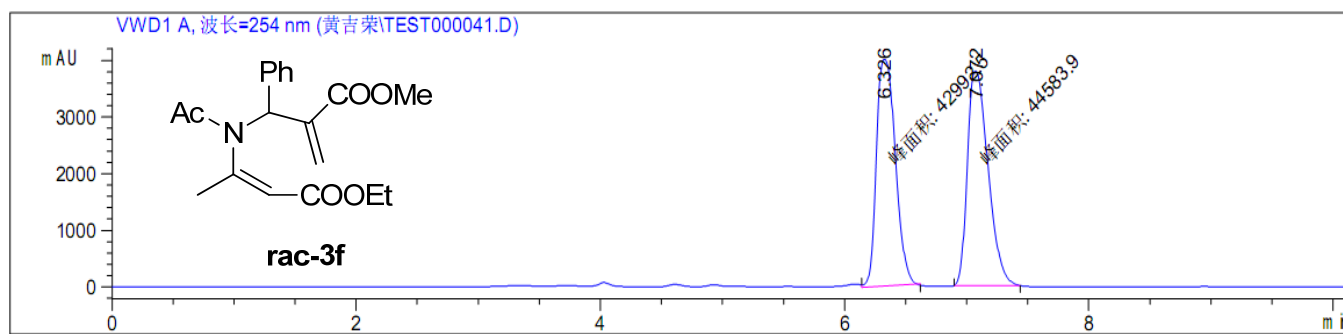

信号 1: VWD1 A, 波长=254 nm

| 峰 # | 保留时间 [min] | 类型 | 峰宽 [min] | 峰面积 mAU *s | 峰高 [mAU]   | 峰面积 %   |
|-----|------------|----|----------|------------|------------|---------|
| 1   | 6.326      | MM | 0.1790   | 4.29925e4  | 4003.25488 | 49.0914 |
| 2   | 7.072      | MM | 0.1959   | 4.45839e4  | 3792.66479 | 50.9086 |

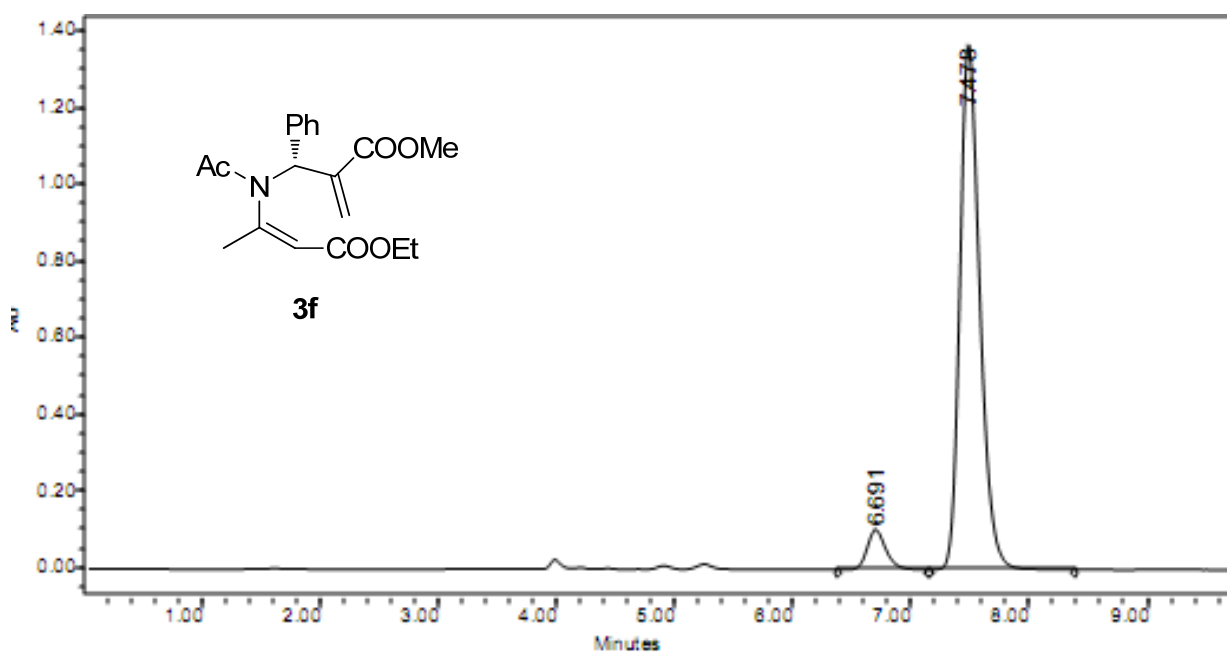

|   | RT (min) | Area (V *sec) | % Area | Height (V) | % Height |
|---|----------|---------------|--------|------------|----------|
| 1 | 6.691    | 1142151       | 6.66   | 103523     | 7.02     |
| 2 | 7.478    | 16014926      | 93.34  | 1370909    | 92.98    |

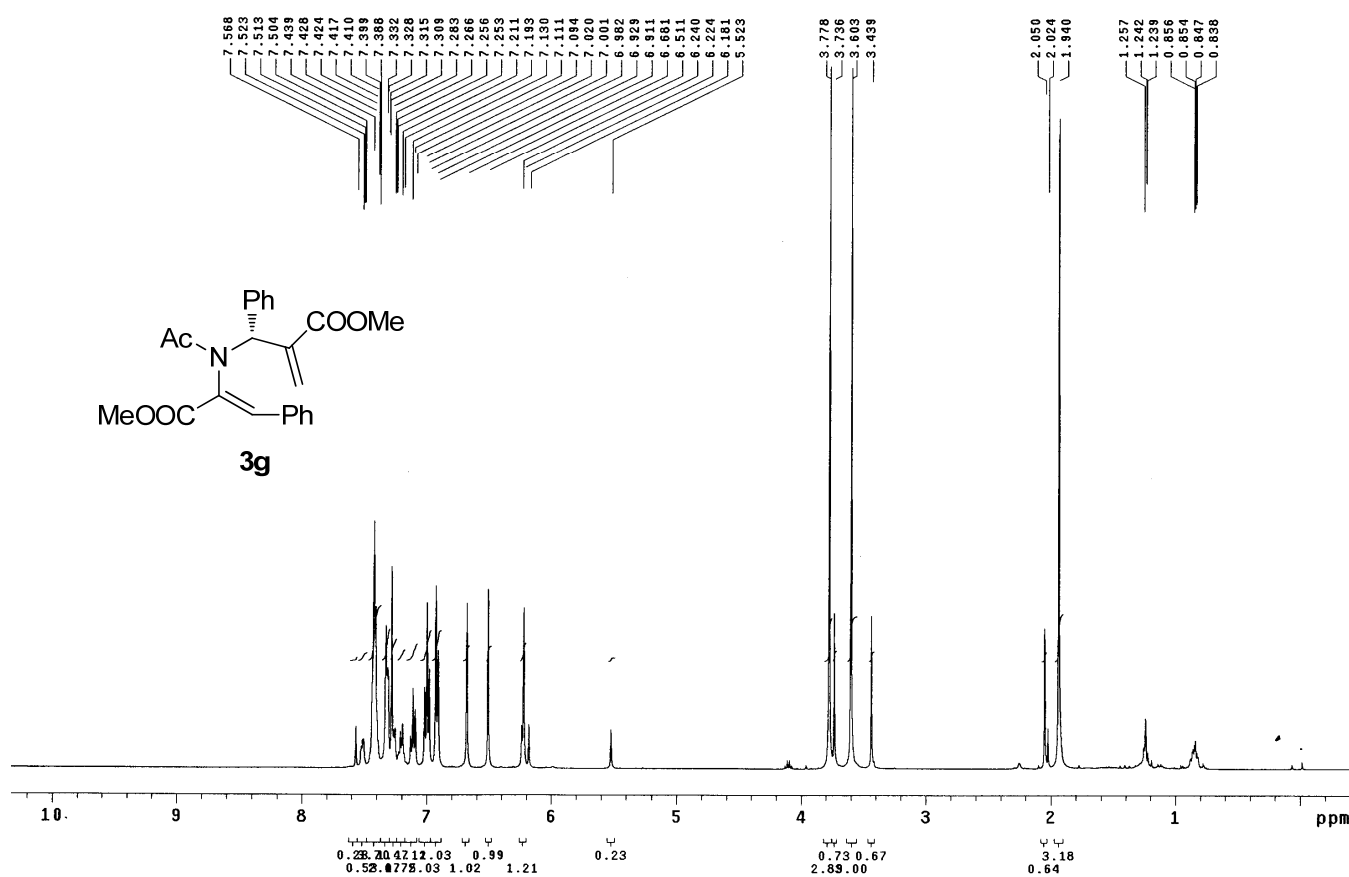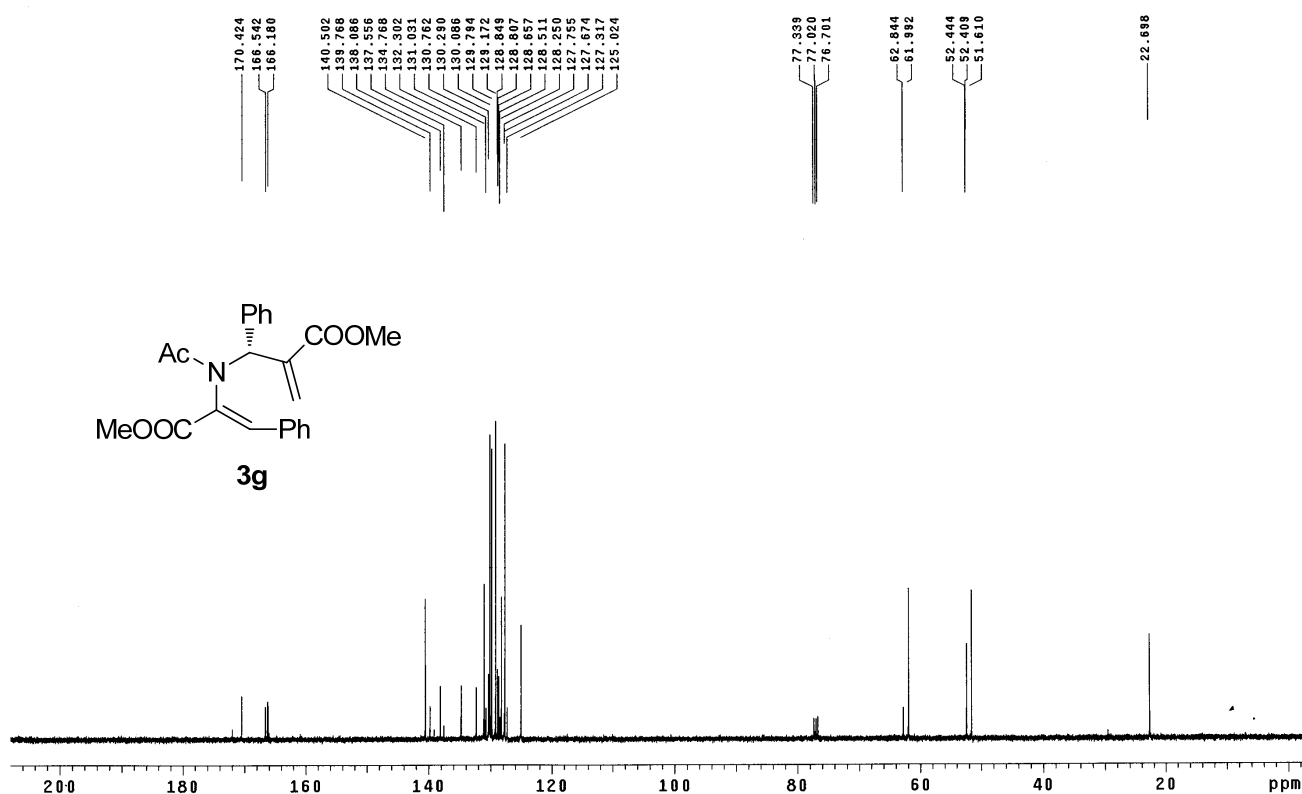

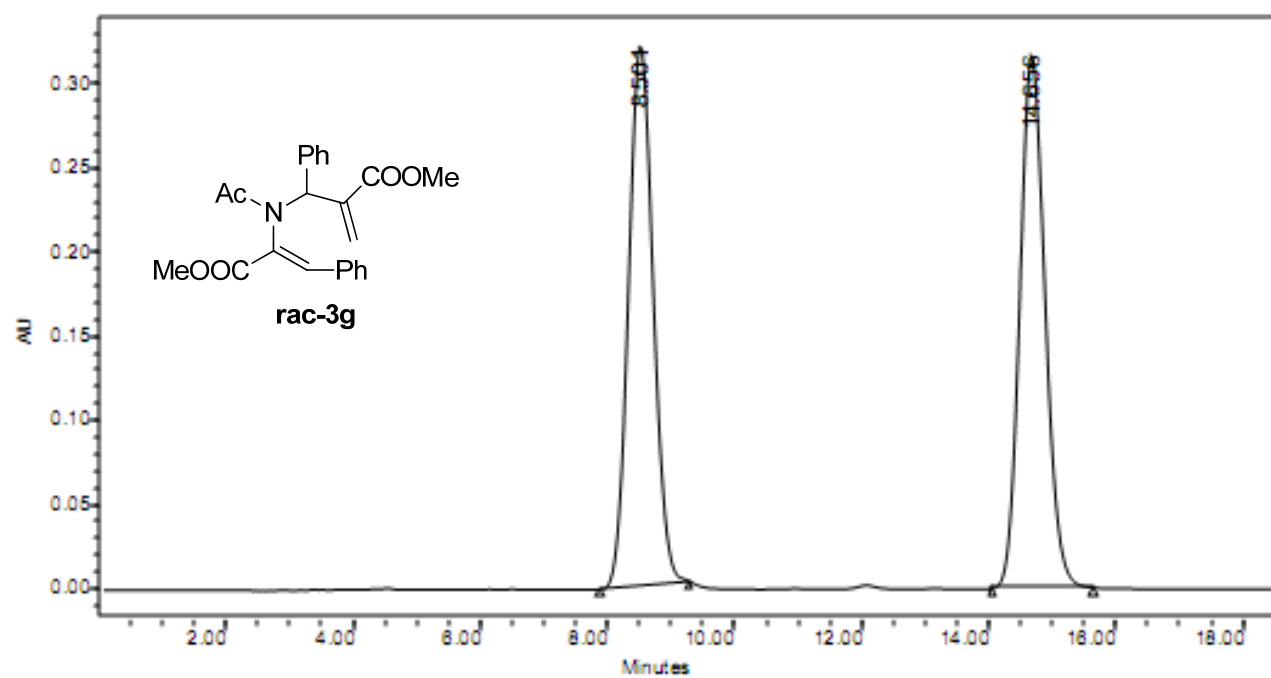

|   | RT<br>(min) | Area<br>(V *sec) | % Area | Height<br>(V) | % Height |
|---|-------------|------------------|--------|---------------|----------|
| 1 | 8.501       | 8633119          | 49.79  | 320316        | 50.30    |
| 2 | 14.656      | 8704258          | 50.21  | 316467        | 49.70    |

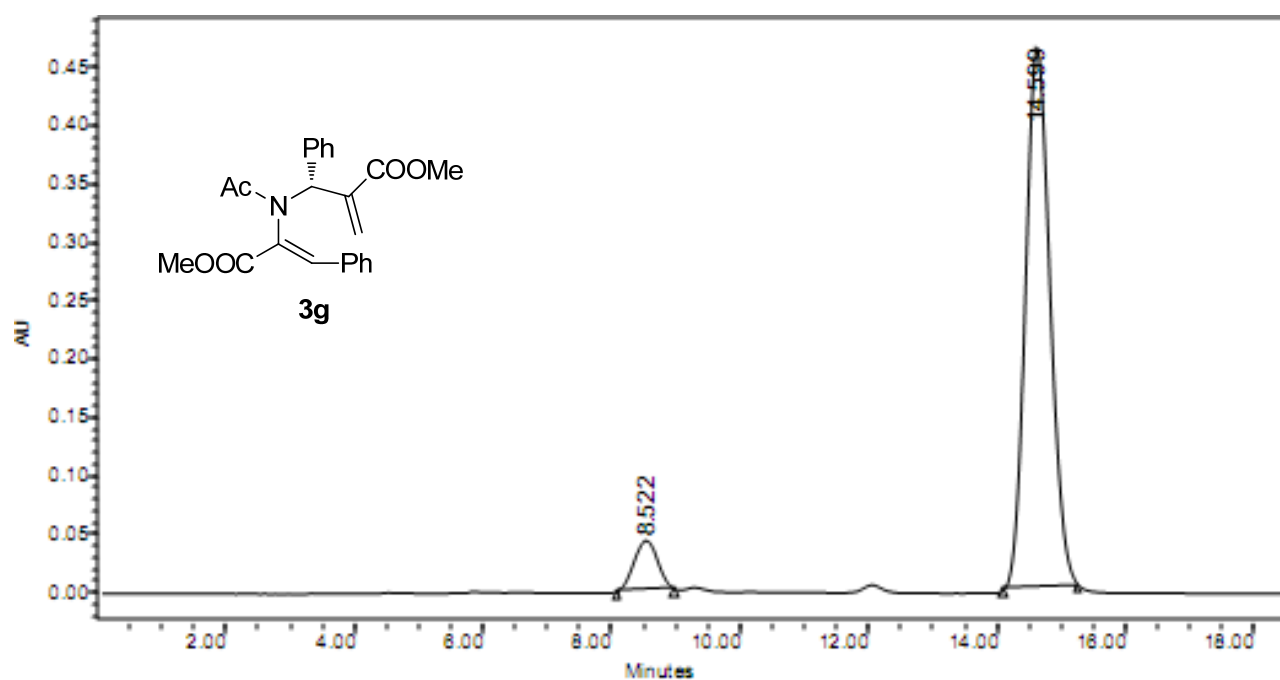

|   | RT<br>(min) | Area<br>(V *sec) | % Area | Height<br>(V) | % Height |
|---|-------------|------------------|--------|---------------|----------|
| 1 | 8.522       | 1075953          | 8.07   | 42074         | 8.34     |
| 2 | 14.599      | 12249129         | 91.93  | 462649        | 91.66    |

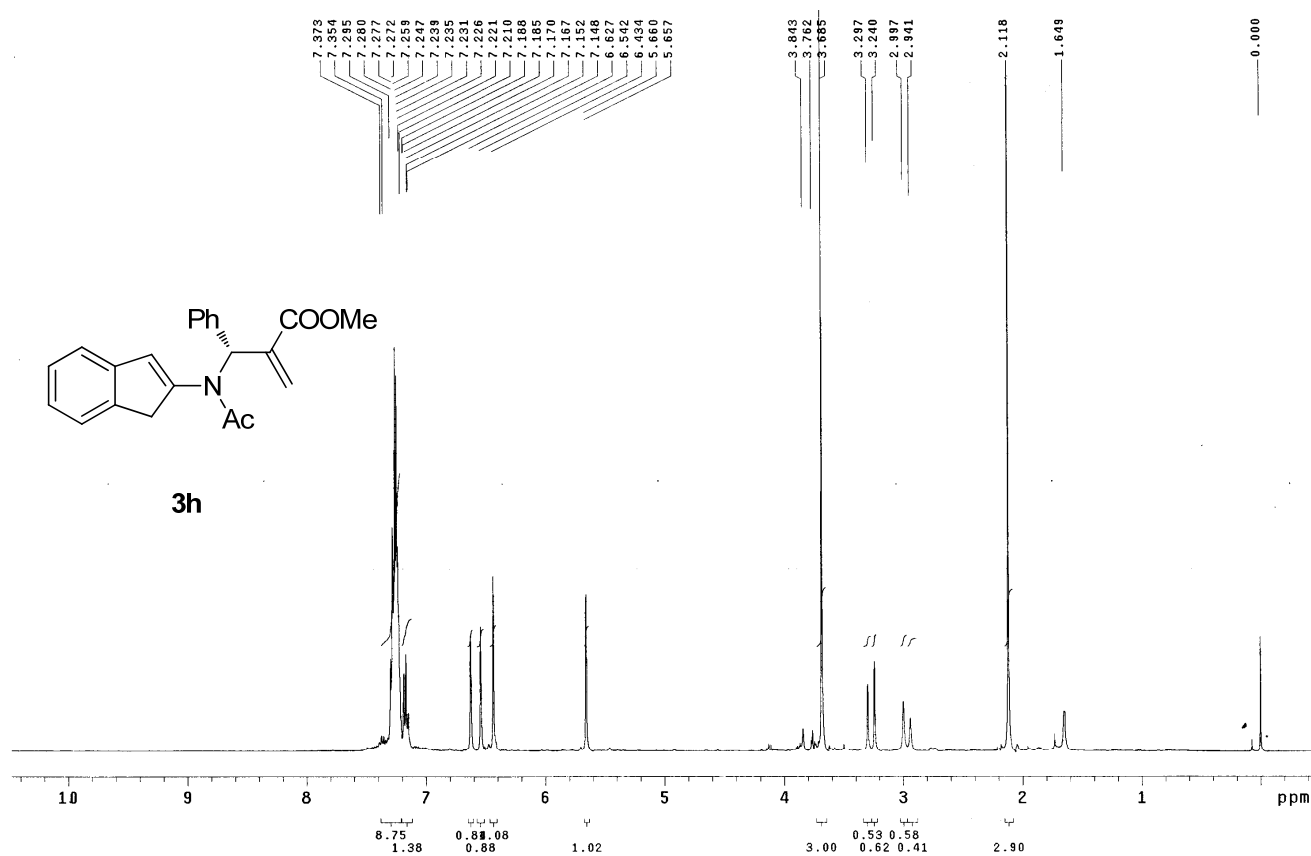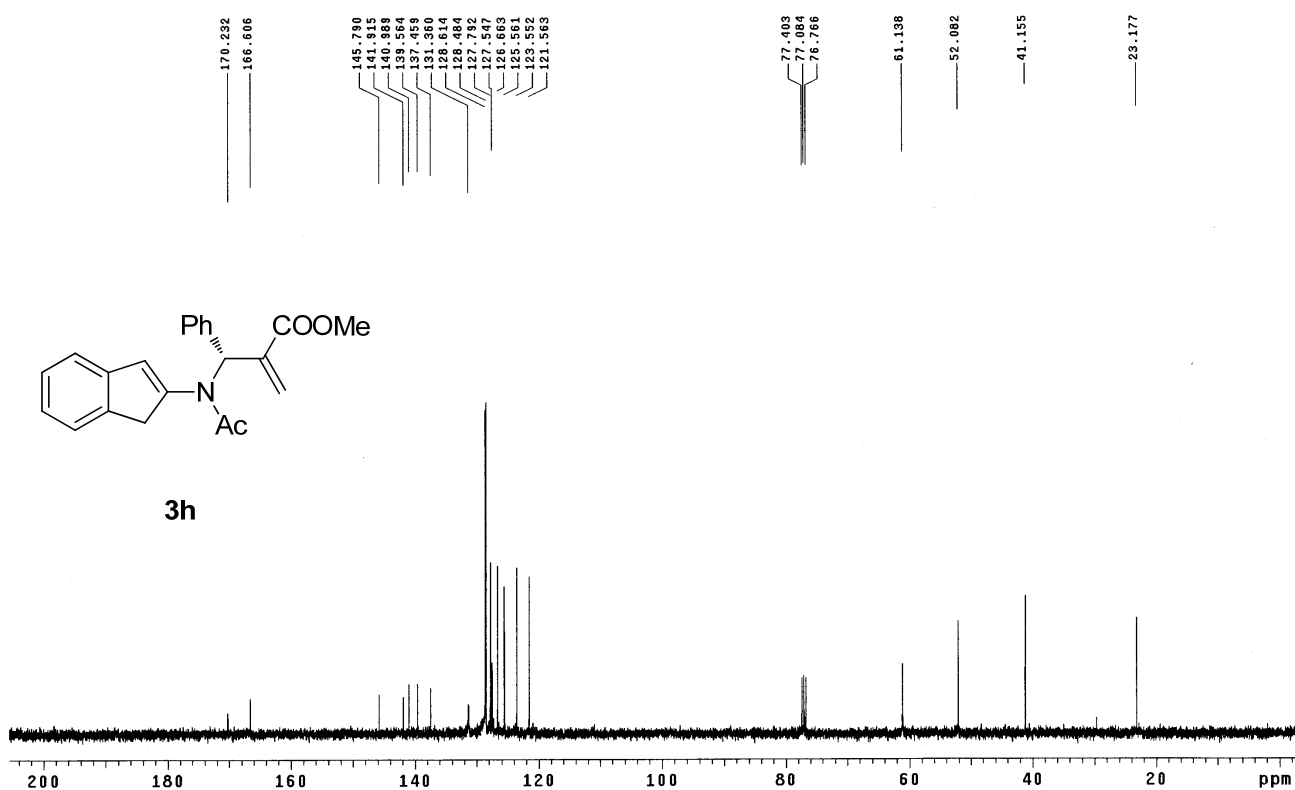

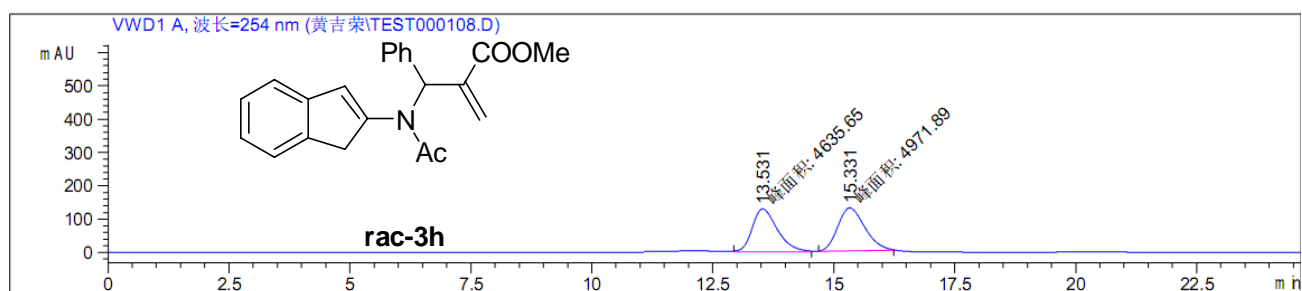

信号 1: VWD1 A, 波长=254 nm

| 峰 # | 保留时间 [min] | 类型 | 峰宽 [min] | 峰面积 mAU *s | 峰高 [mAU]  | 峰面积 %   |
|-----|------------|----|----------|------------|-----------|---------|
| 1   | 13.531     | MM | 0.6010   | 4635.65332 | 128.55125 | 48.2501 |
| 2   | 15.331     | MM | 0.6472   | 4971.89307 | 128.04141 | 51.7499 |

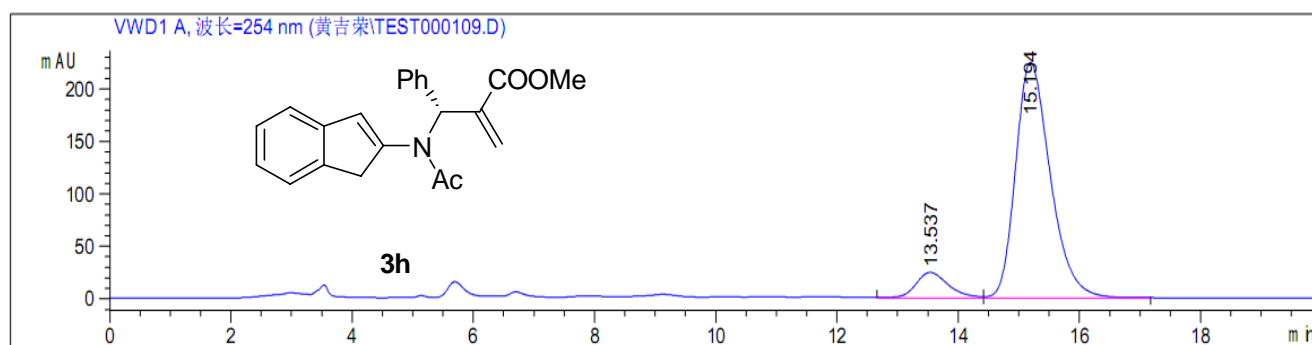

信号 1: VWD1 A, 波长=254 nm

| 峰 # | 保留时间 [min] | 类型 | 峰宽 [min] | 峰面积 mAU *s | 峰高 [mAU]  | 峰面积 %   |
|-----|------------|----|----------|------------|-----------|---------|
| 1   | 13.537     | VV | 0.5669   | 900.13379  | 24.25486  | 9.1715  |
| 2   | 15.194     | VB | 0.6117   | 8914.34375 | 224.51759 | 90.8285 |



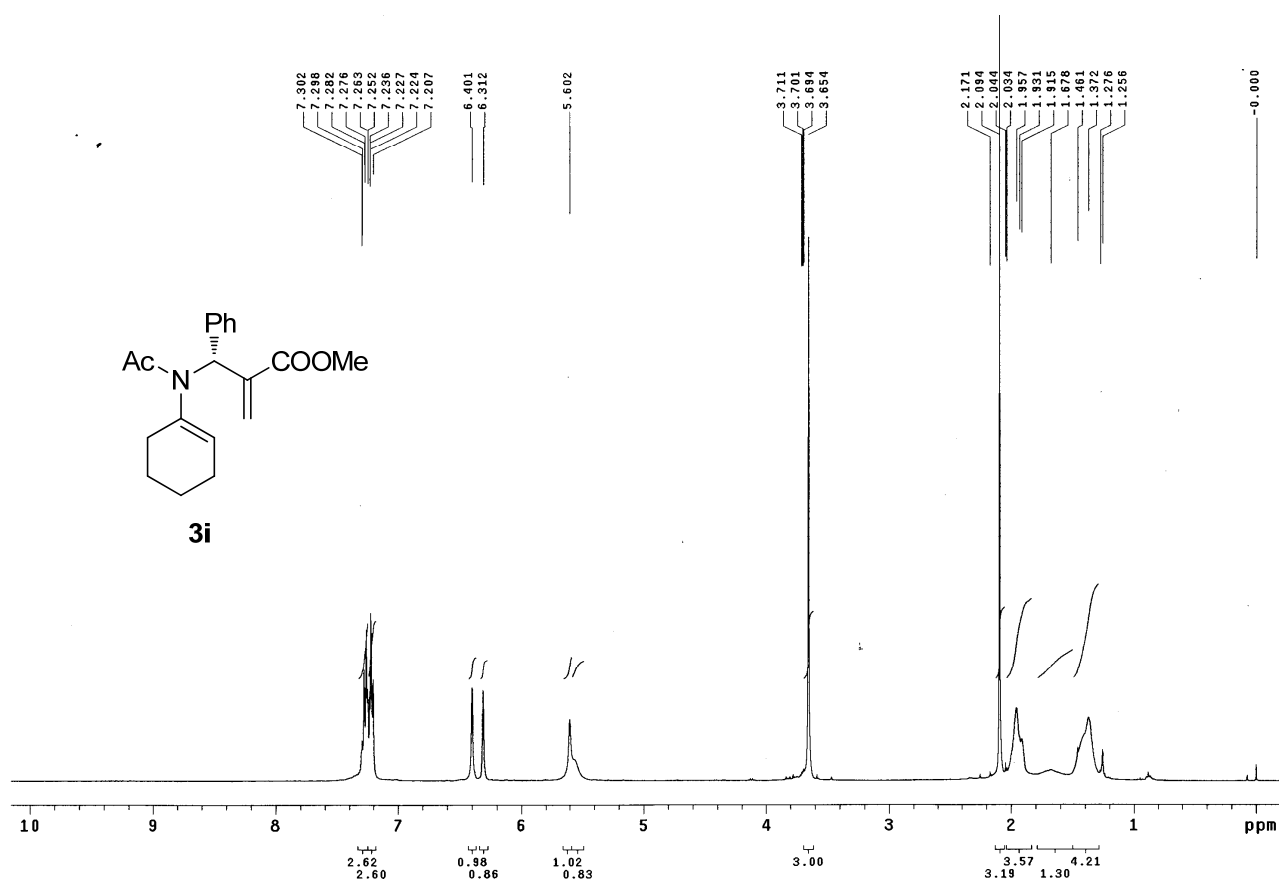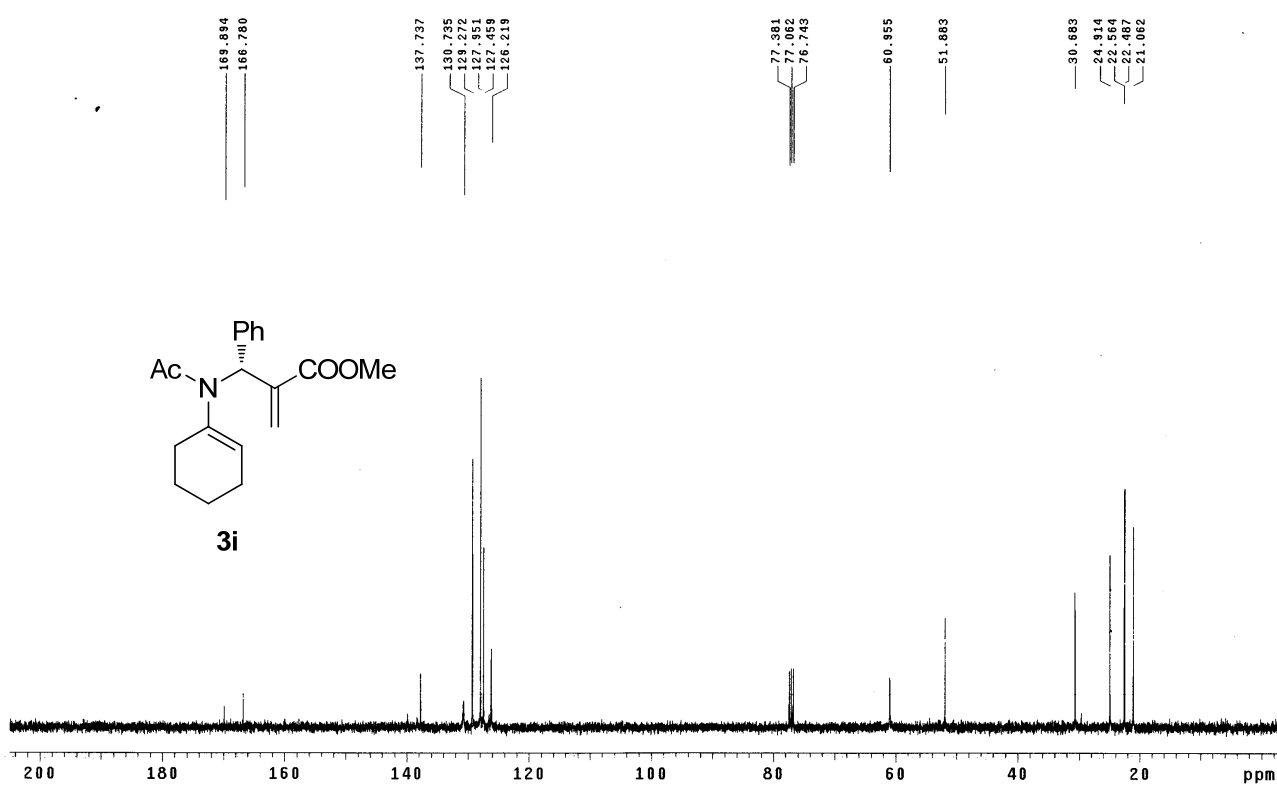

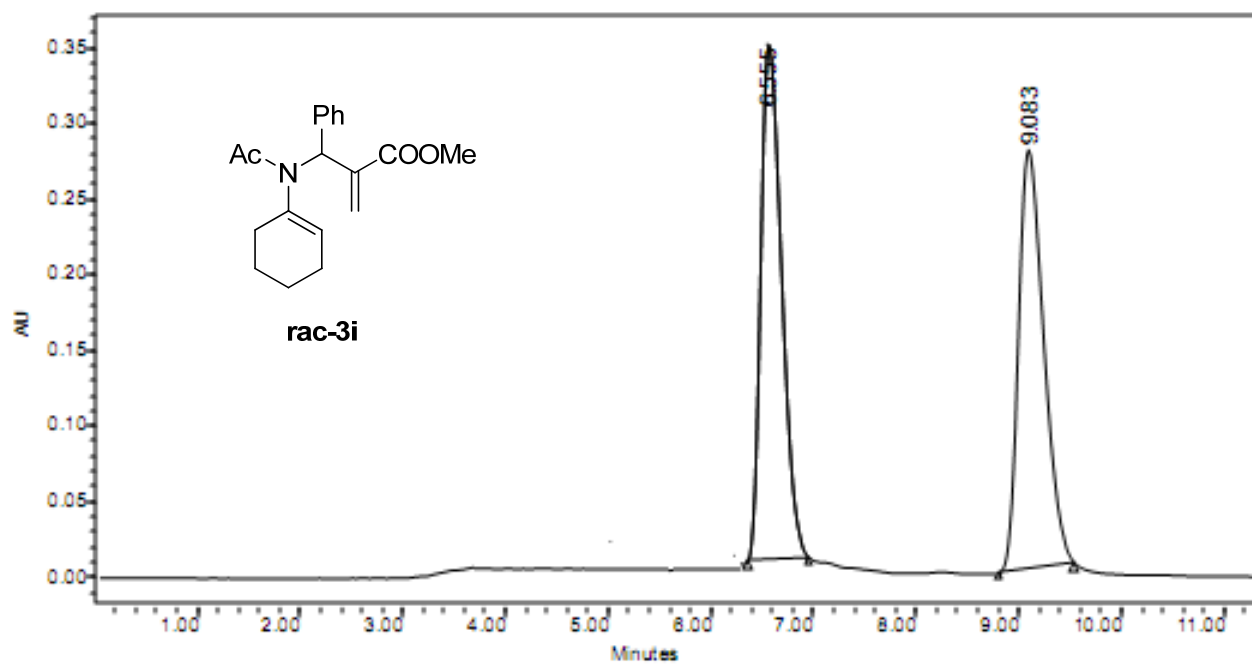

|   | RT<br>(min) | Area<br>( V*sec) | % Area | Height<br>( V ) | %<br>Height |
|---|-------------|------------------|--------|-----------------|-------------|
| 1 | 6.555       | 4802605          | 50.39  | 341544          | 55.22       |
| 2 | 9.083       | 4727620          | 49.61  | 276922          | 44.78       |

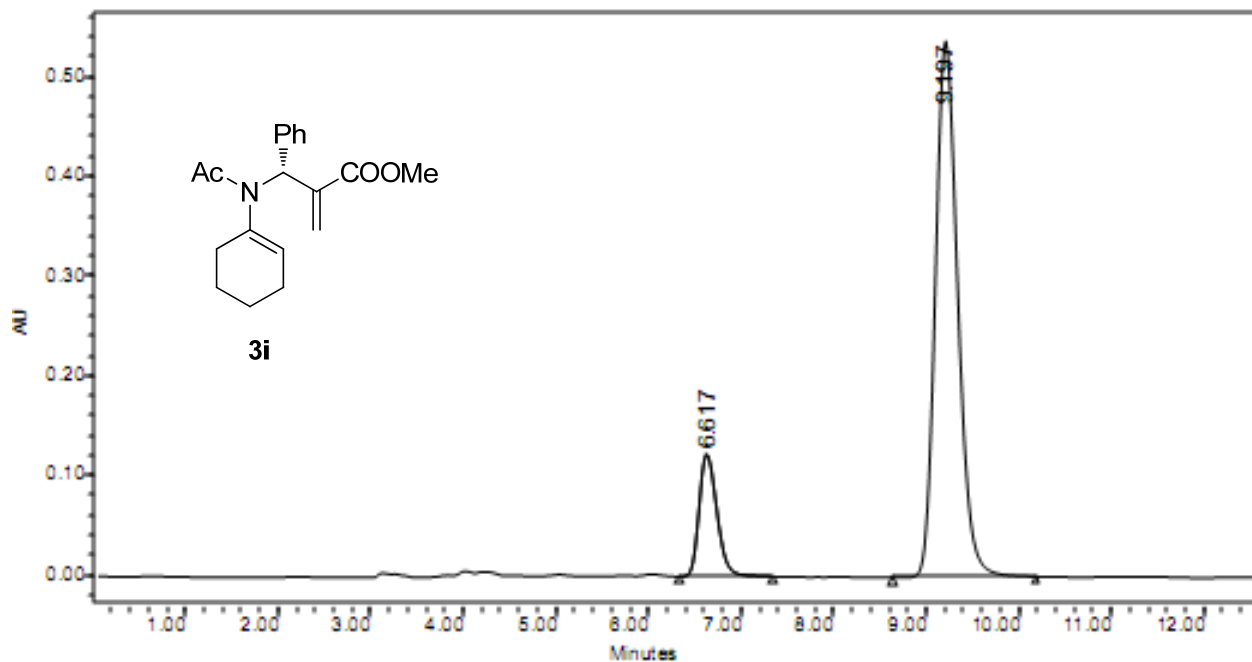

|   | RT<br>(min) | Area<br>( V*sec) | % Area | Height<br>( V ) | %<br>Height |
|---|-------------|------------------|--------|-----------------|-------------|
| 1 | 6.617       | 1655113          | 15.48  | 122617          | 18.57       |
| 2 | 9.197       | 9034446          | 84.52  | 537663          | 81.43       |

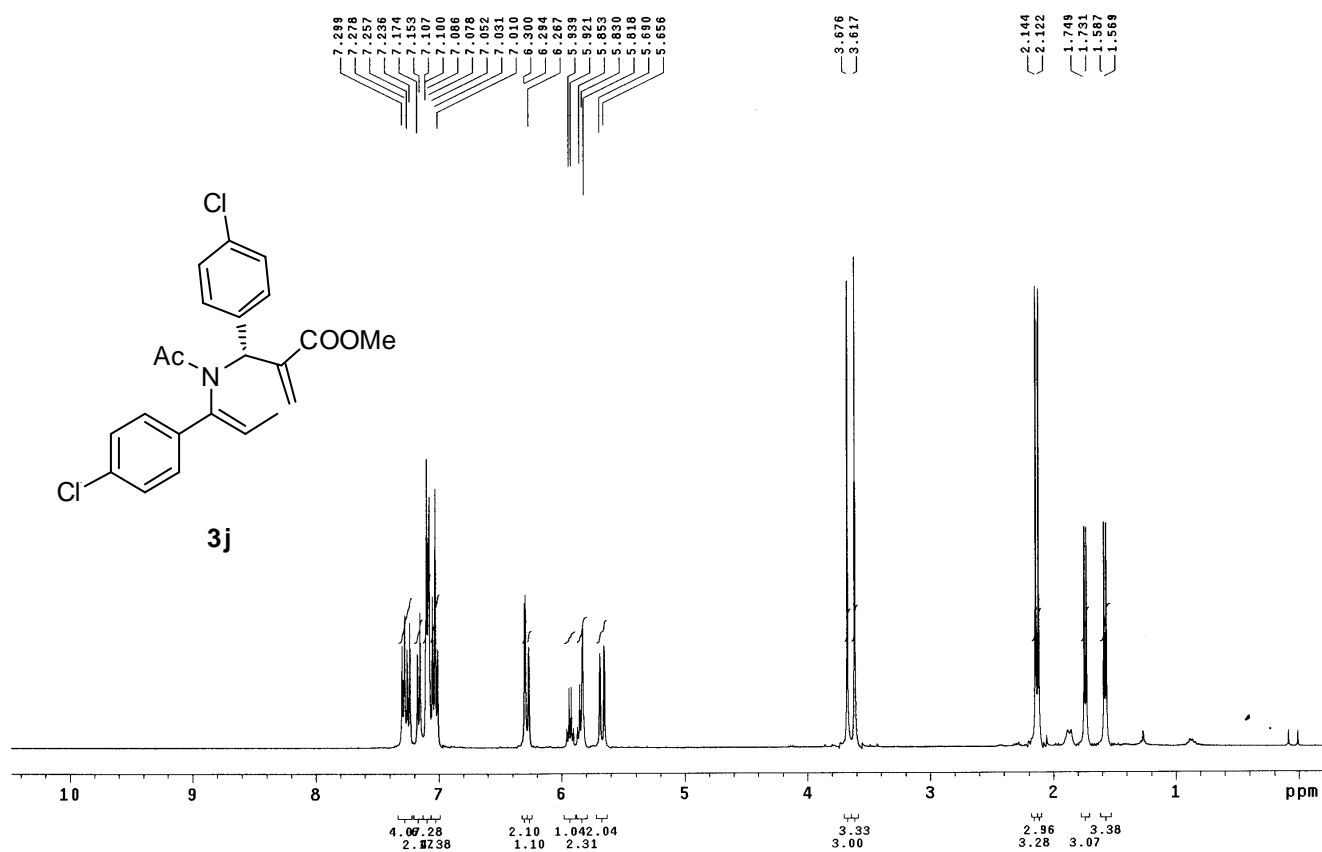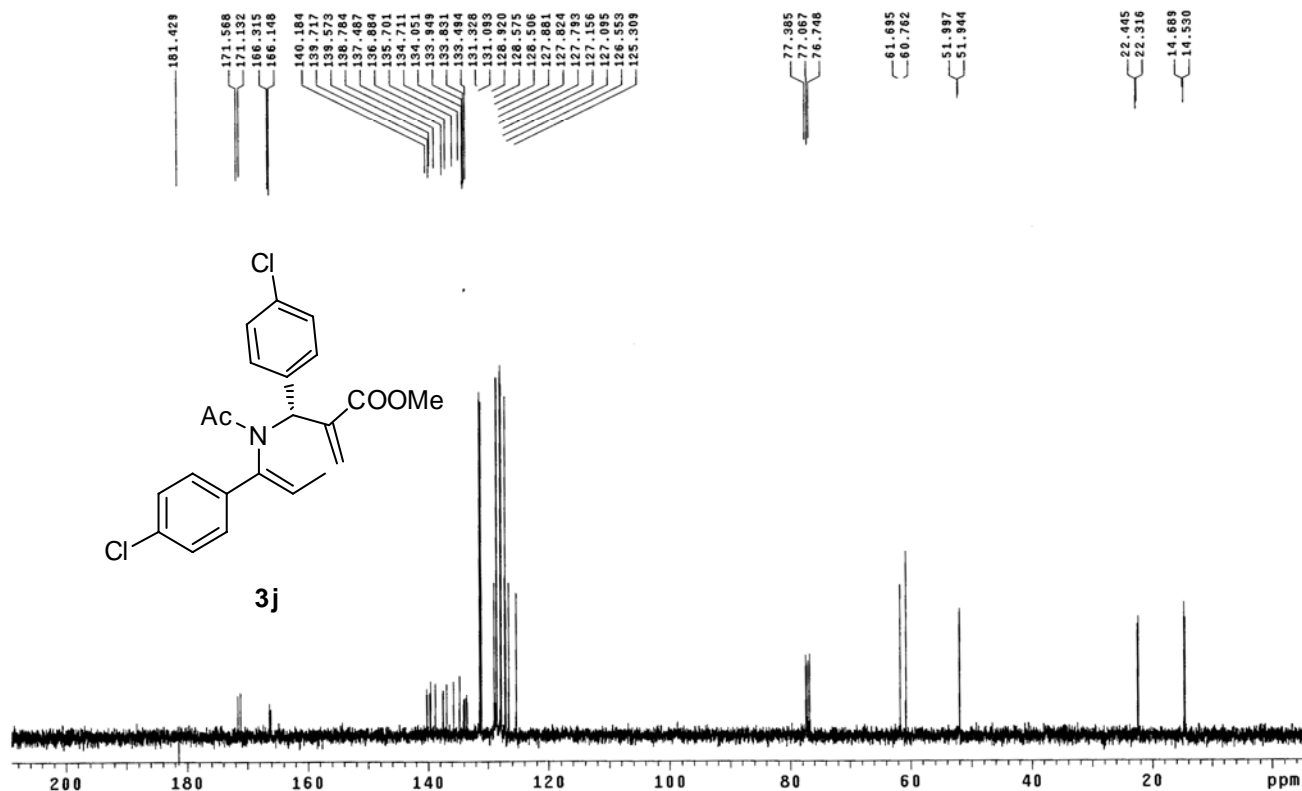

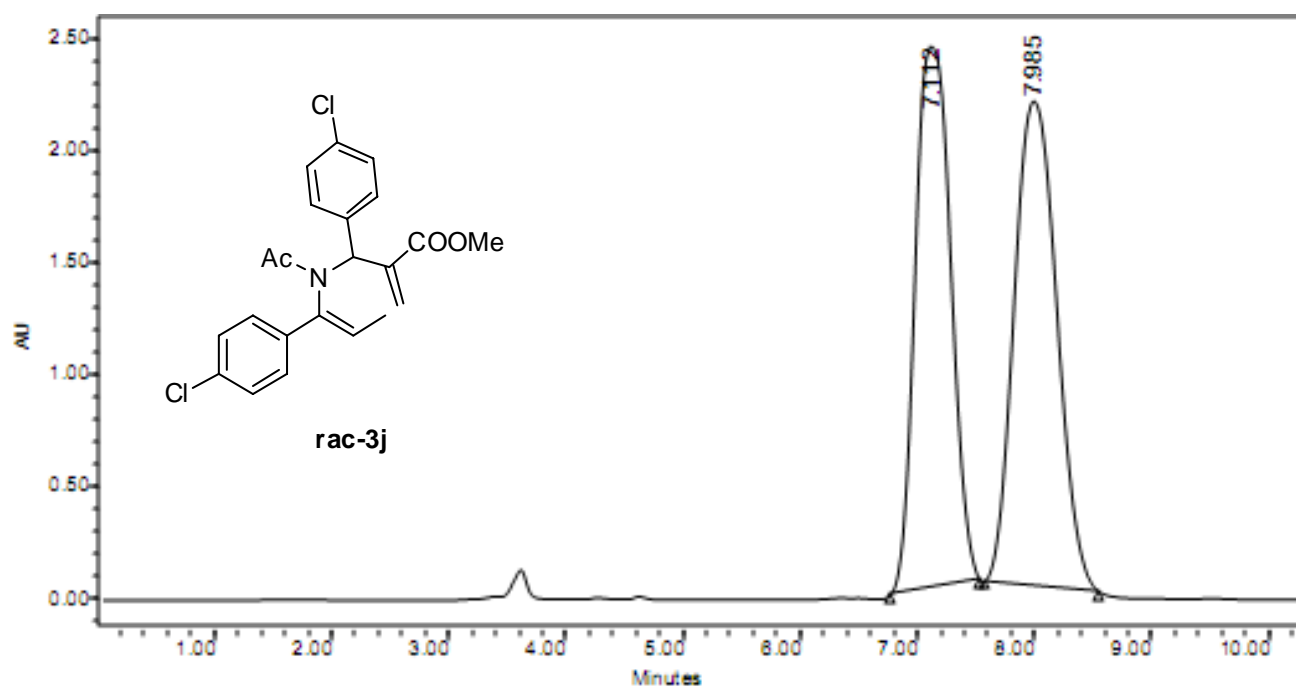

|   | RT<br>(min) | Area<br>( V *sec) | % Area | Height<br>( V ) | %<br>Height |
|---|-------------|-------------------|--------|-----------------|-------------|
| 1 | 7.112       | 51050880          | 48.37  | 2414677         | 52.77       |
| 2 | 7.985       | 54500552          | 51.63  | 2160927         | 47.23       |

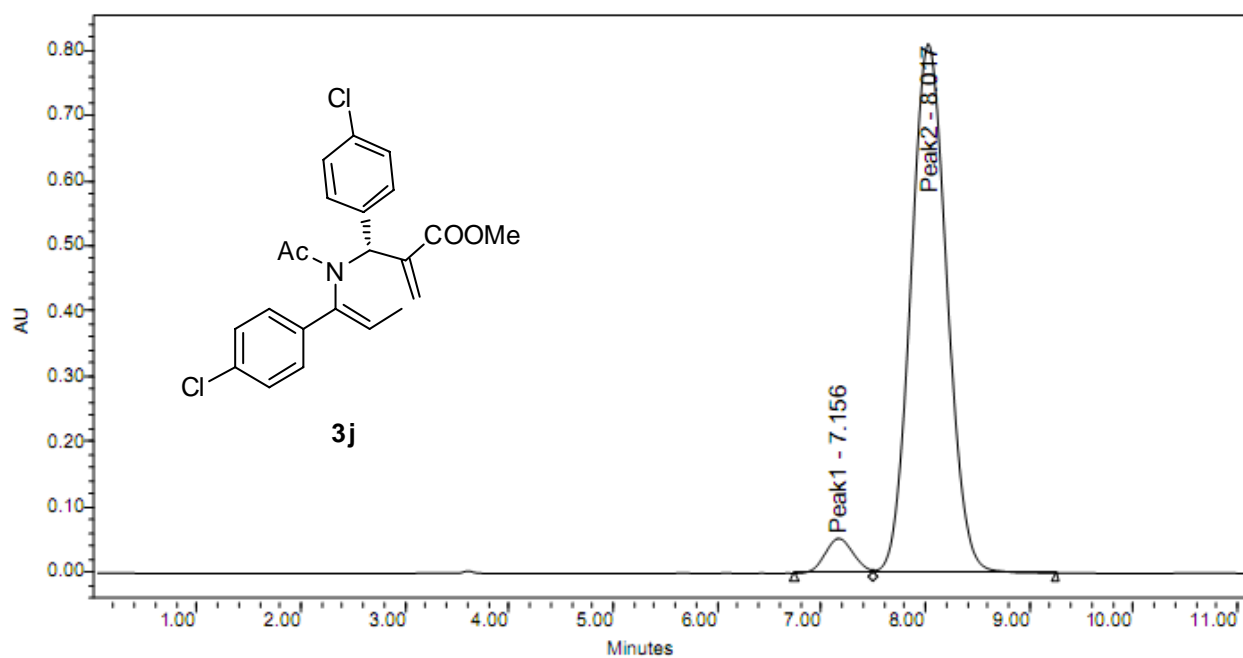

|   | Peak Name | RT (min) | Area ( V *sec) | % Area | Height ( V ) | % Height |
|---|-----------|----------|----------------|--------|--------------|----------|
| 1 | Peak1     | 7.156    | 1023754        | 4.97   | 53230        | 6.15     |
| 2 | Peak2     | 8.017    | 19582068       | 95.03  | 811648       | 93.85    |

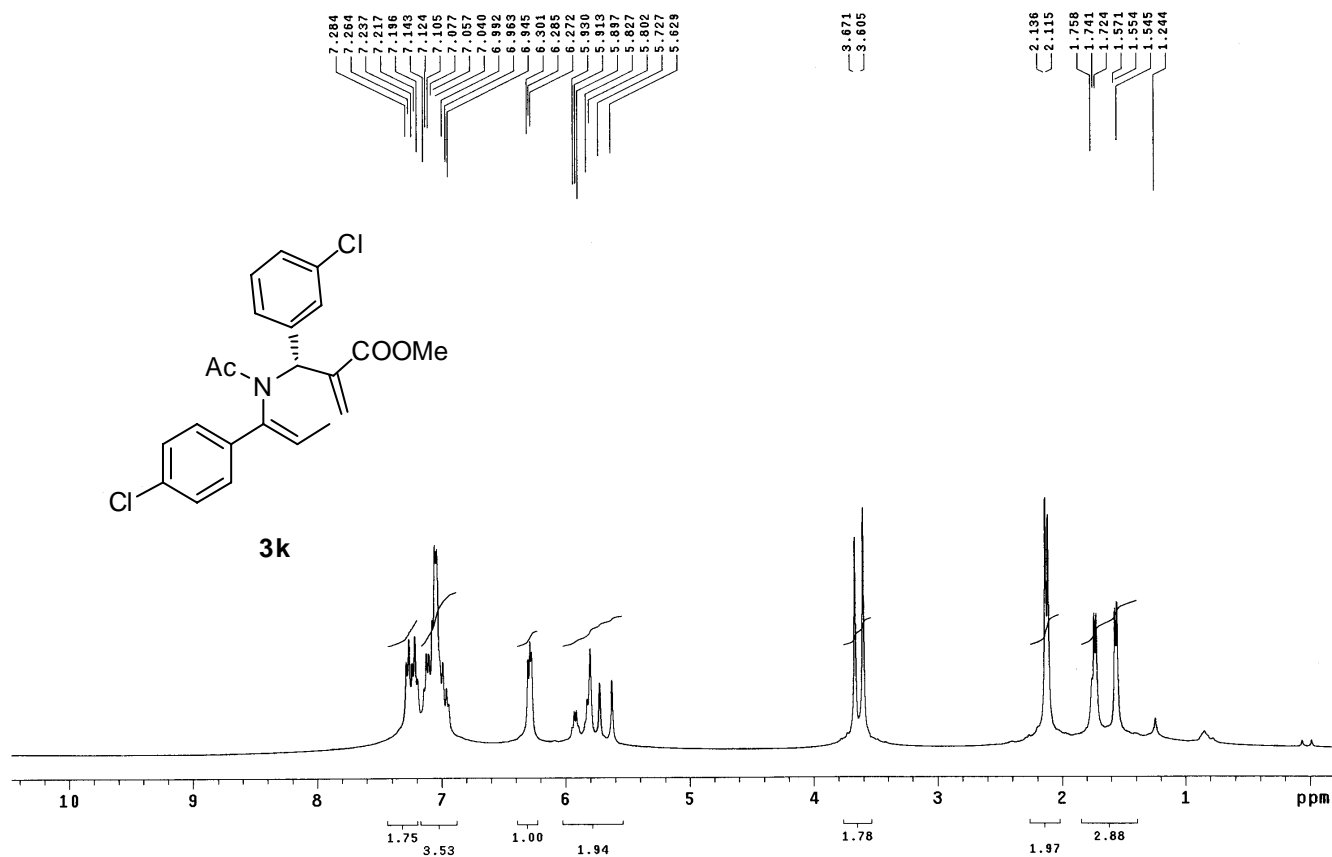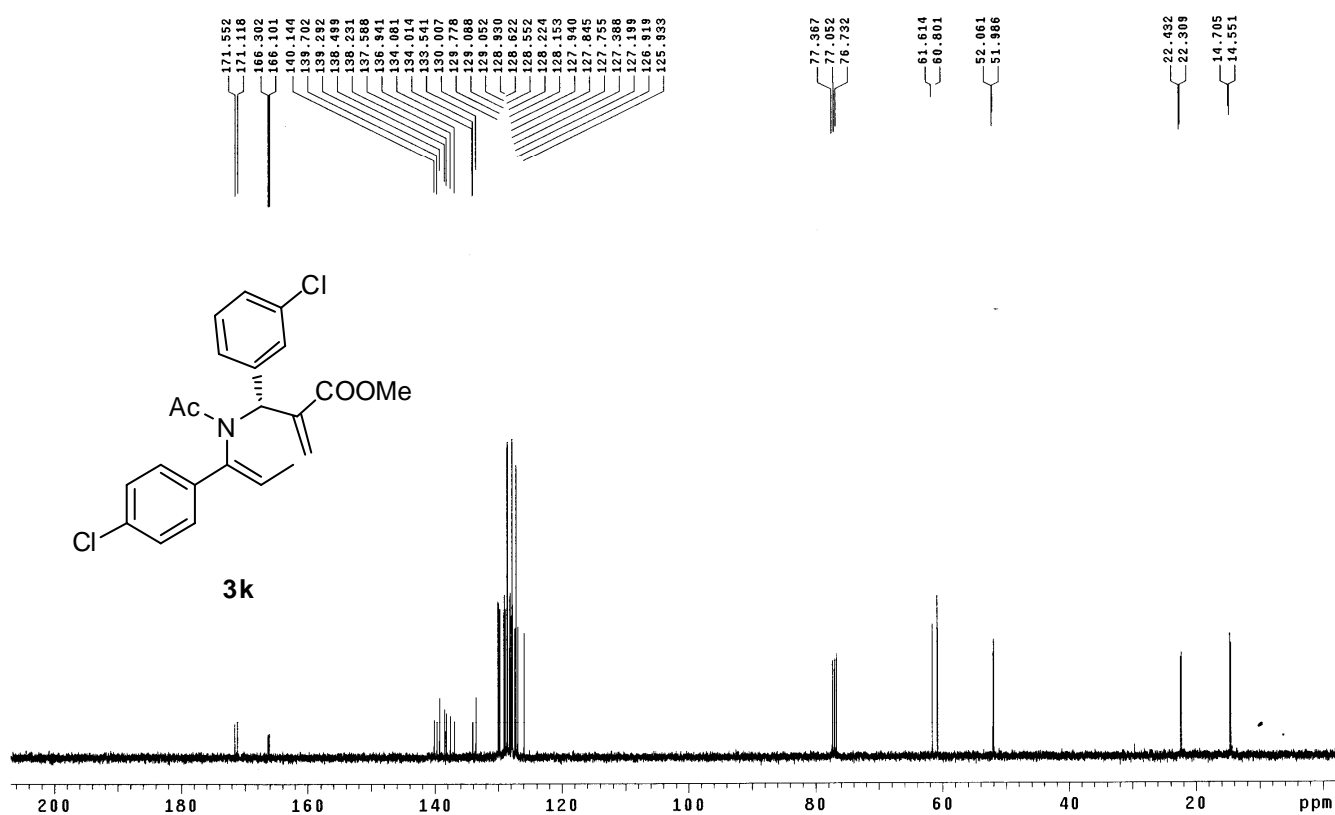

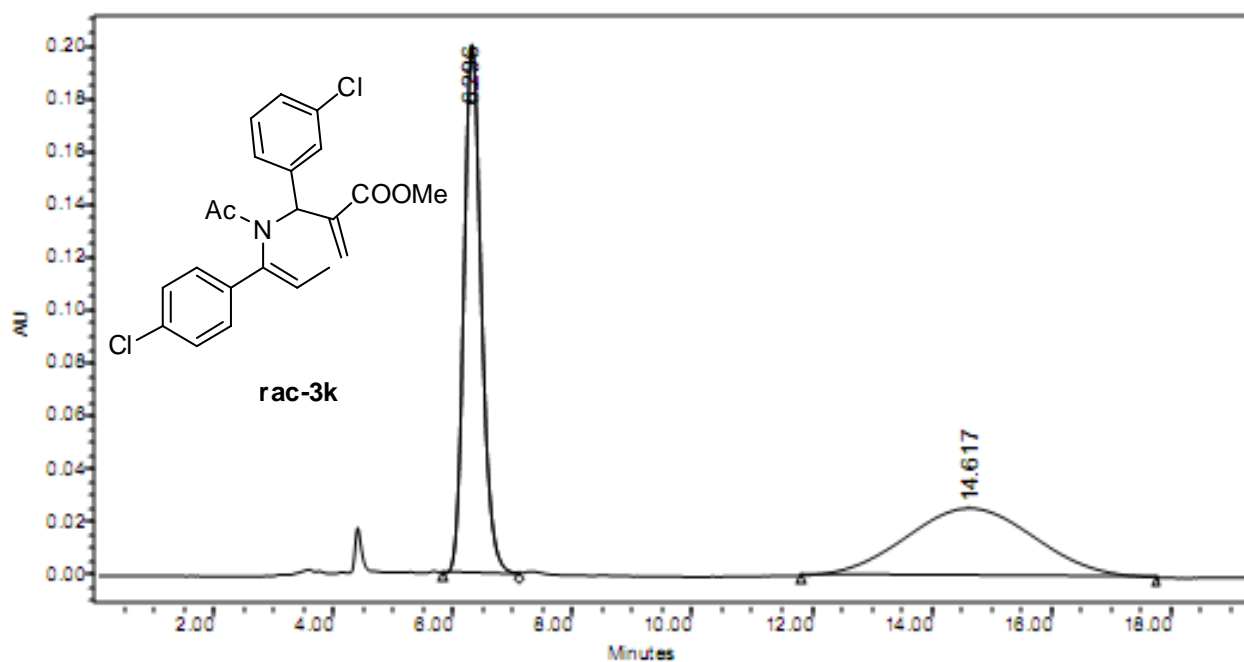

|   | RT (min) | Area (V*sec) | % Area | Height (V) | % Height |
|---|----------|--------------|--------|------------|----------|
| 1 | 6.296    | 4070711      | 51.11  | 200240     | 88.58    |
| 2 | 14.617   | 3893221      | 48.89  | 25815      | 11.42    |

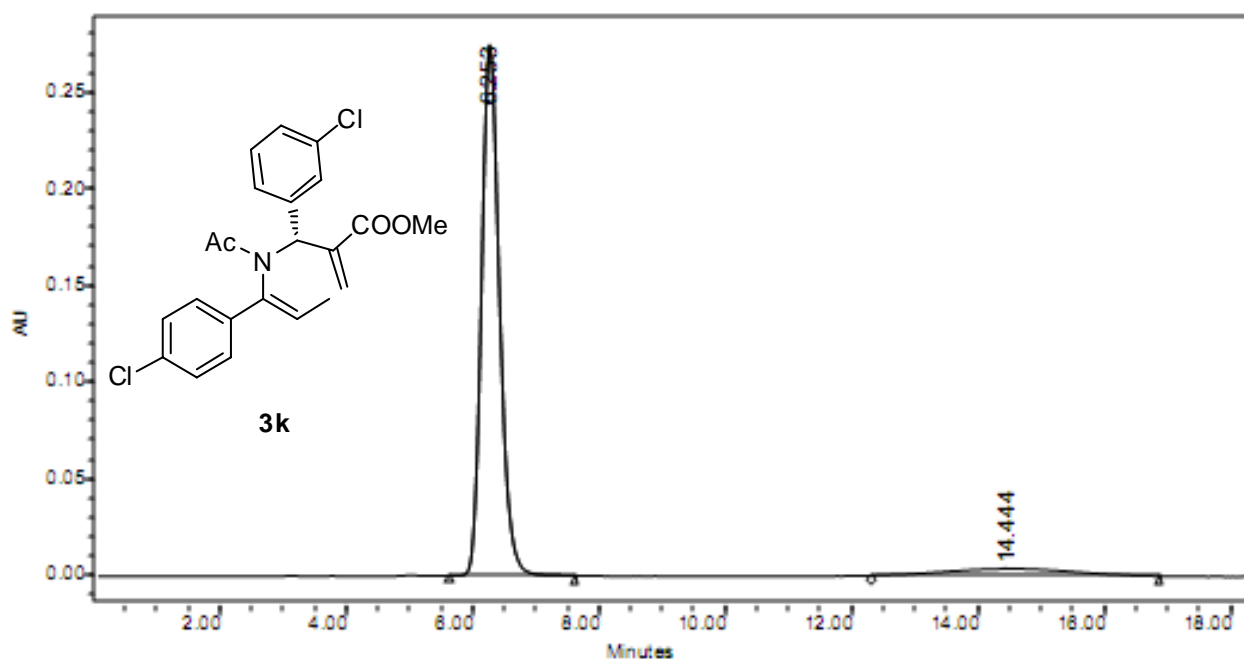

|   | RT (min) | Area (V*sec) | % Area | Height (V) | % Height |
|---|----------|--------------|--------|------------|----------|
| 1 | 6.253    | 5438191      | 90.77  | 274673     | 98.63    |
| 2 | 14.444   | 552836       | 9.23   | 3824       | 1.37     |

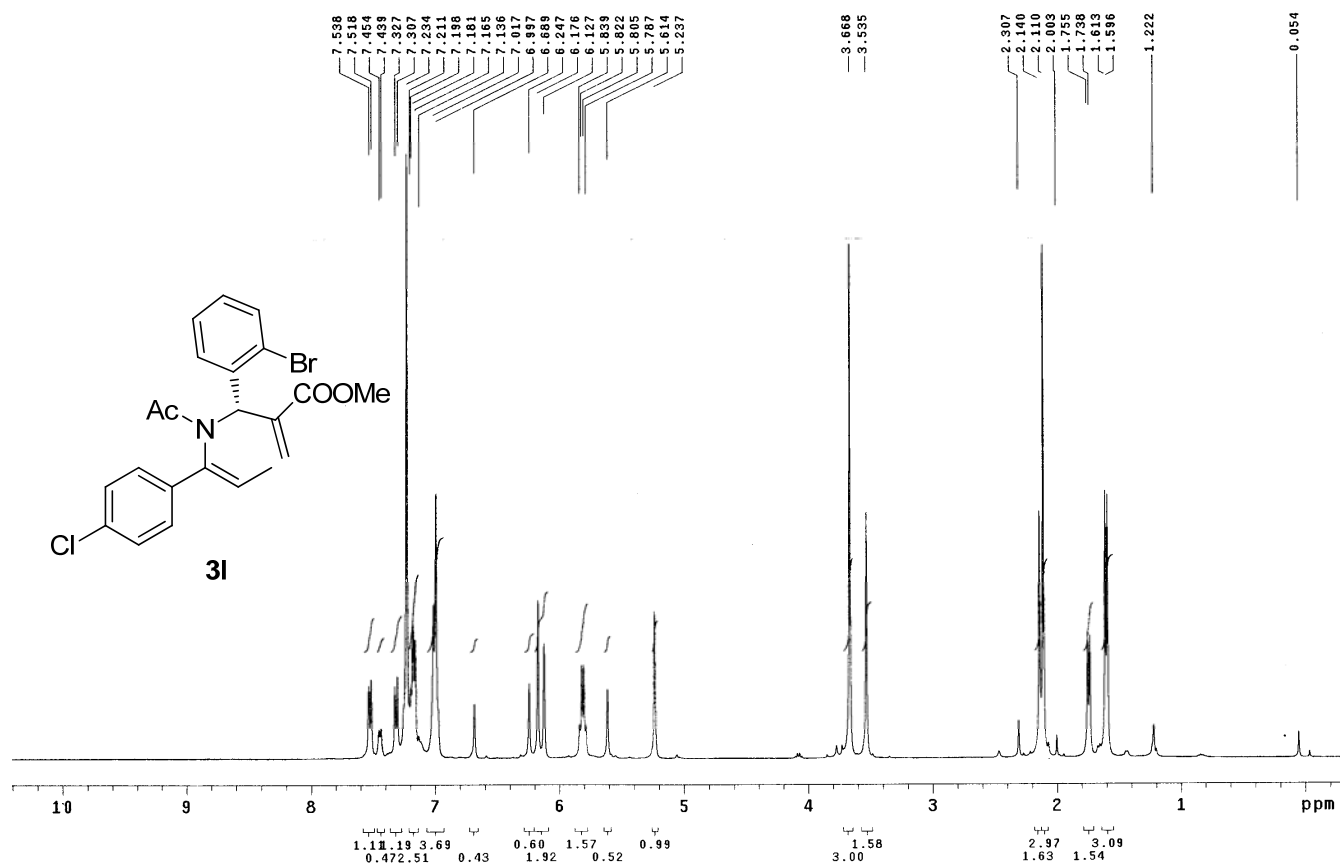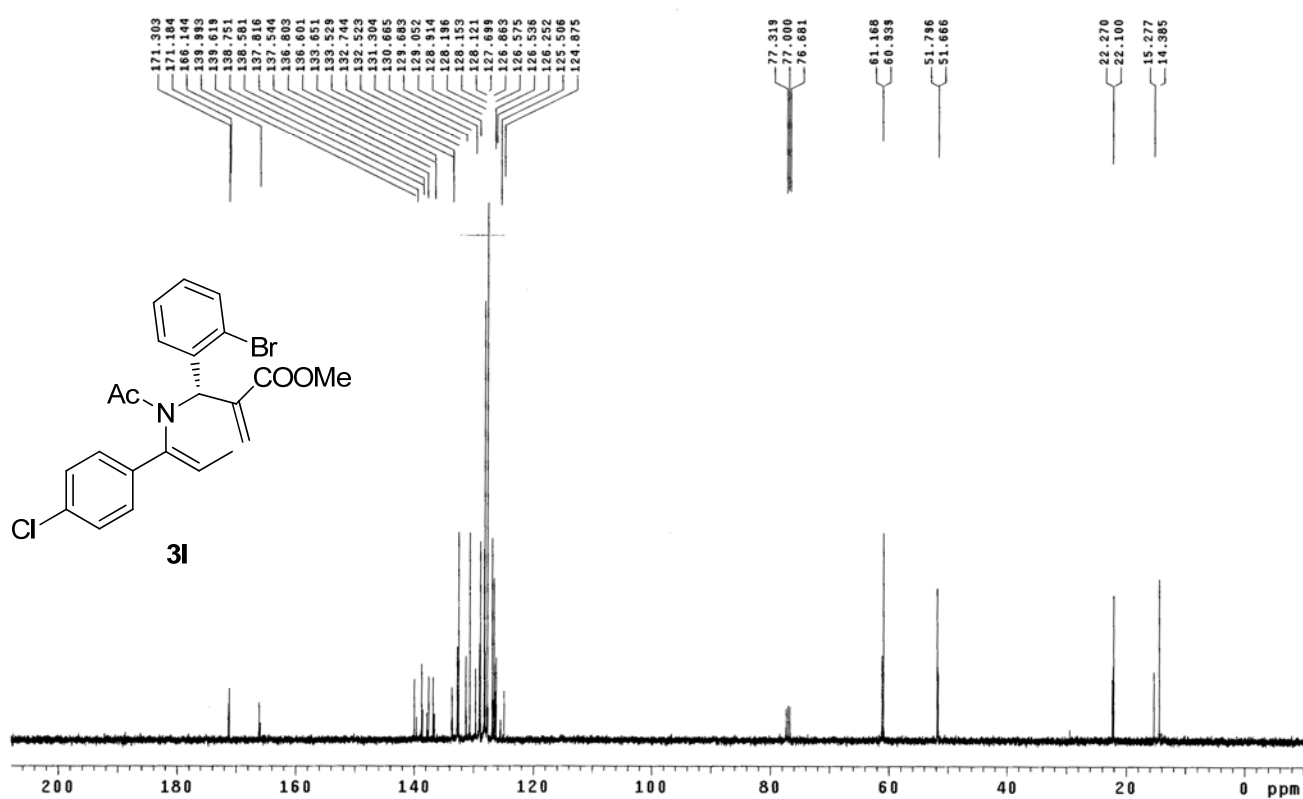

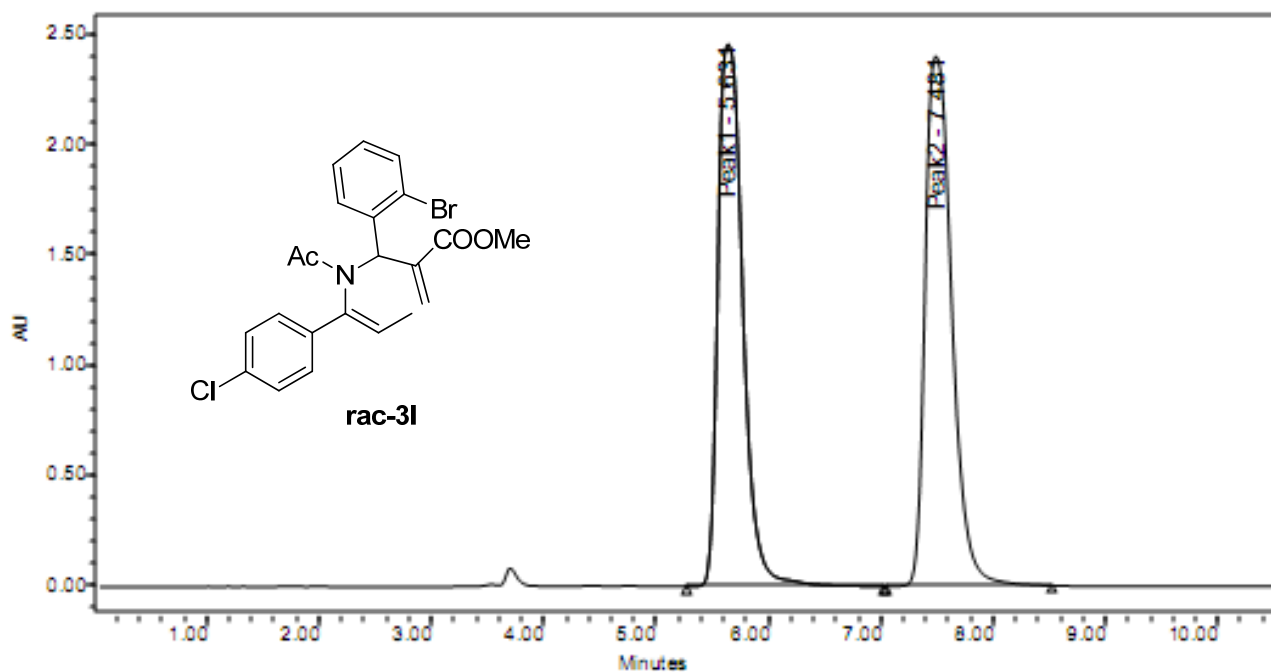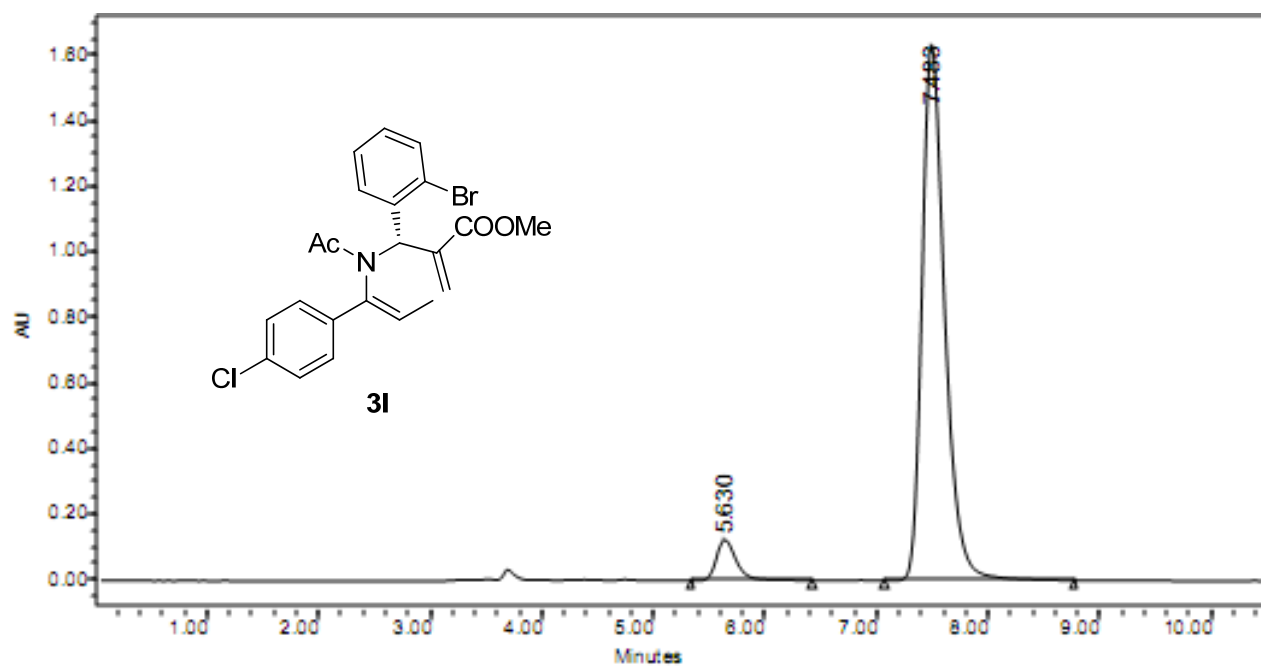



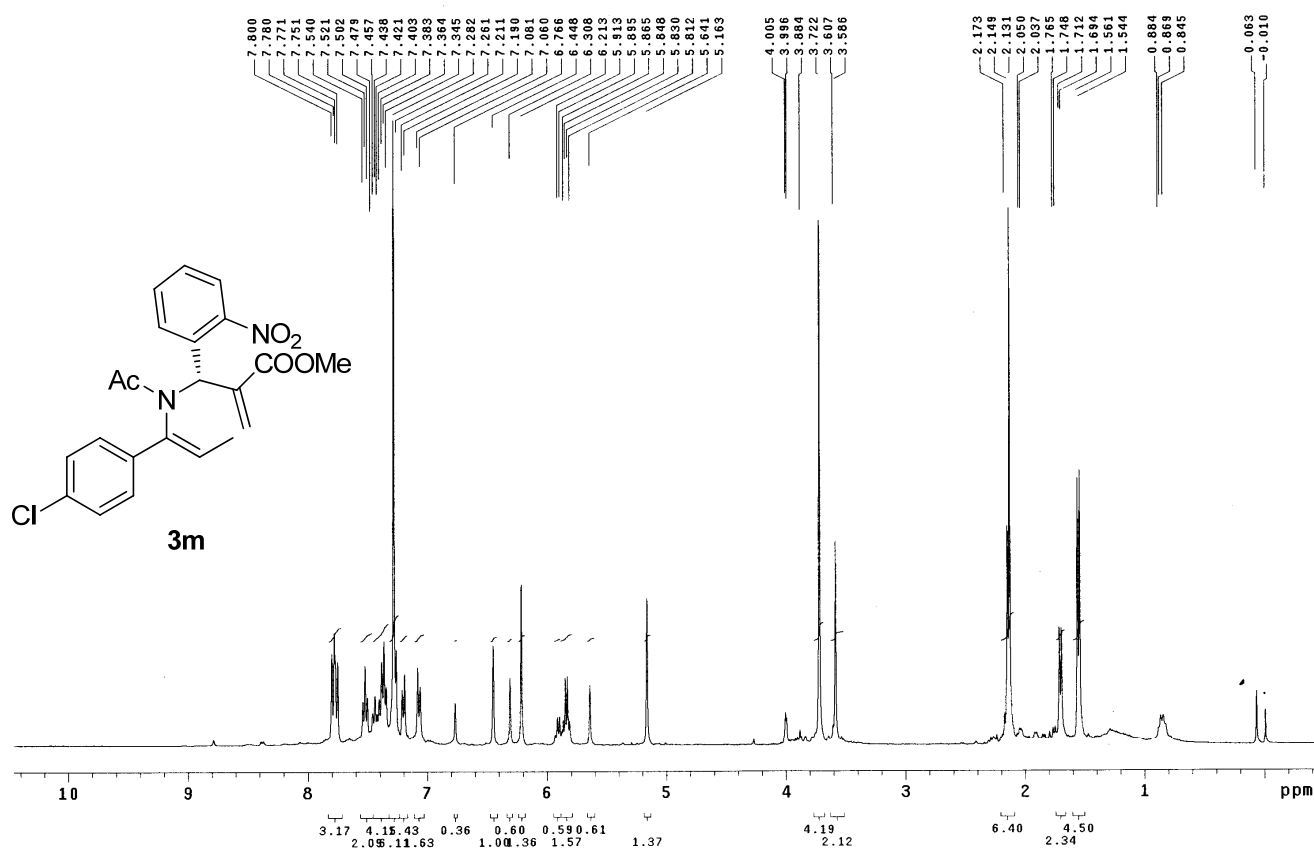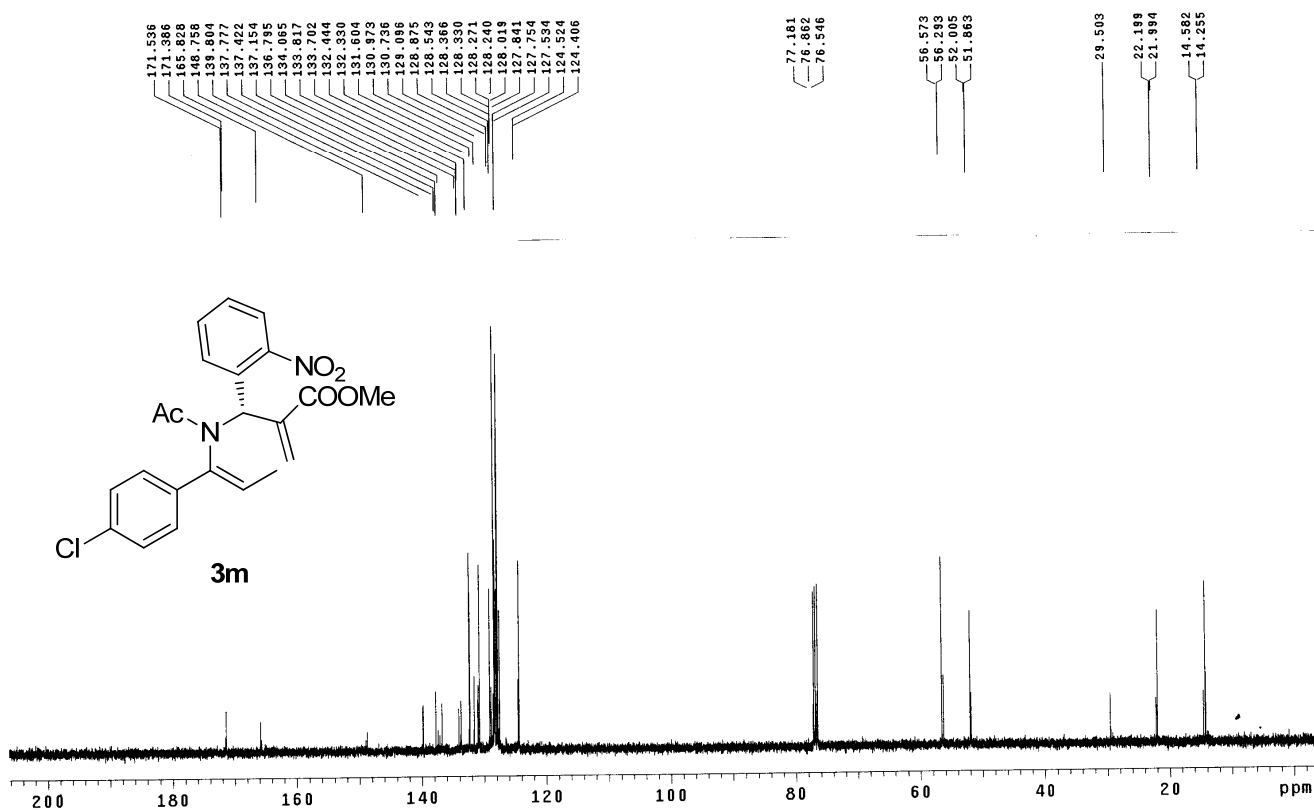

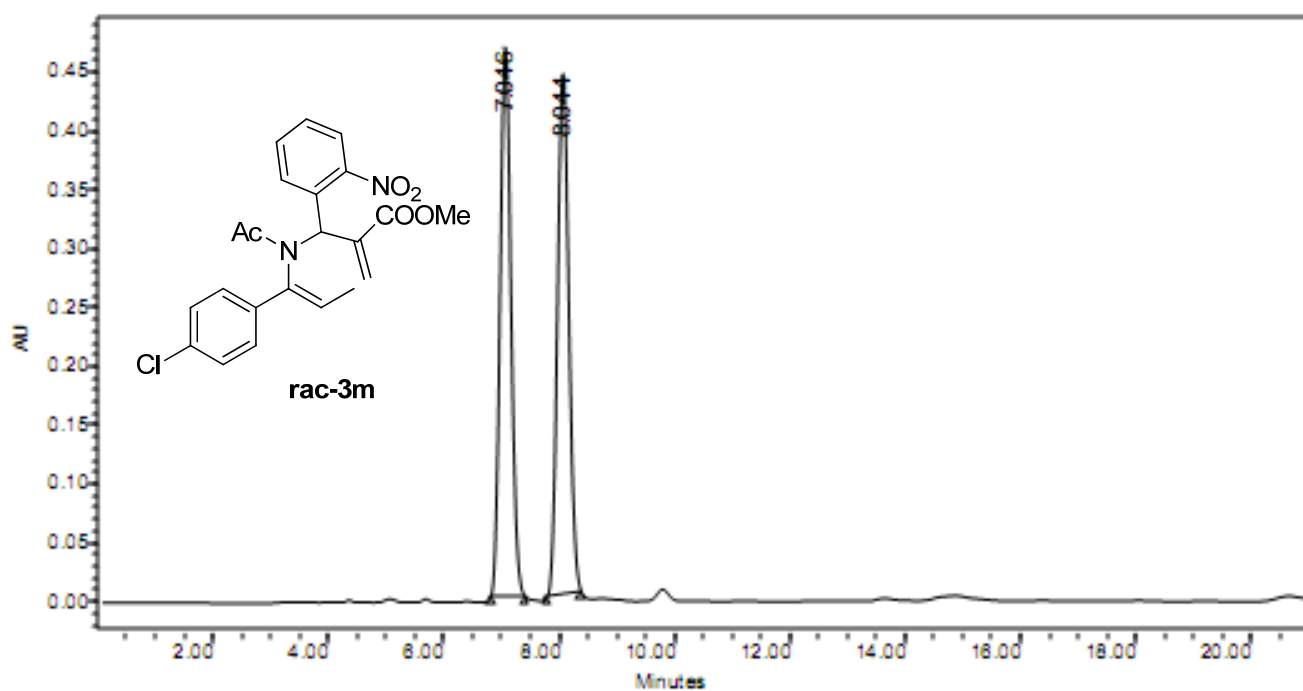

|   | RT<br>(min) | Area<br>(V*sec) | % Area | Height<br>(V) | % Height |
|---|-------------|-----------------|--------|---------------|----------|
| 1 | 7.046       | 6081811         | 50.23  | 467639        | 51.33    |
| 2 | 8.044       | 6026445         | 49.77  | 443369        | 48.67    |

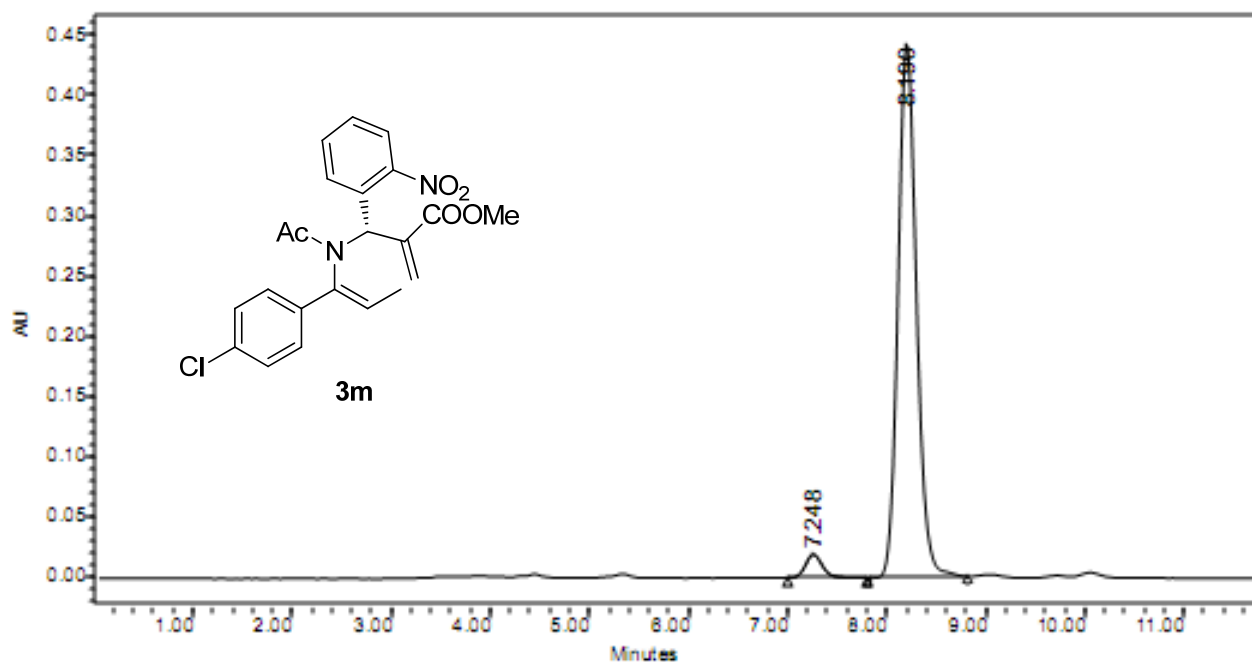

|   | RT<br>(min) | Area<br>(V*sec) | % Area | Height<br>(V) | % Height |
|---|-------------|-----------------|--------|---------------|----------|
| 1 | 7.248       | 236824          | 3.97   | 19567         | 4.22     |
| 2 | 8.190       | 5735814         | 96.03  | 443935        | 95.78    |

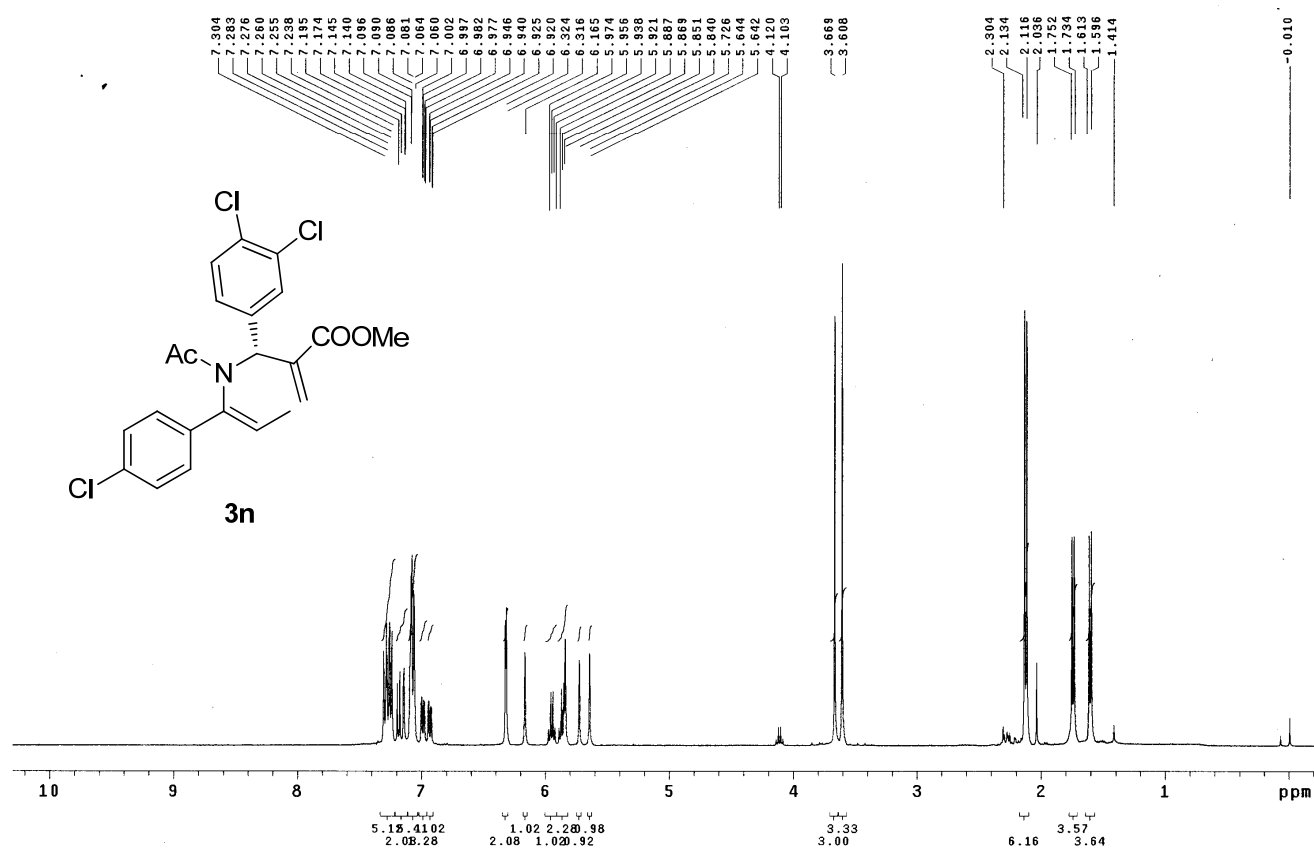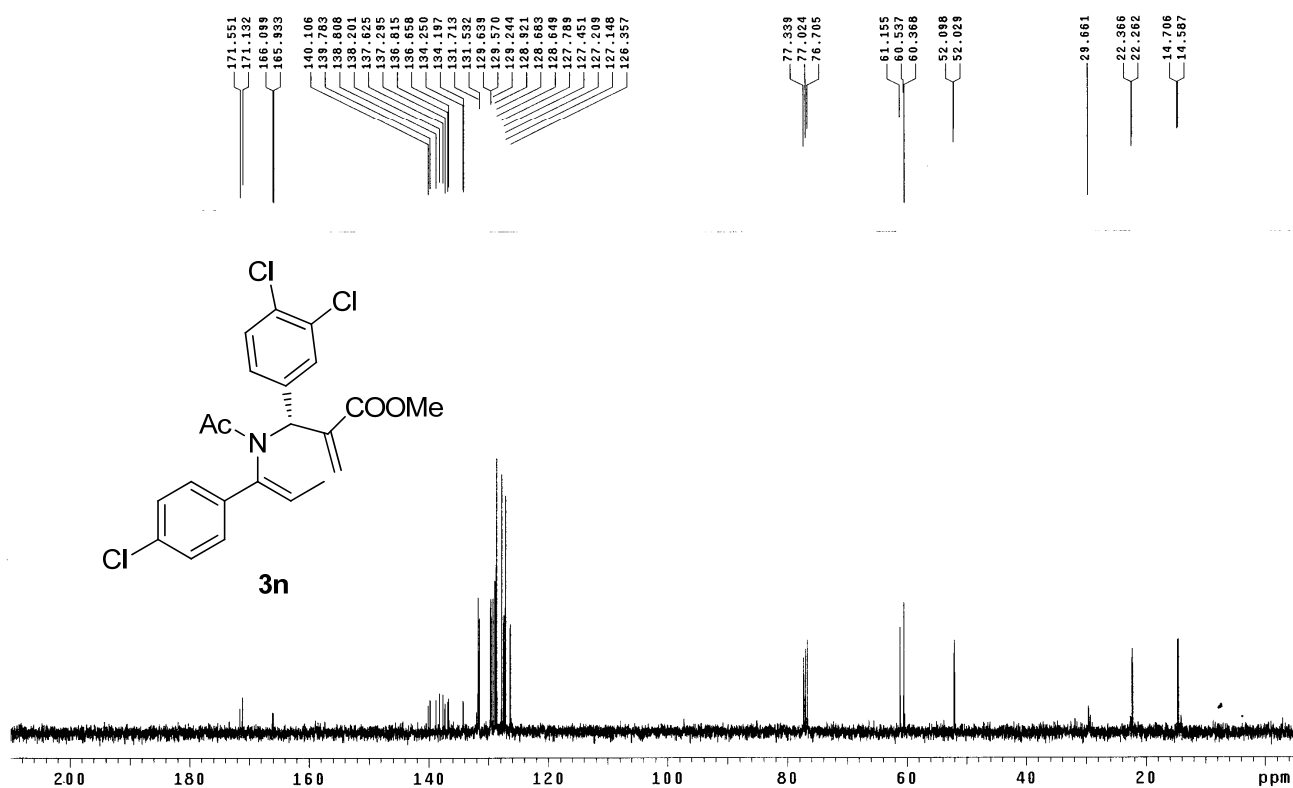

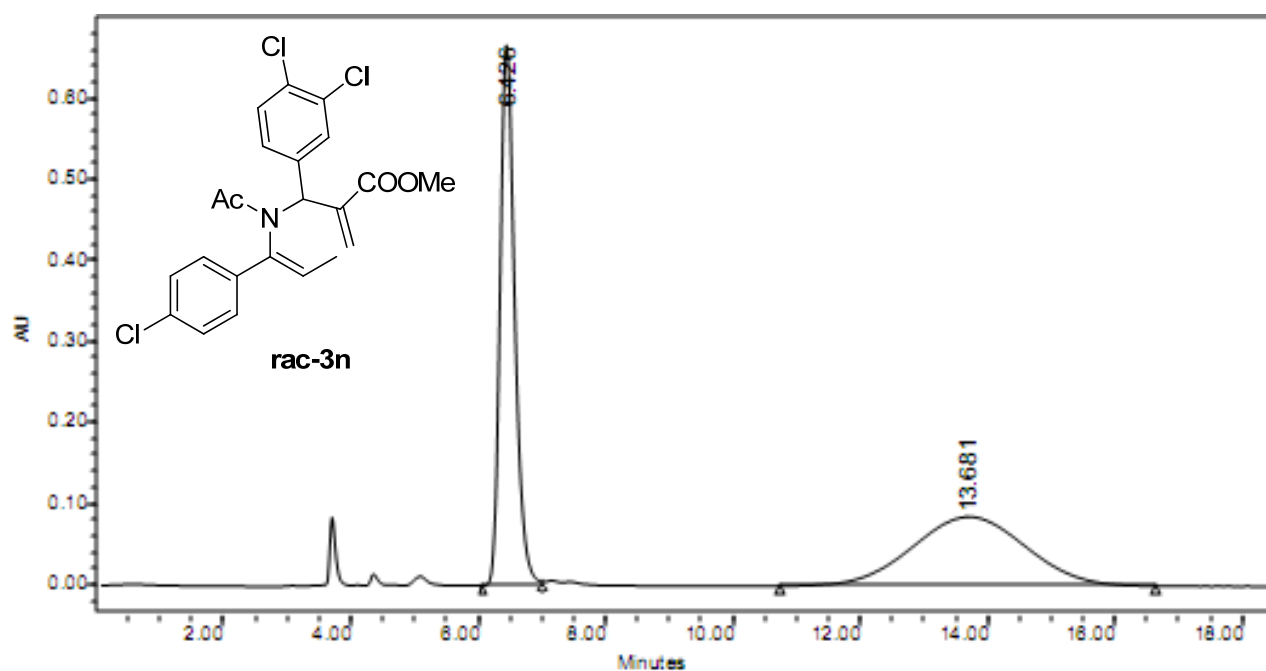

|   | RT<br>(min) | Area<br>( V *sec) | % Area | Height<br>( V ) | %<br>Height |
|---|-------------|-------------------|--------|-----------------|-------------|
| 1 | 6.426       | 10687467          | 49.91  | 668039          | 88.64       |
| 2 | 13.681      | 10724424          | 50.09  | 85601           | 11.36       |

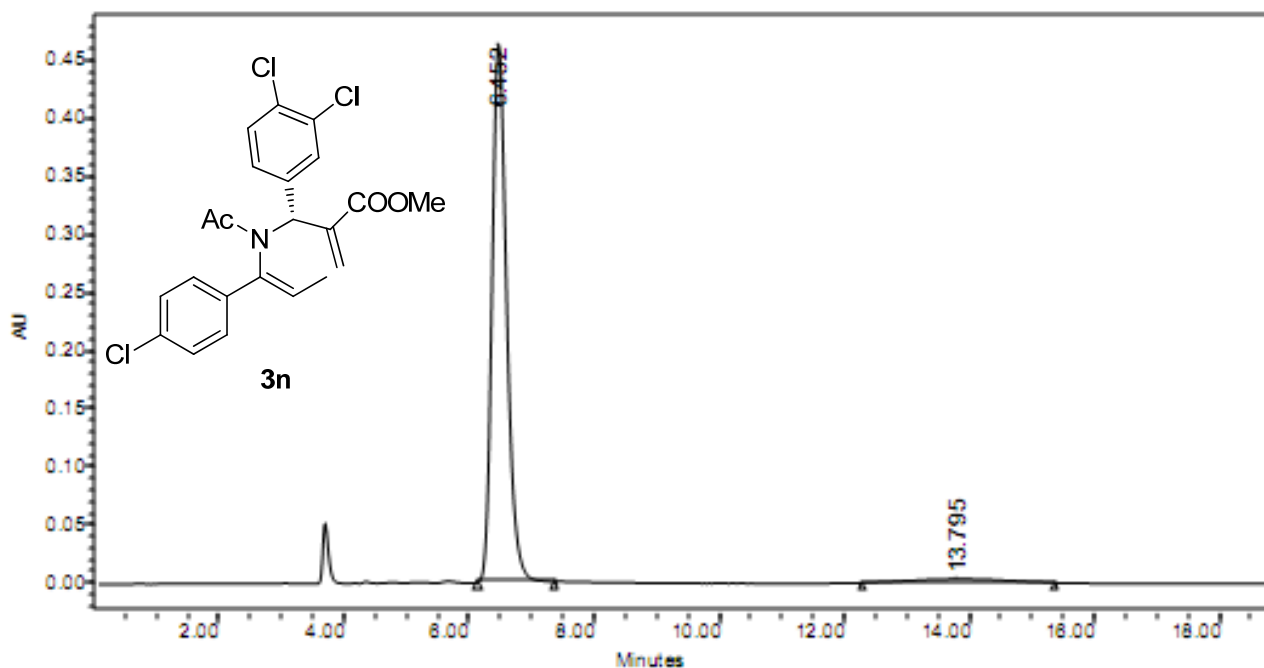

|   | RT<br>(min) | Area<br>( V *sec) | % Area | Height<br>( V ) | %<br>Height |
|---|-------------|-------------------|--------|-----------------|-------------|
| 1 | 6.452       | 7514491           | 95.69  | 463600          | 99.30       |
| 2 | 13.795      | 338760            | 4.31   | 3265            | 0.70        |

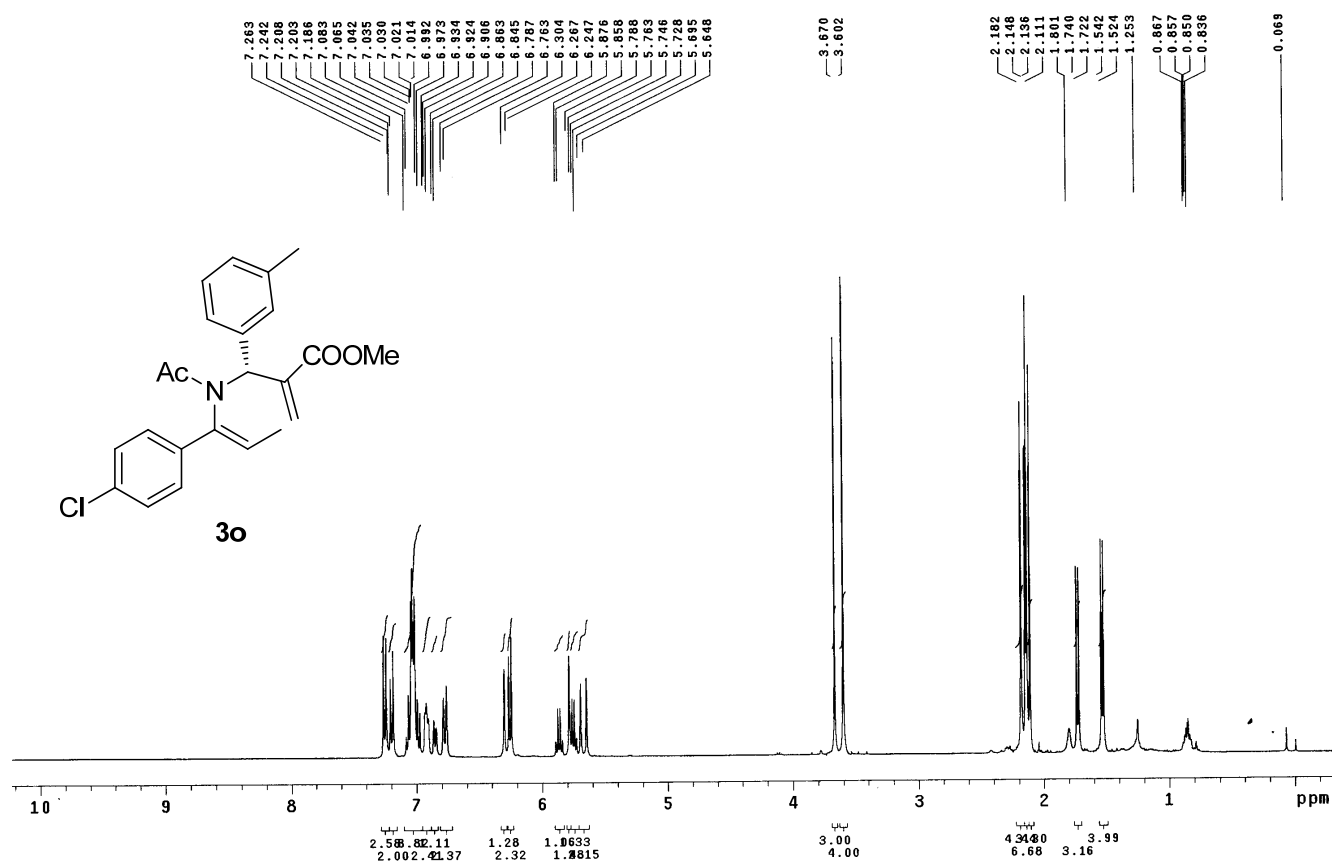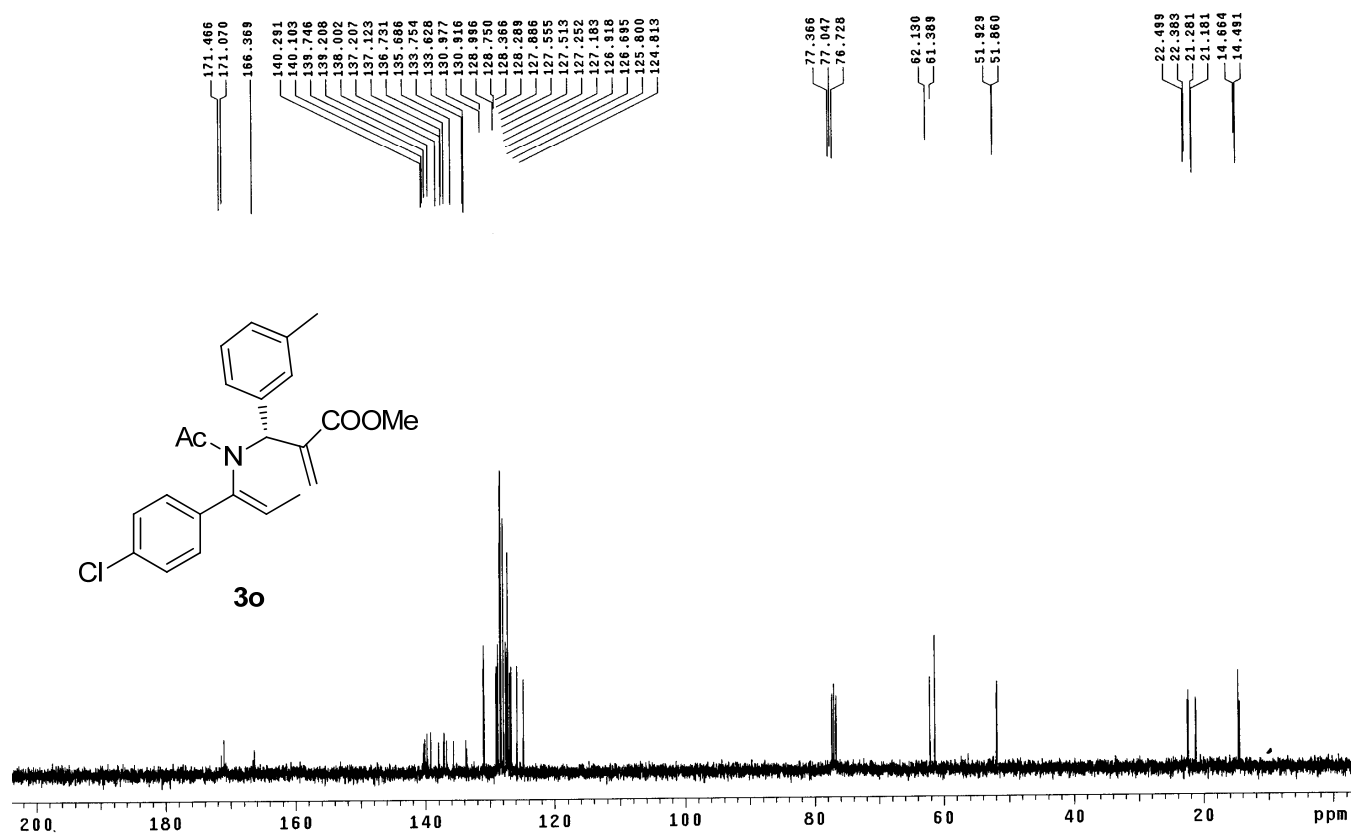

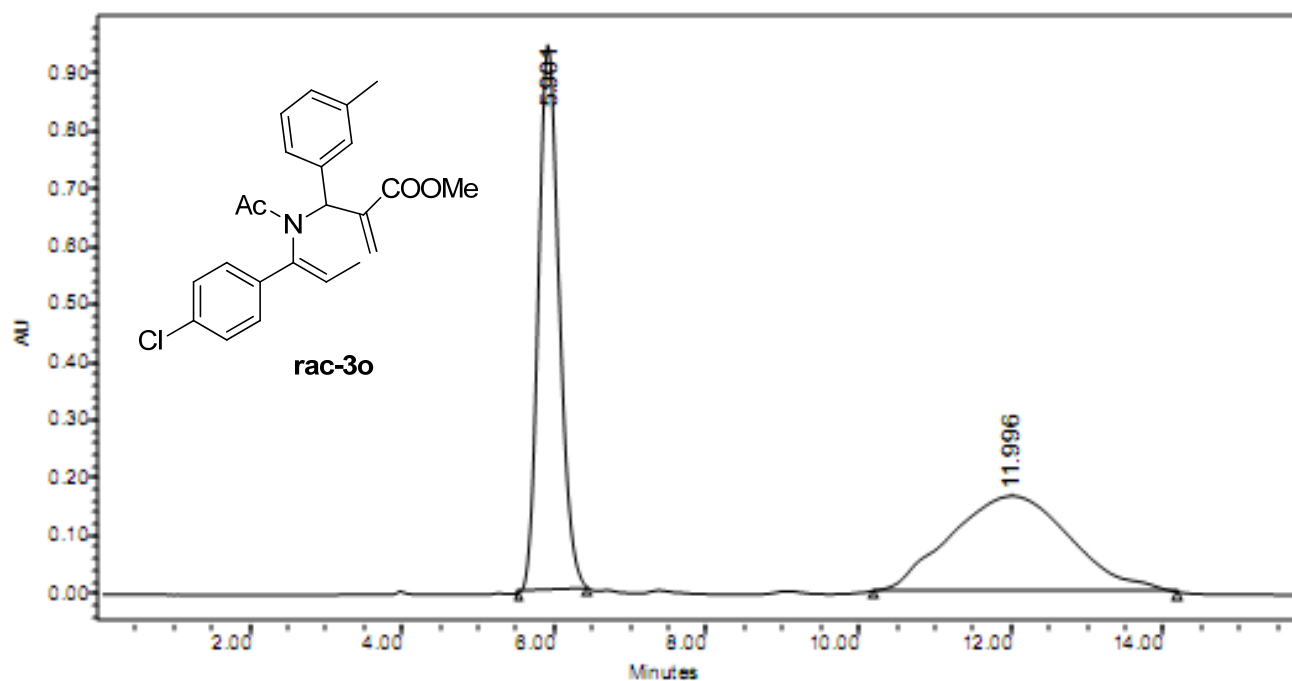

|   | RT<br>(min) | Area<br>(V*sec) | % Area | Height<br>(V) | % Height |
|---|-------------|-----------------|--------|---------------|----------|
| 1 | 5.901       | 17930111        | 49.59  | 943638        | 85.11    |
| 2 | 11.996      | 18224114        | 50.41  | 165124        | 14.89    |

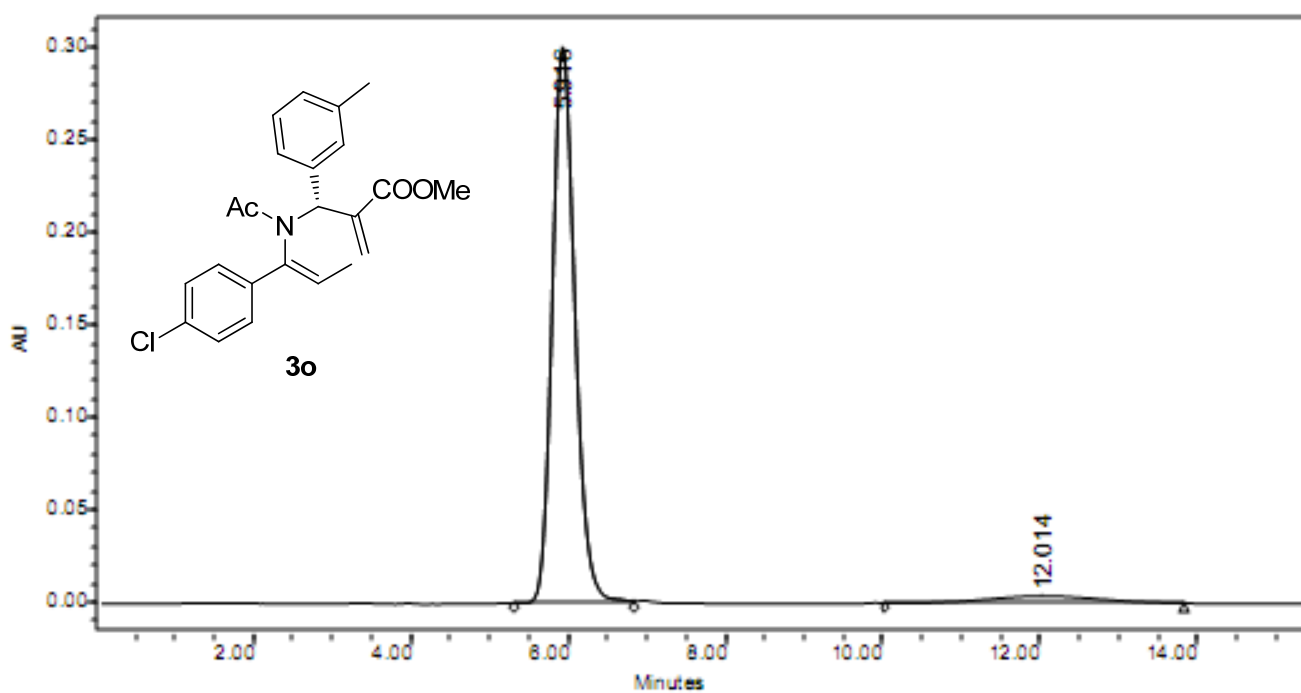

|   | RT<br>(min) | Area<br>(V*sec) | % Area | Height<br>(V) | % Height |
|---|-------------|-----------------|--------|---------------|----------|
| 1 | 5.916       | 6042501         | 93.46  | 300658        | 98.67    |
| 2 | 12.014      | 422939          | 6.54   | 4042          | 1.33     |

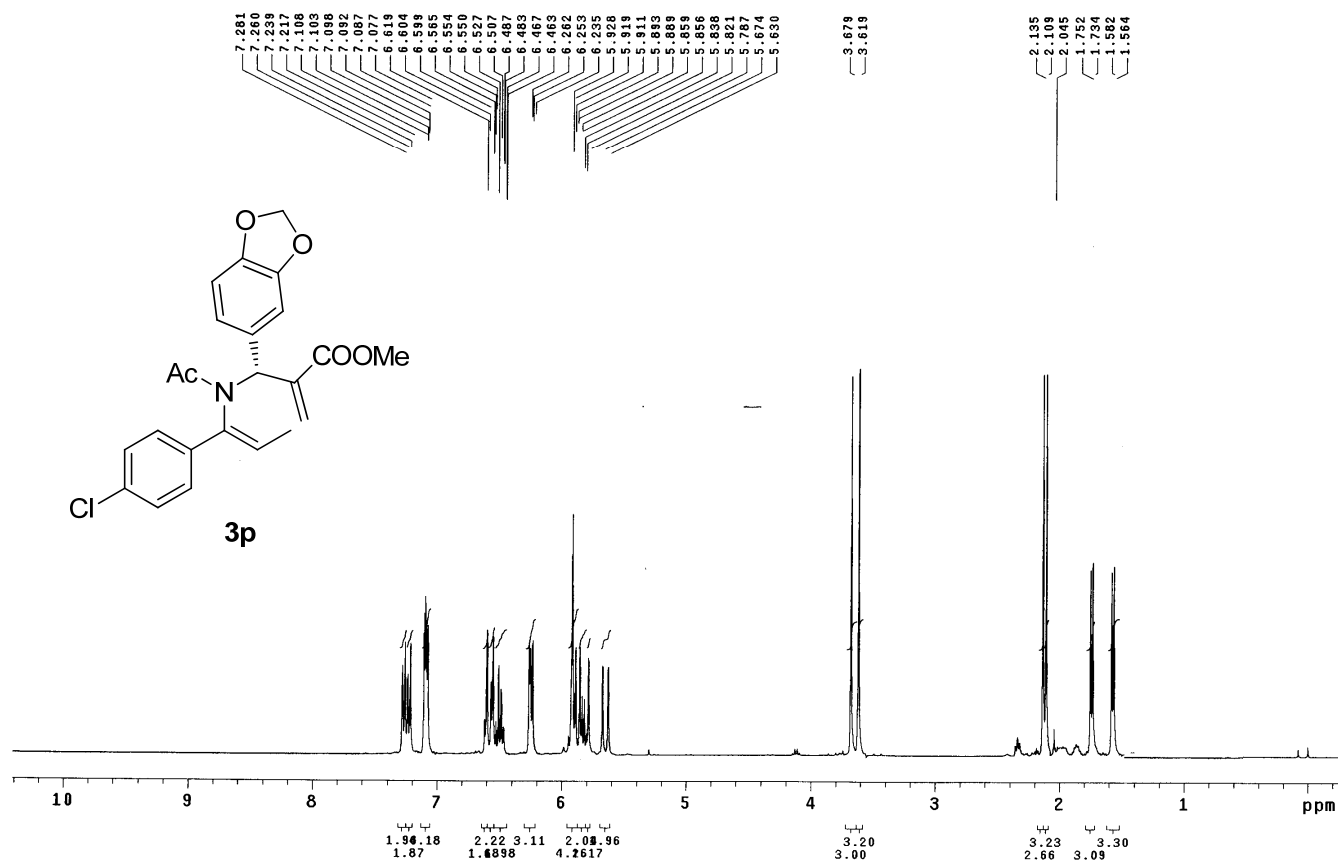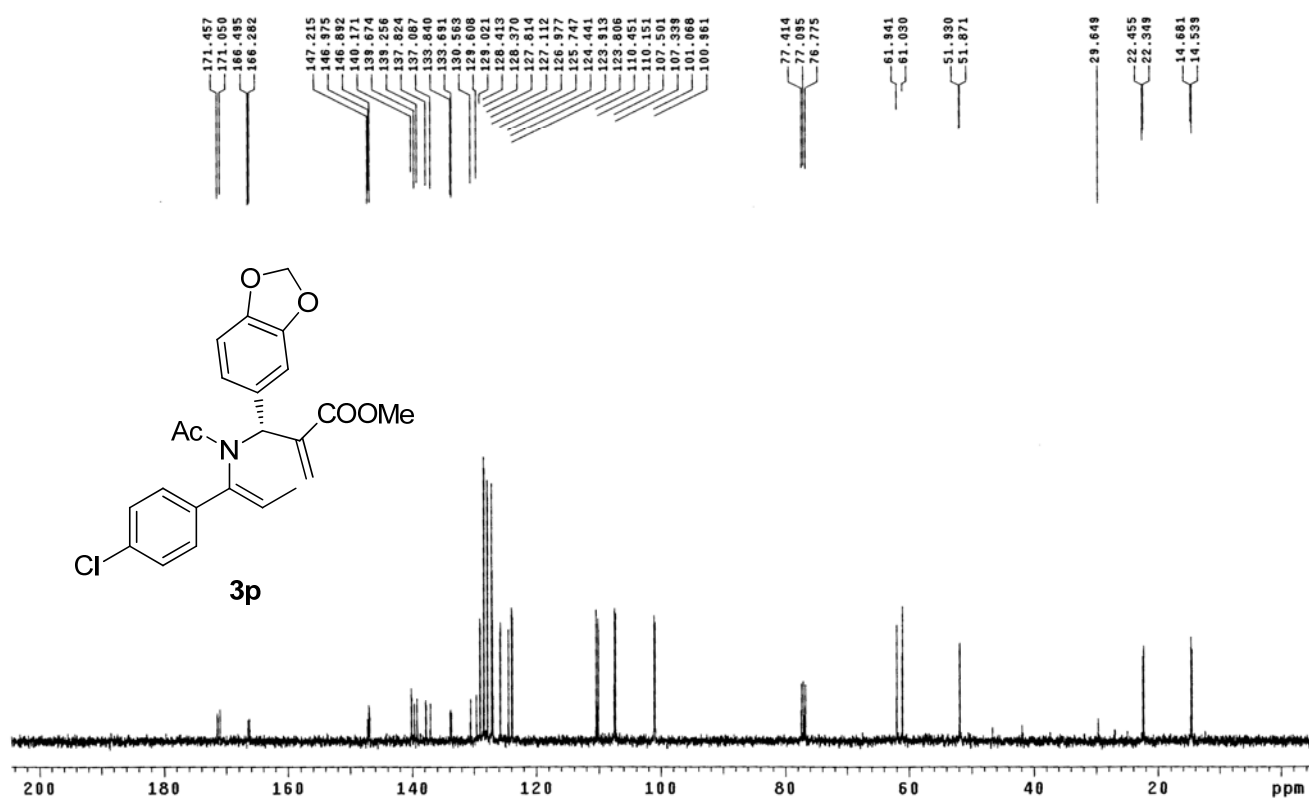

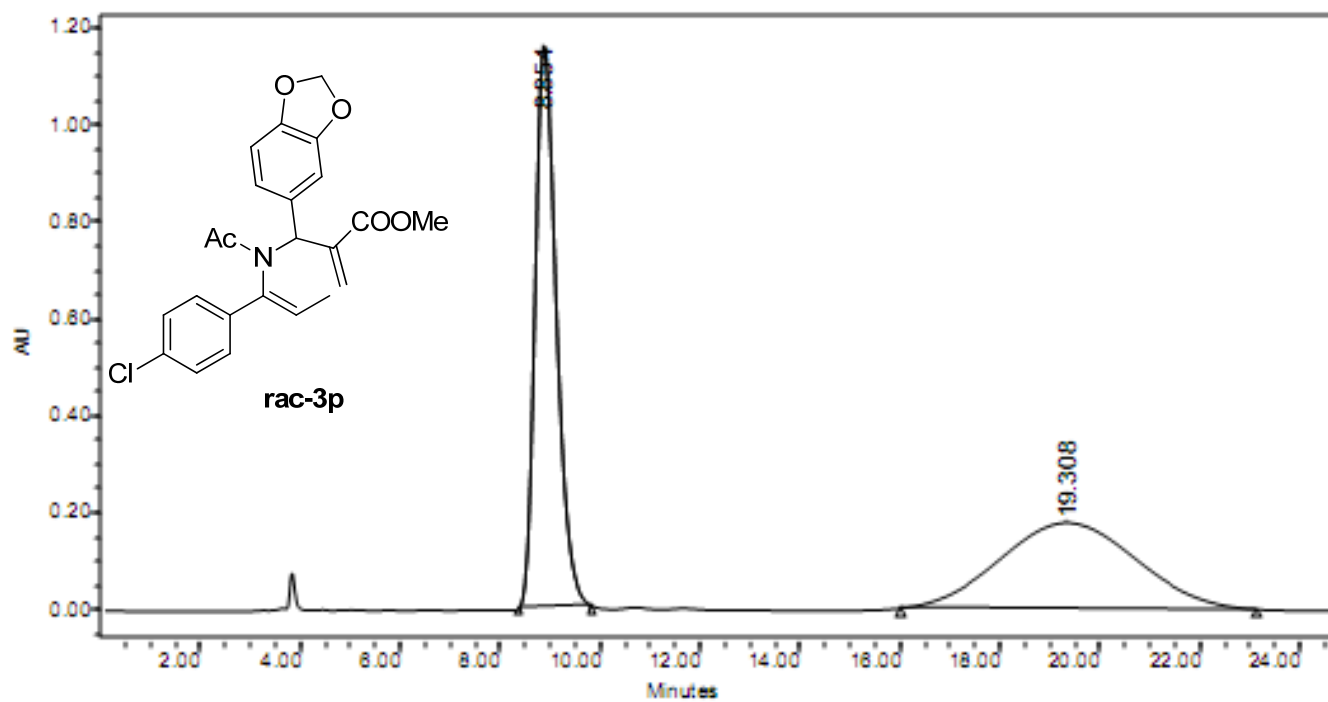

|   | RT<br>(min) | Area<br>(V *sec) | % Area | Height<br>(V) | %<br>Height |
|---|-------------|------------------|--------|---------------|-------------|
| 1 | 8.854       | 34211022         | 50.37  | 1157552       | 86.72       |
| 2 | 19.308      | 33710088         | 49.63  | 177269        | 13.28       |

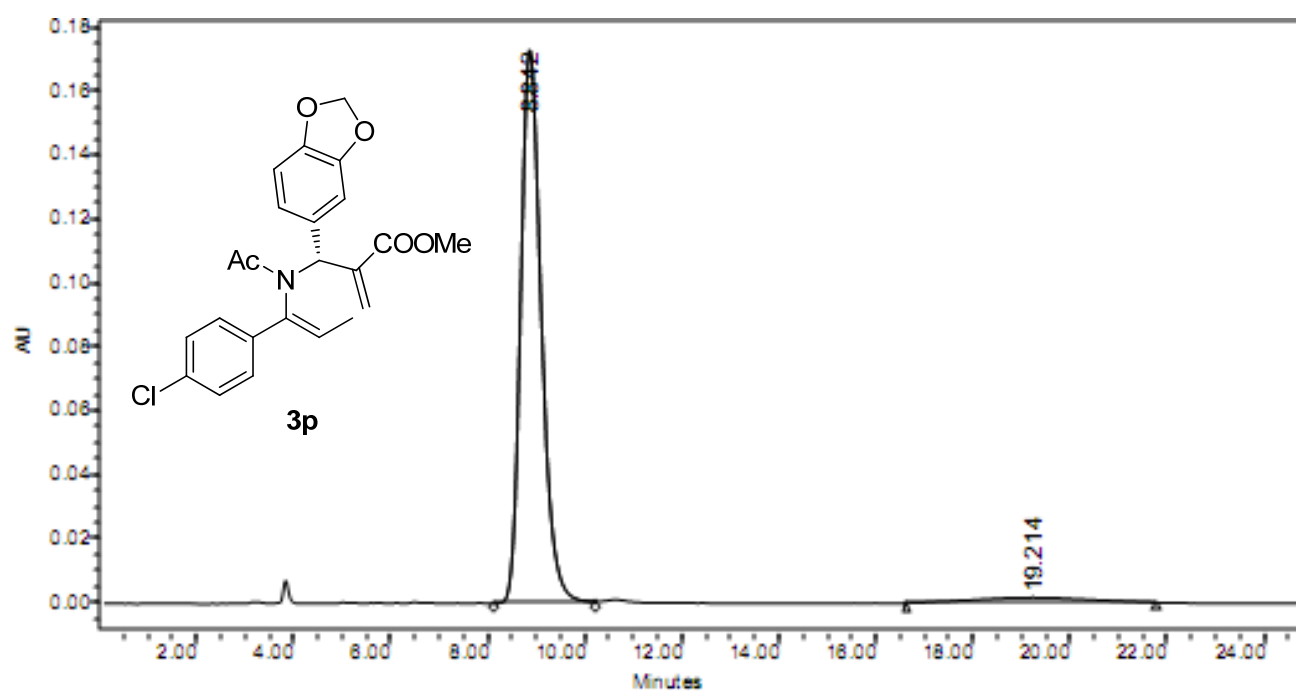

|   | RT<br>(min) | Area<br>(V *sec) | % Area | Height<br>(V) | %<br>Height |
|---|-------------|------------------|--------|---------------|-------------|
| 1 | 8.842       | 5120365          | 94.78  | 173115        | 99.02       |
| 2 | 19.214      | 282267           | 5.22   | 1719          | 0.98        |



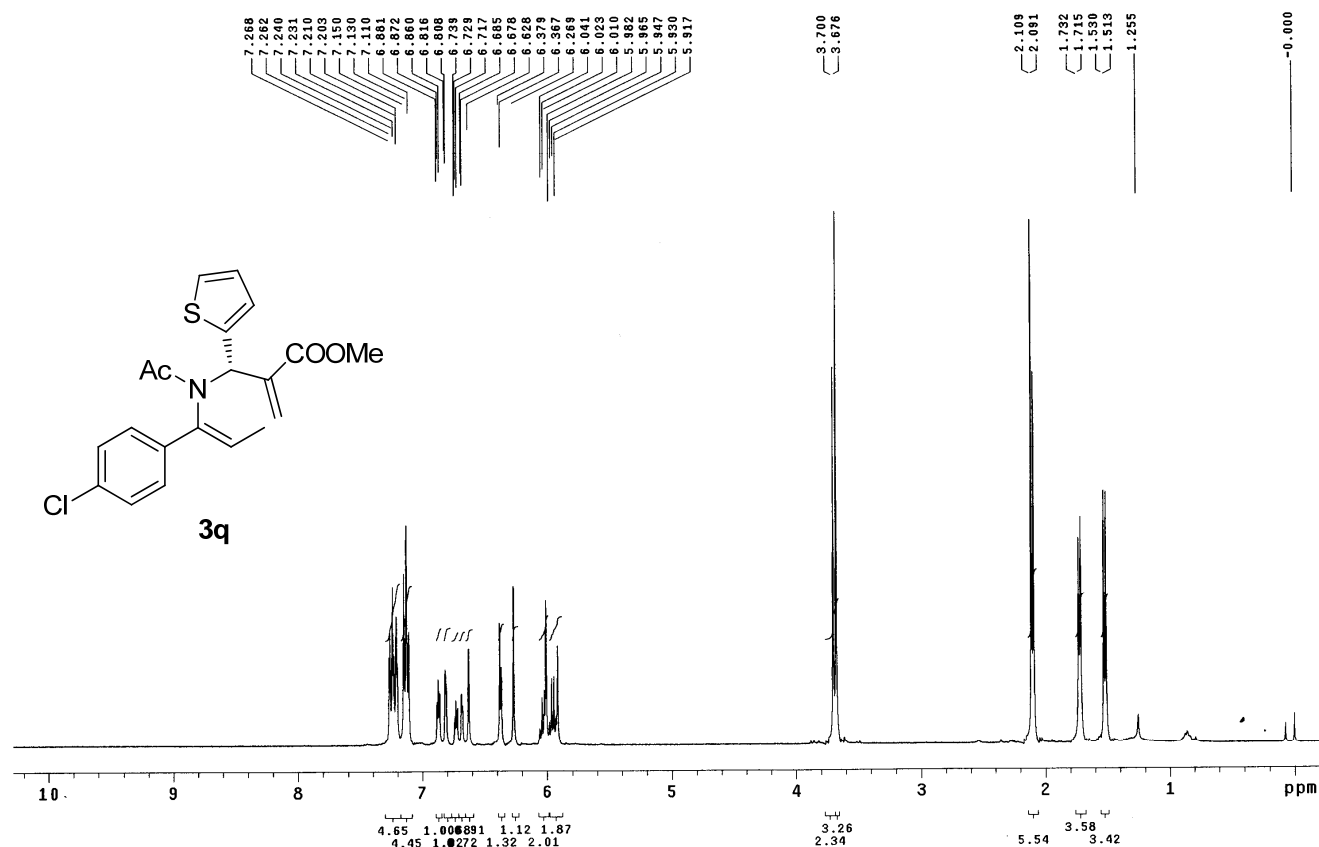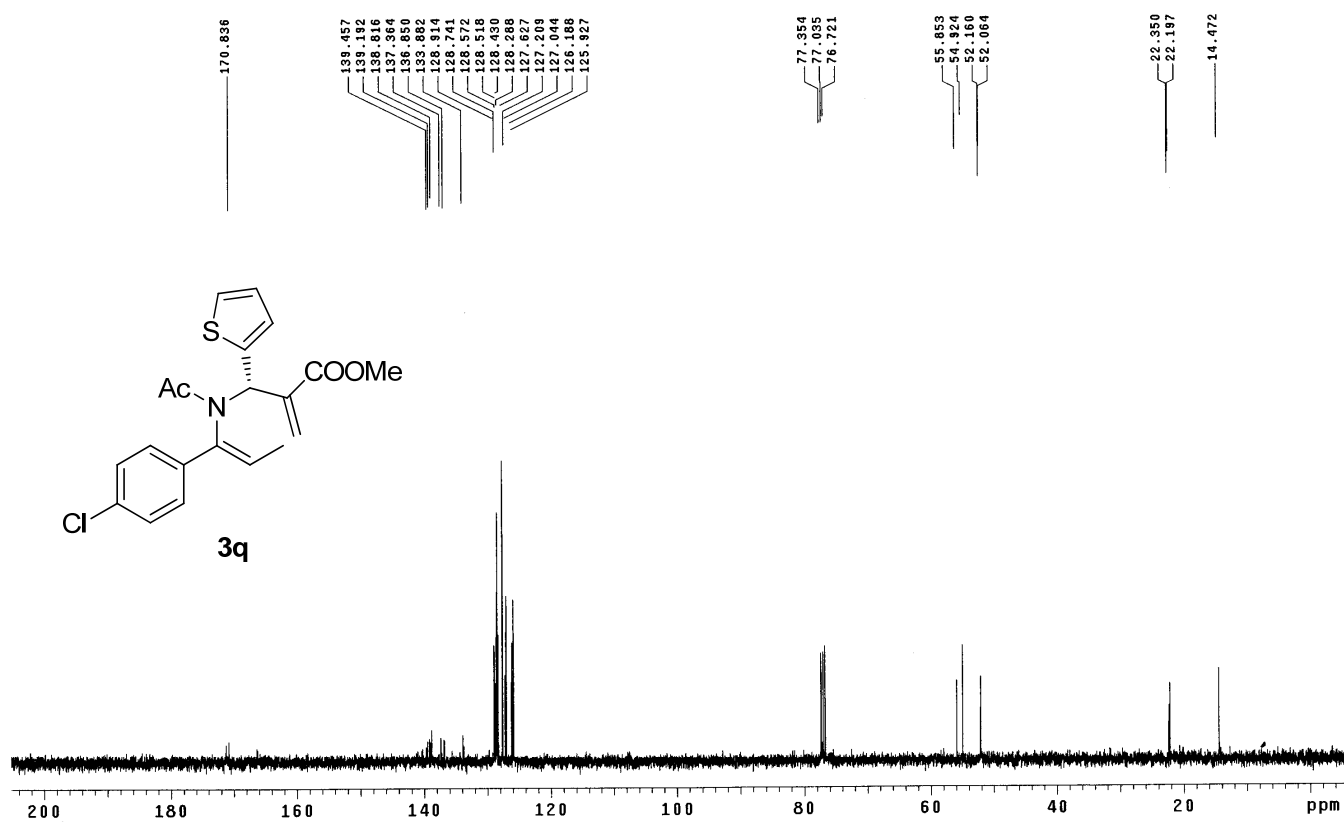

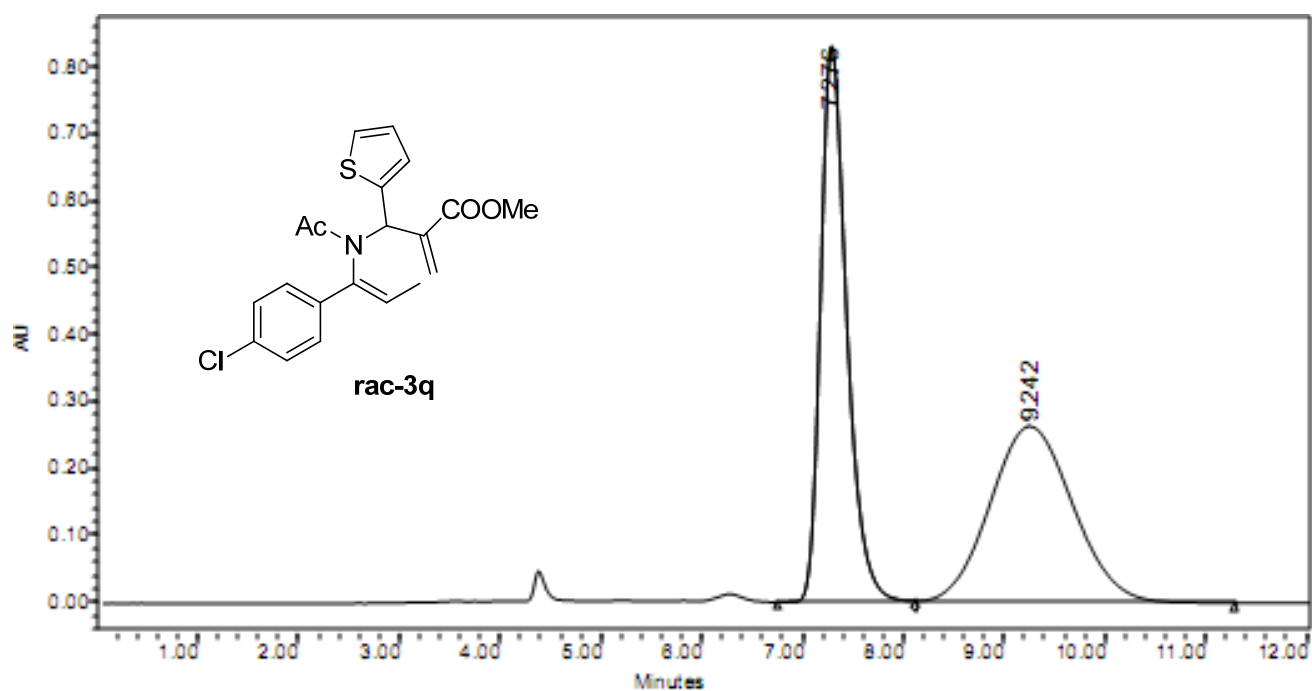

|   | RT<br>(min) | Area<br>(V*sec) | % Area | Height<br>(V) | %<br>Height |
|---|-------------|-----------------|--------|---------------|-------------|
| 1 | 7.276       | 15094153        | 49.94  | 832711        | 75.94       |
| 2 | 9.242       | 15128701        | 50.06  | 263774        | 24.06       |

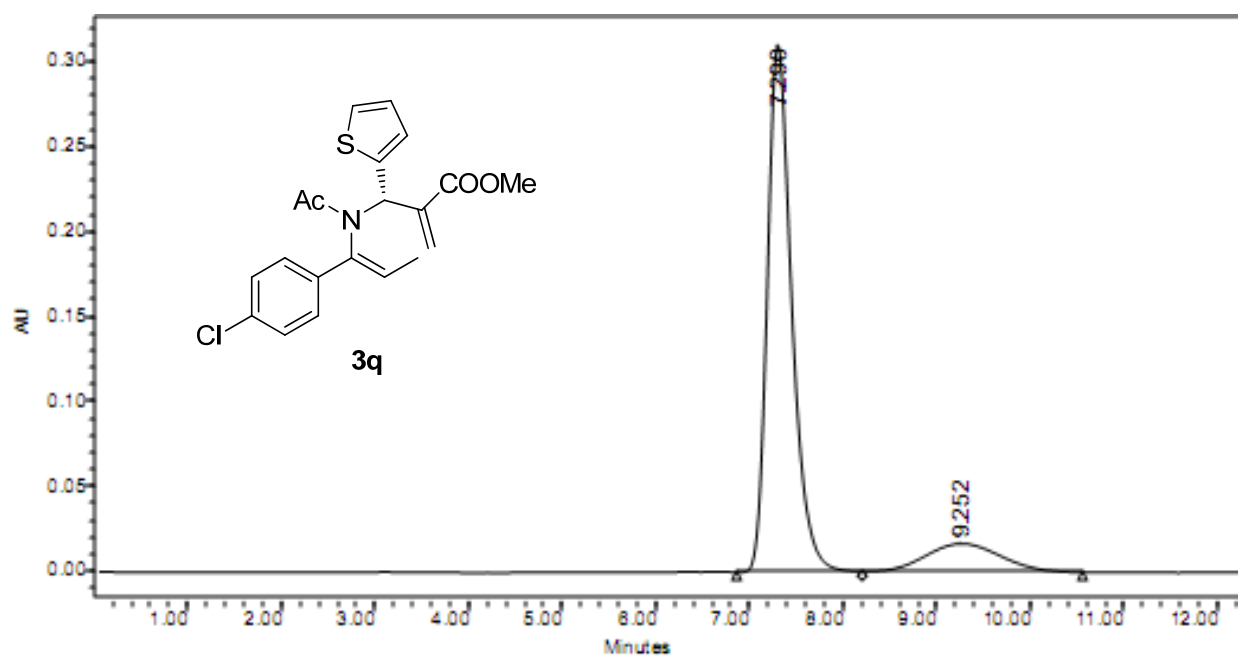

|   | RT<br>(min) | Area<br>(V*sec) | % Area | Height<br>(V) | %<br>Height |
|---|-------------|-----------------|--------|---------------|-------------|
| 1 | 7.290       | 5638198         | 85.38  | 311088        | 94.85       |
| 2 | 9.252       | 965720          | 14.62  | 16887         | 5.15        |

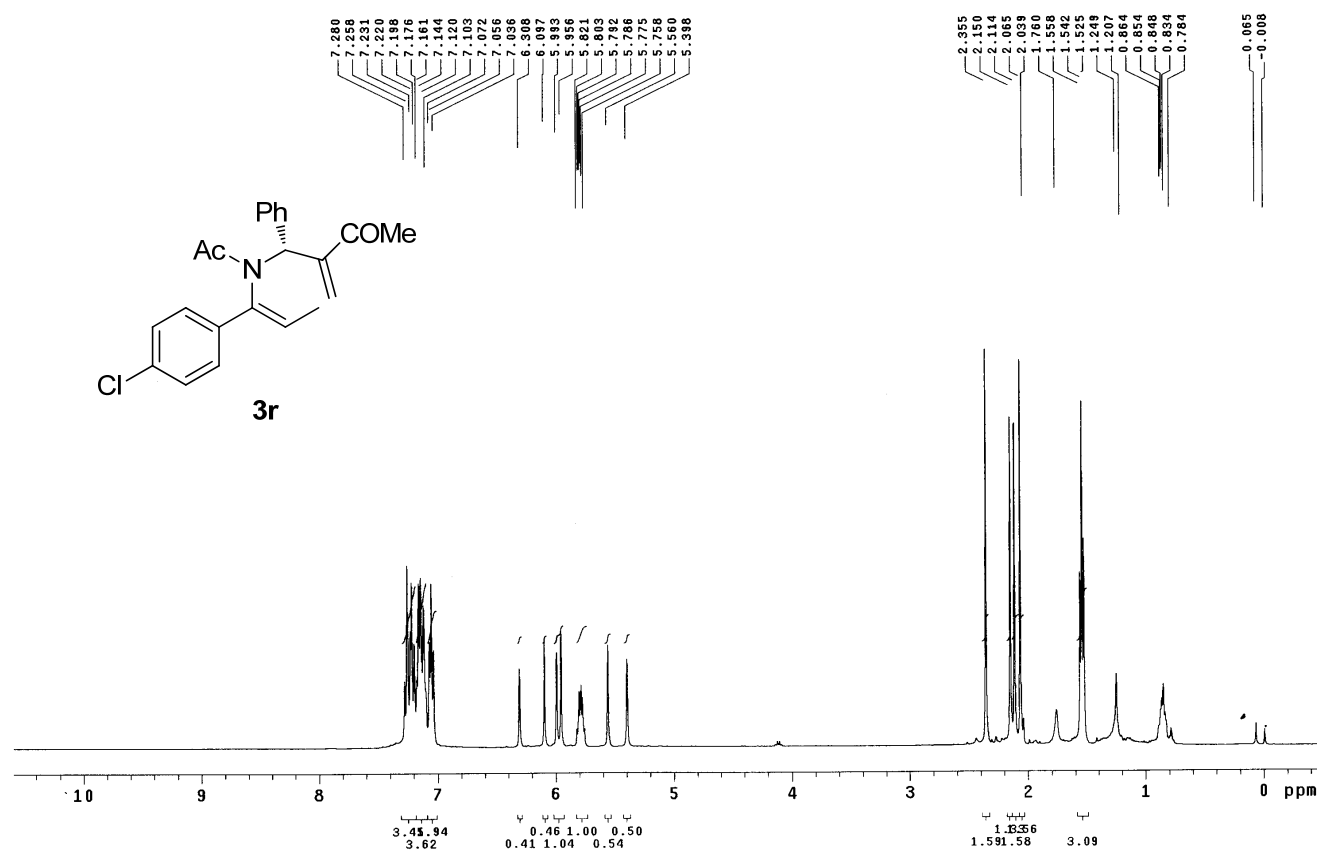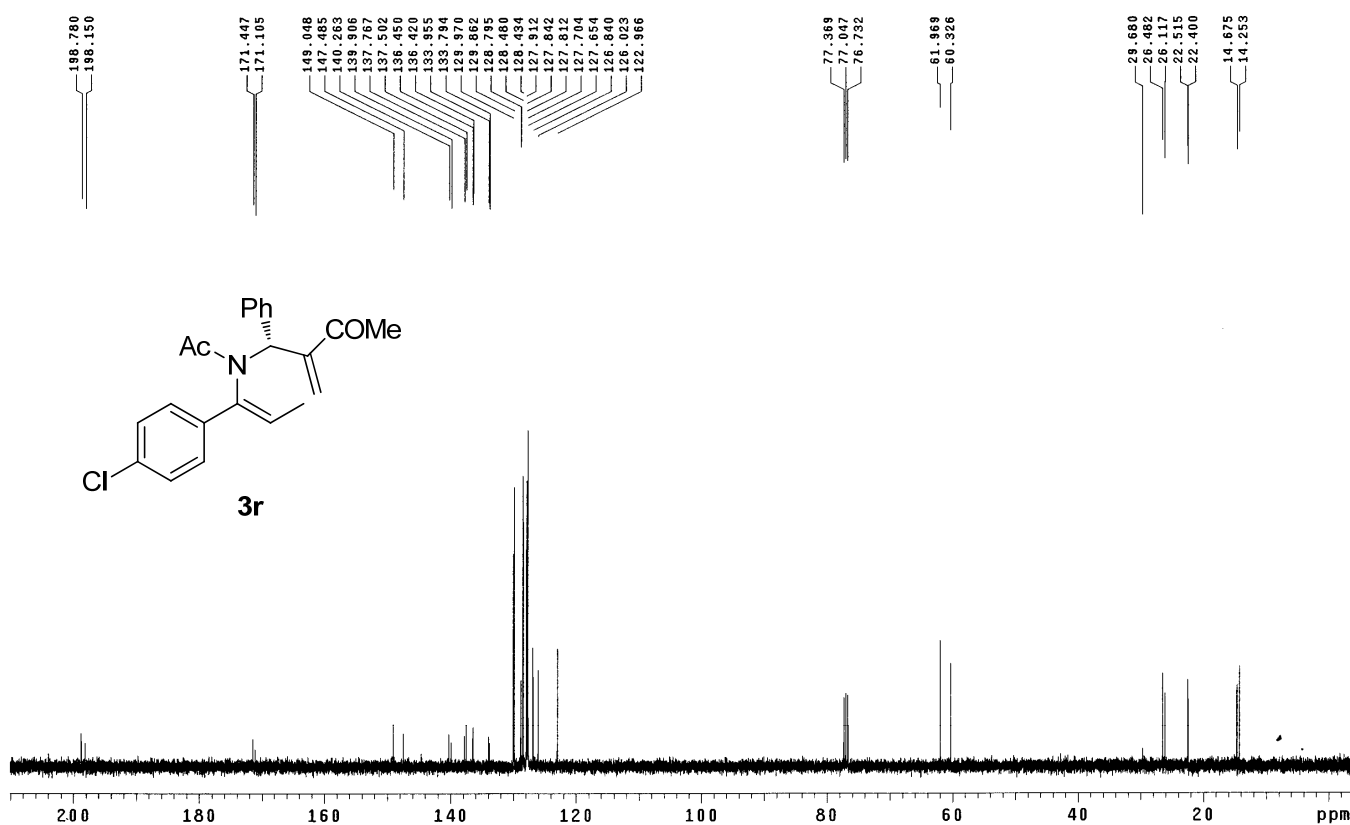

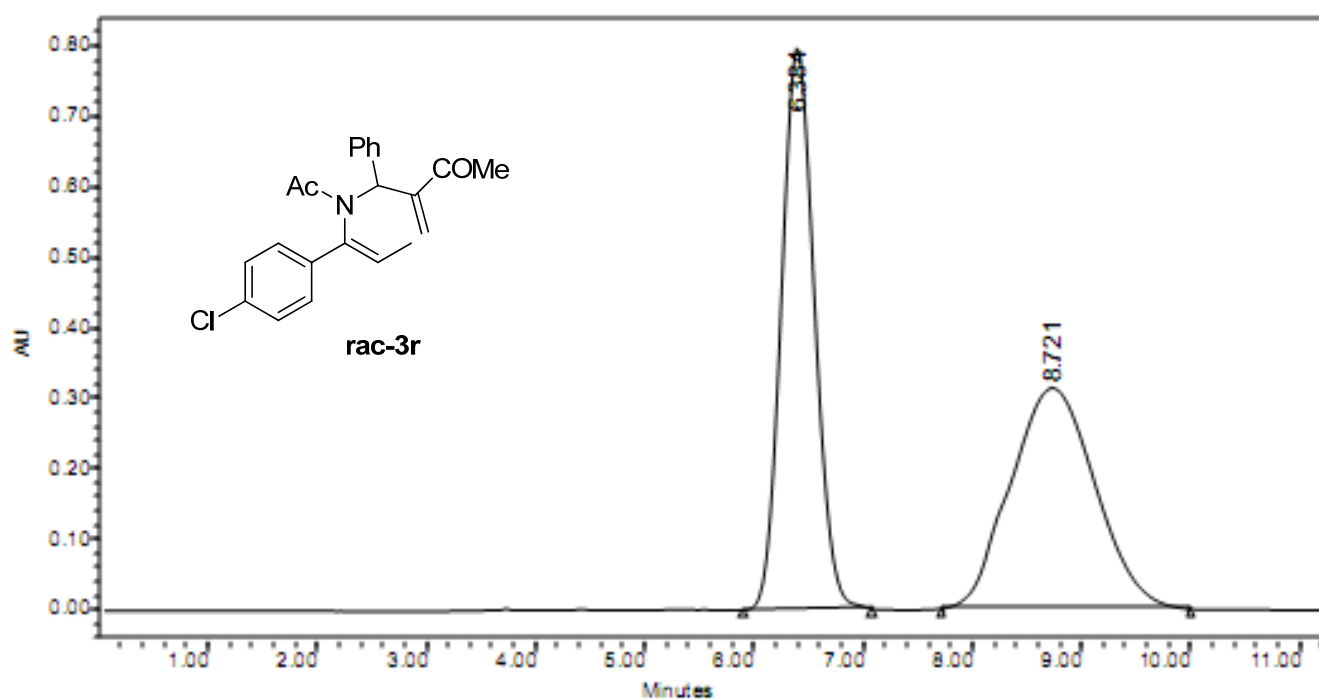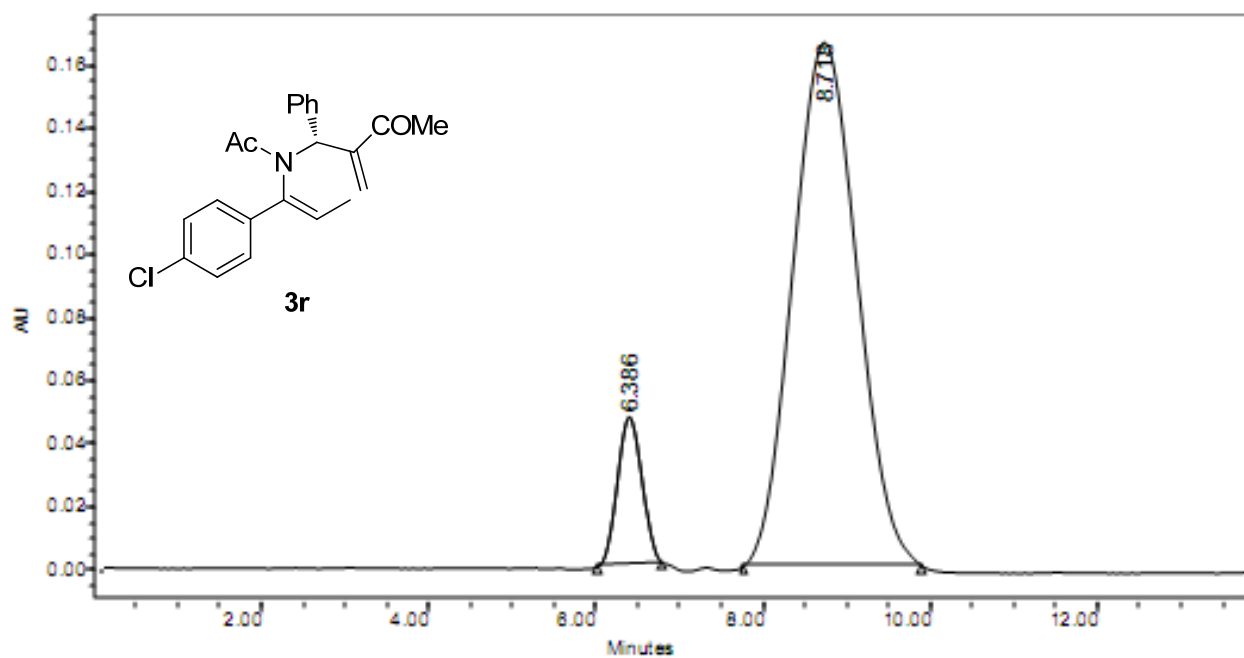

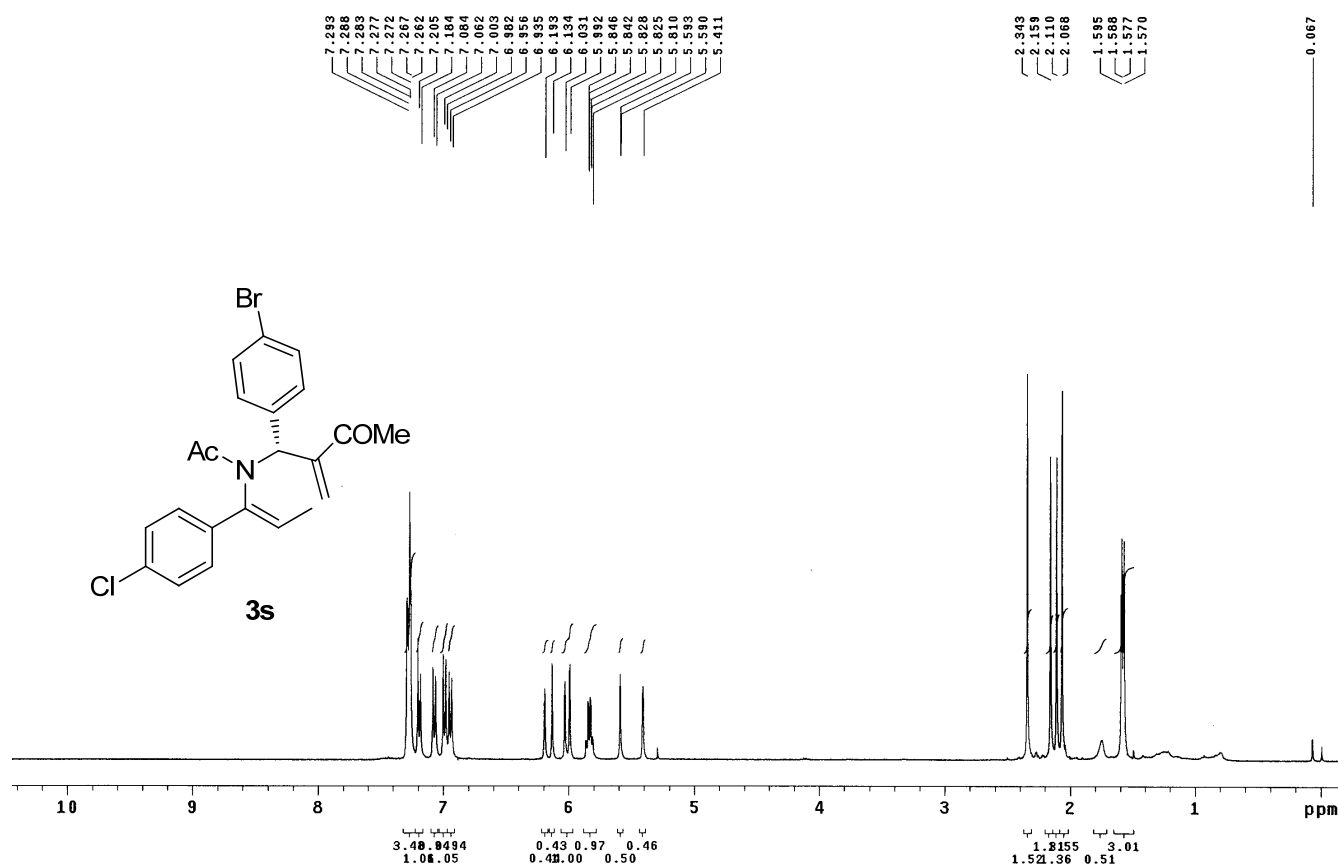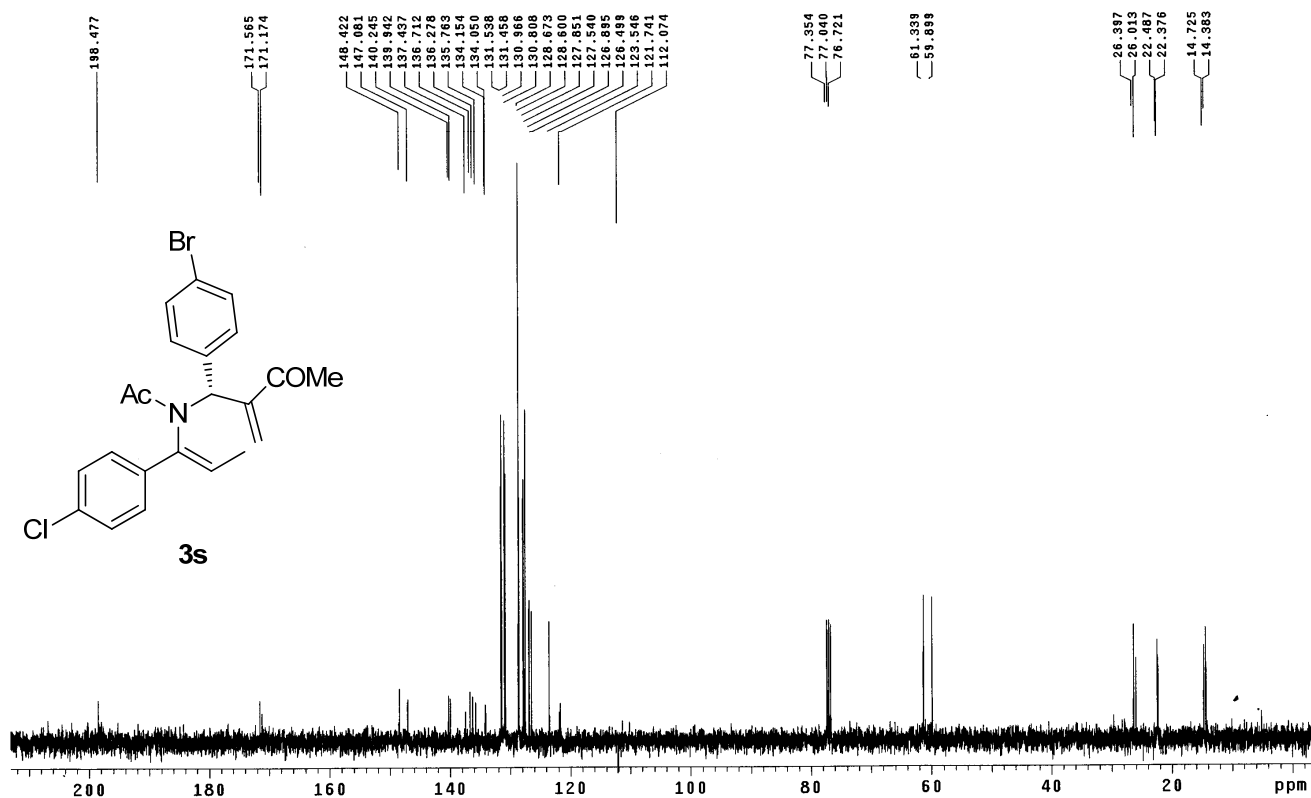

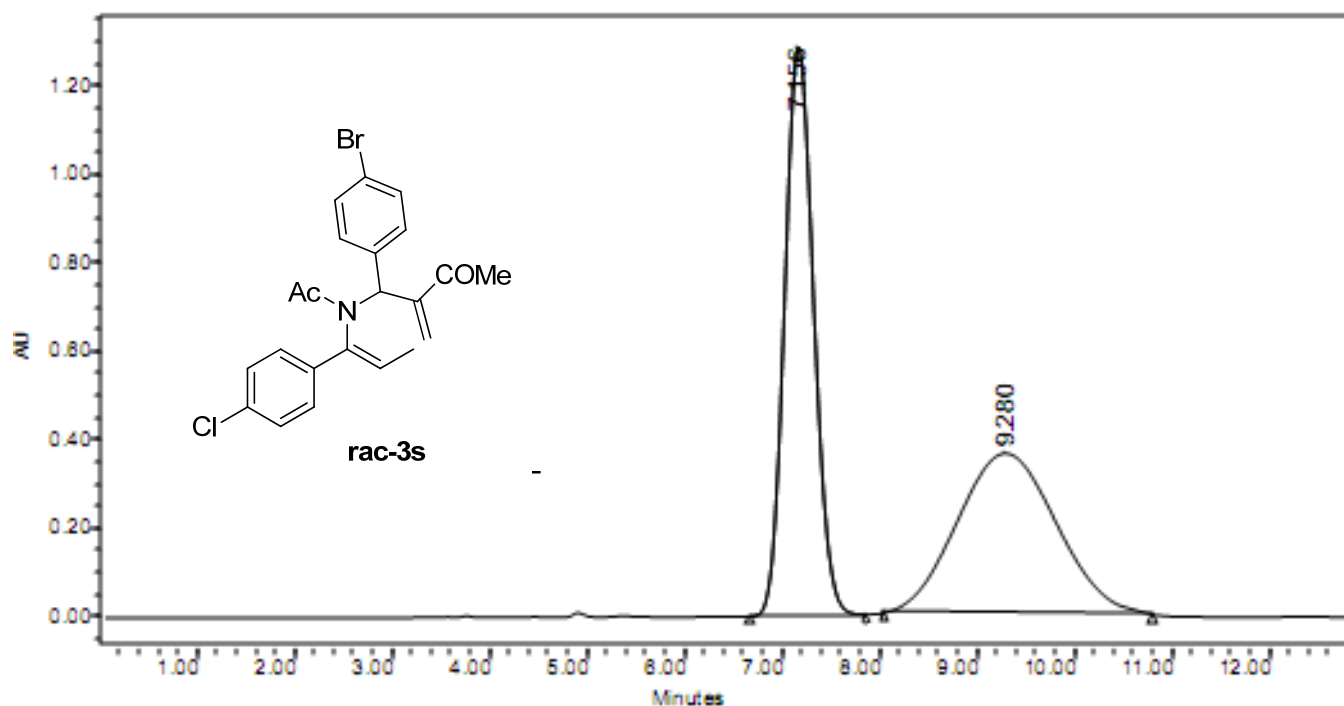

|   | RT<br>(min) | Area<br>(V*sec) | % Area | Height<br>(V) | % Height |
|---|-------------|-----------------|--------|---------------|----------|
| 1 | 7.156       | 26758879        | 51.09  | 1289703       | 78.07    |
| 2 | 9.280       | 25614069        | 48.91  | 362363        | 21.93    |

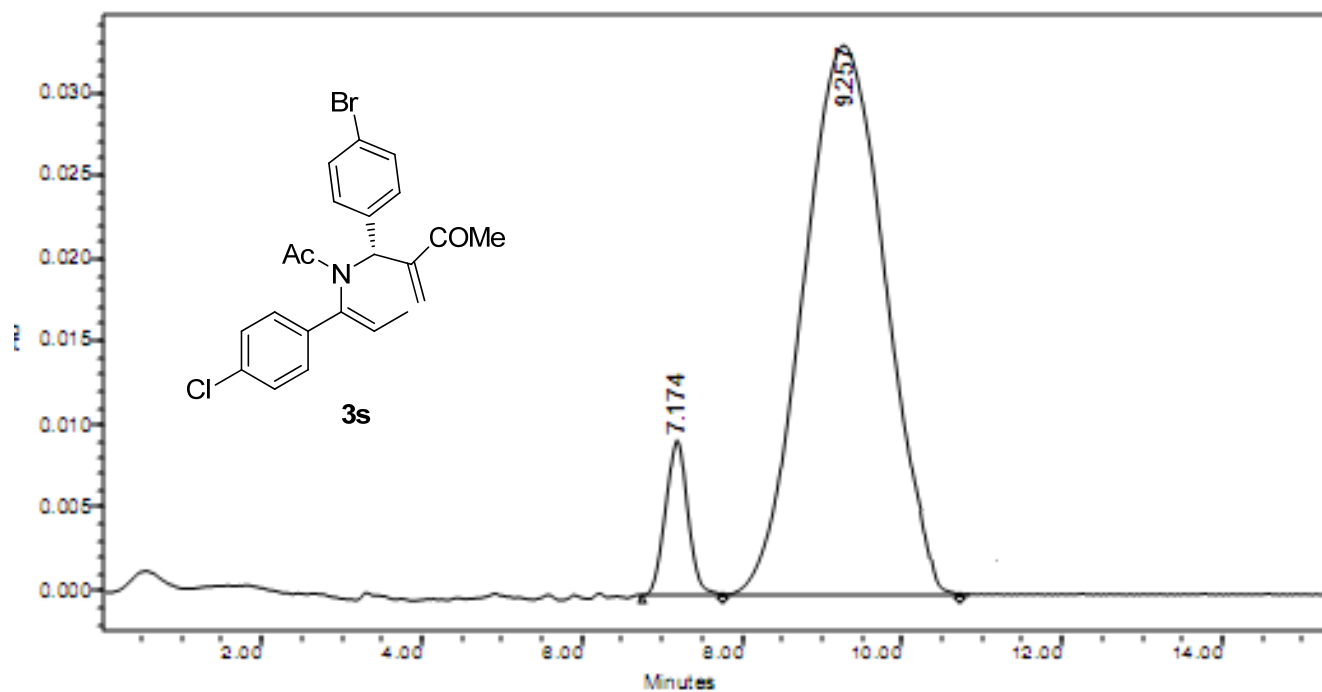

|   | RT<br>(min) | Area<br>(V*sec) | % Area | Height<br>(V) | % Height |
|---|-------------|-----------------|--------|---------------|----------|
| 1 | 7.174       | 181974          | 7.03   | 9309          | 21.94    |
| 2 | 9.257       | 2405836         | 92.97  | 33123         | 78.06    |

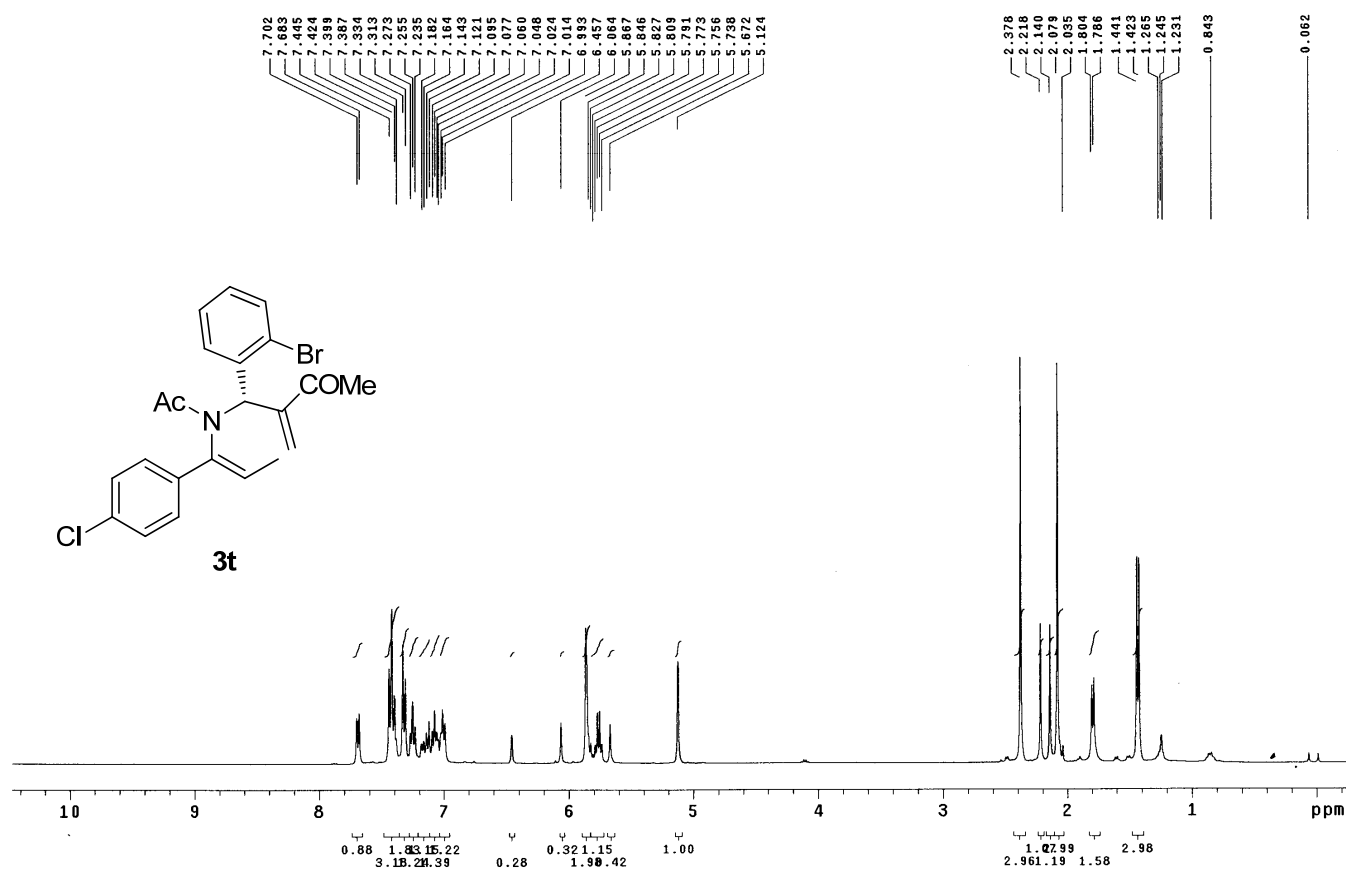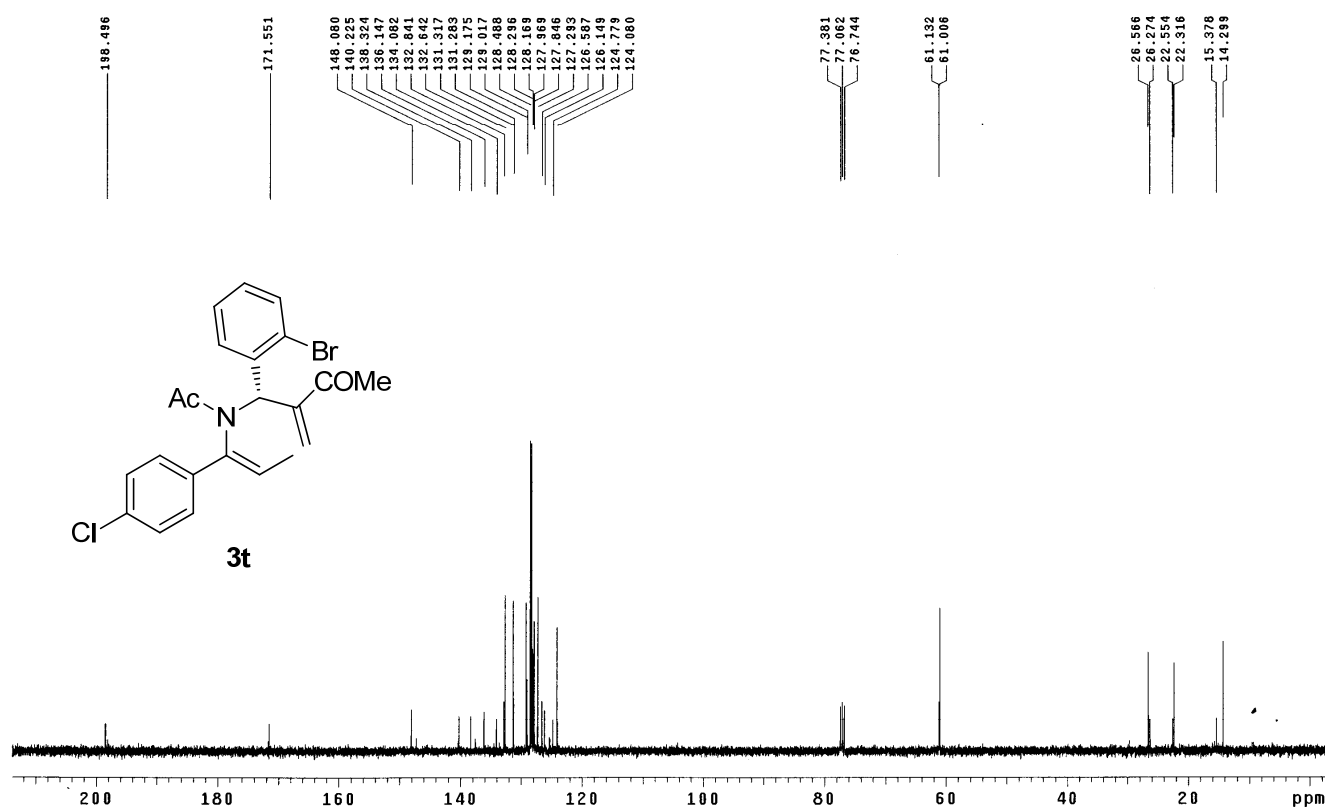

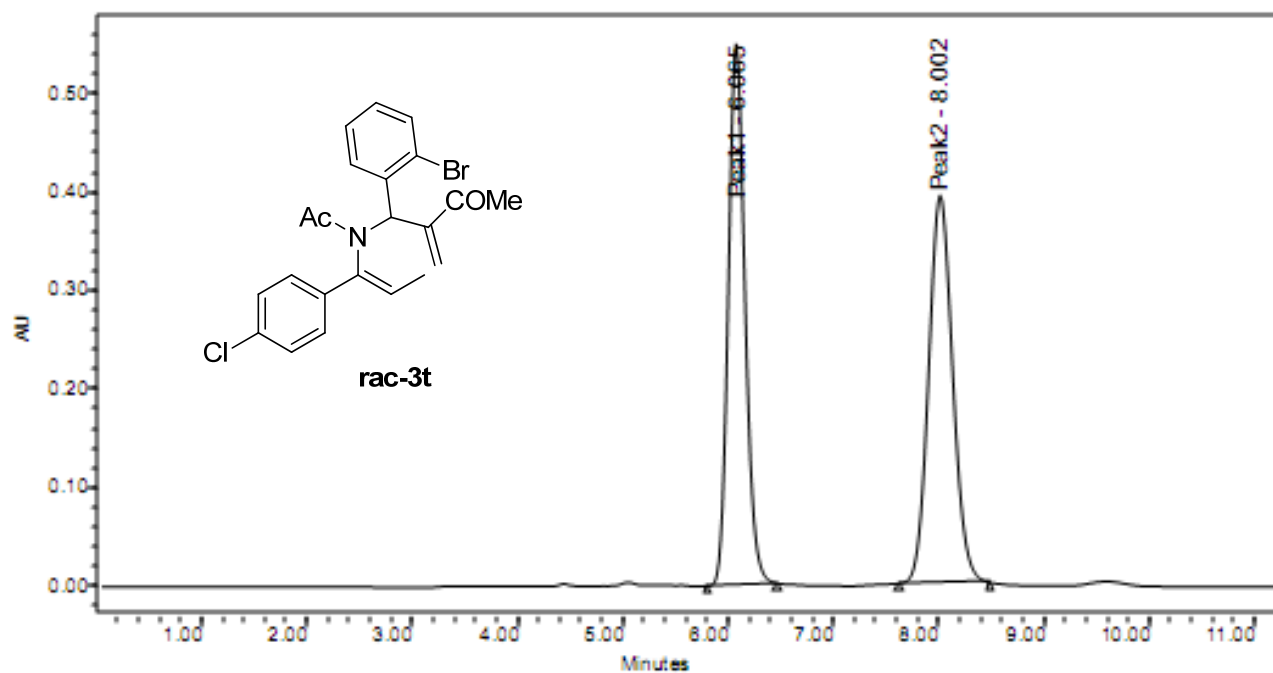

|   | Peak Name | RT (min) | Area ( V *sec) | % Area | Height ( V ) | % Height |
|---|-----------|----------|----------------|--------|--------------|----------|
| 1 | Peak1     | 6.065    | 6037236        | 49.16  | 548634       | 58.22    |
| 2 | Peak2     | 8.002    | 6244644        | 50.84  | 393696       | 41.78    |

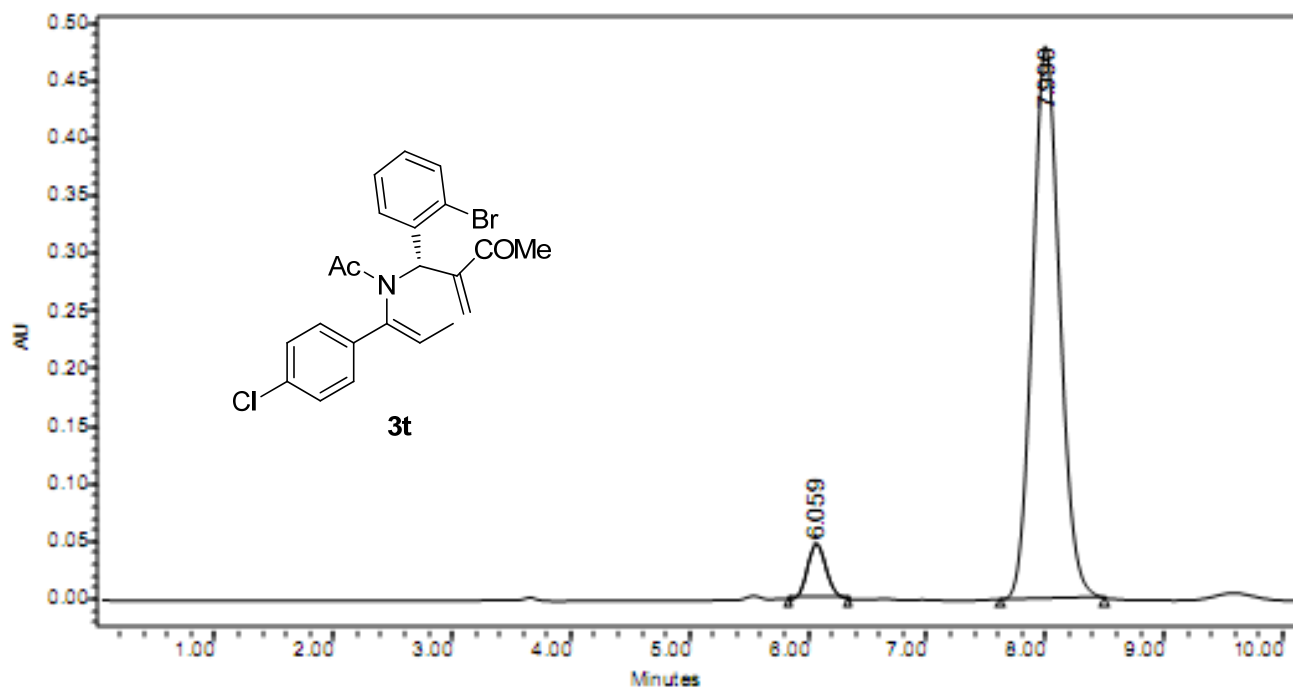

|   | RT (min) | Area ( V *sec) | % Area | Height ( V ) | % Height |
|---|----------|----------------|--------|--------------|----------|
| 1 | 6.059    | 527155         | 6.45   | 47848        | 9.06     |
| 2 | 7.990    | 7646613        | 93.55  | 480174       | 90.94    |



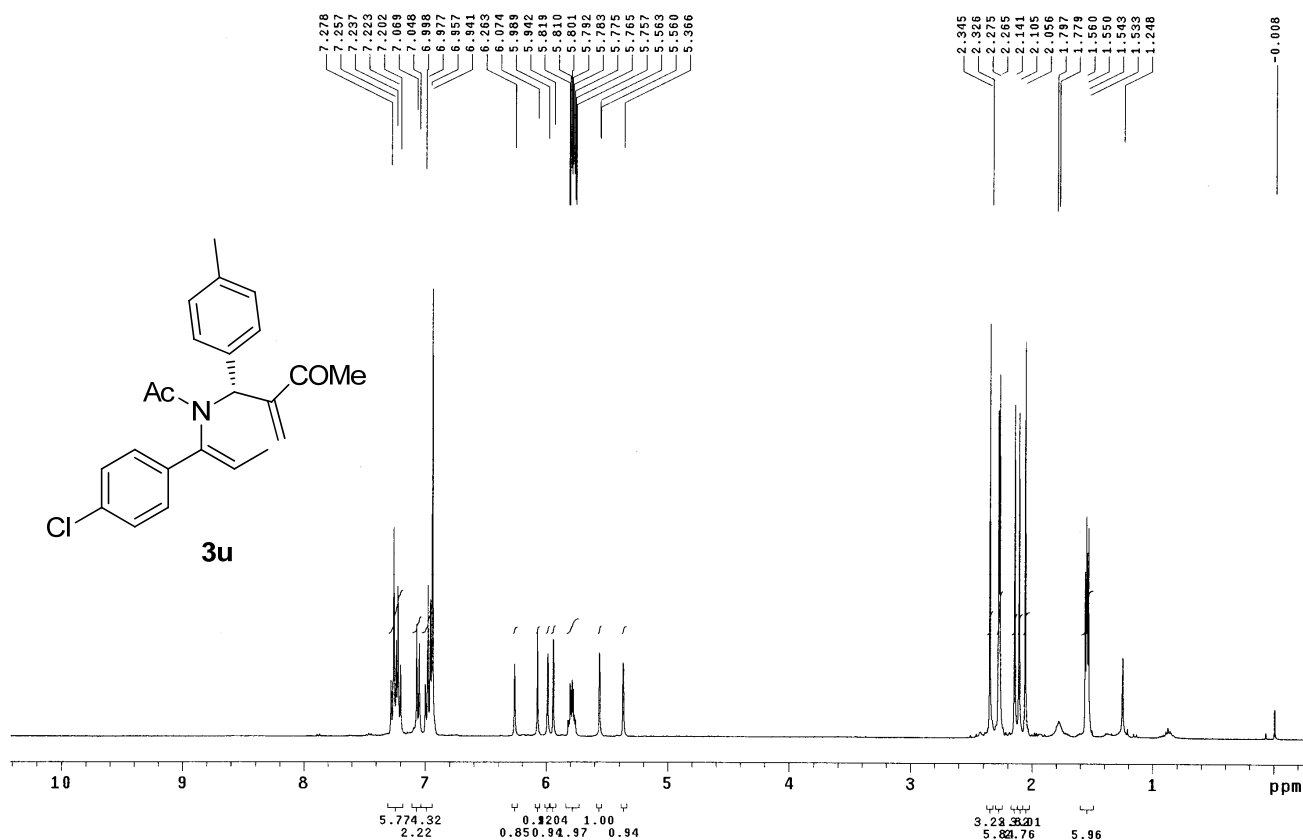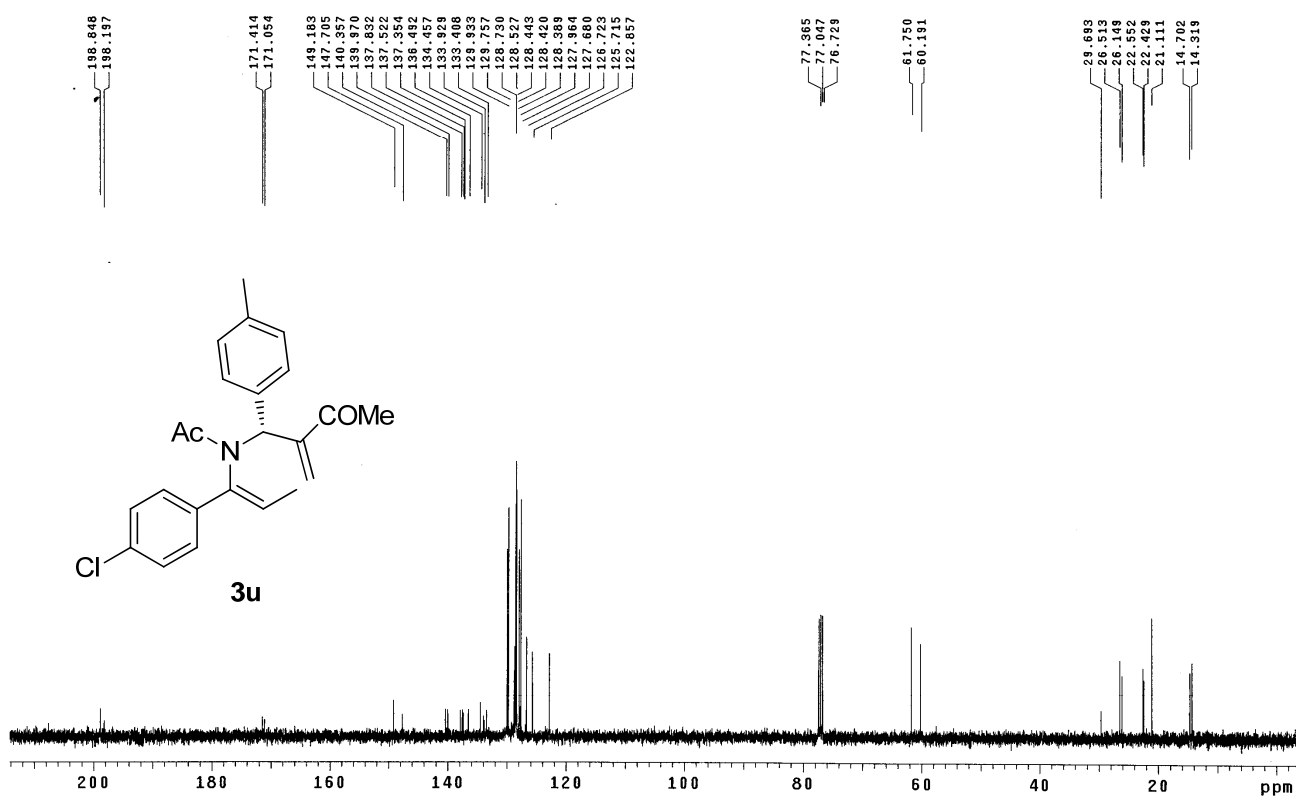

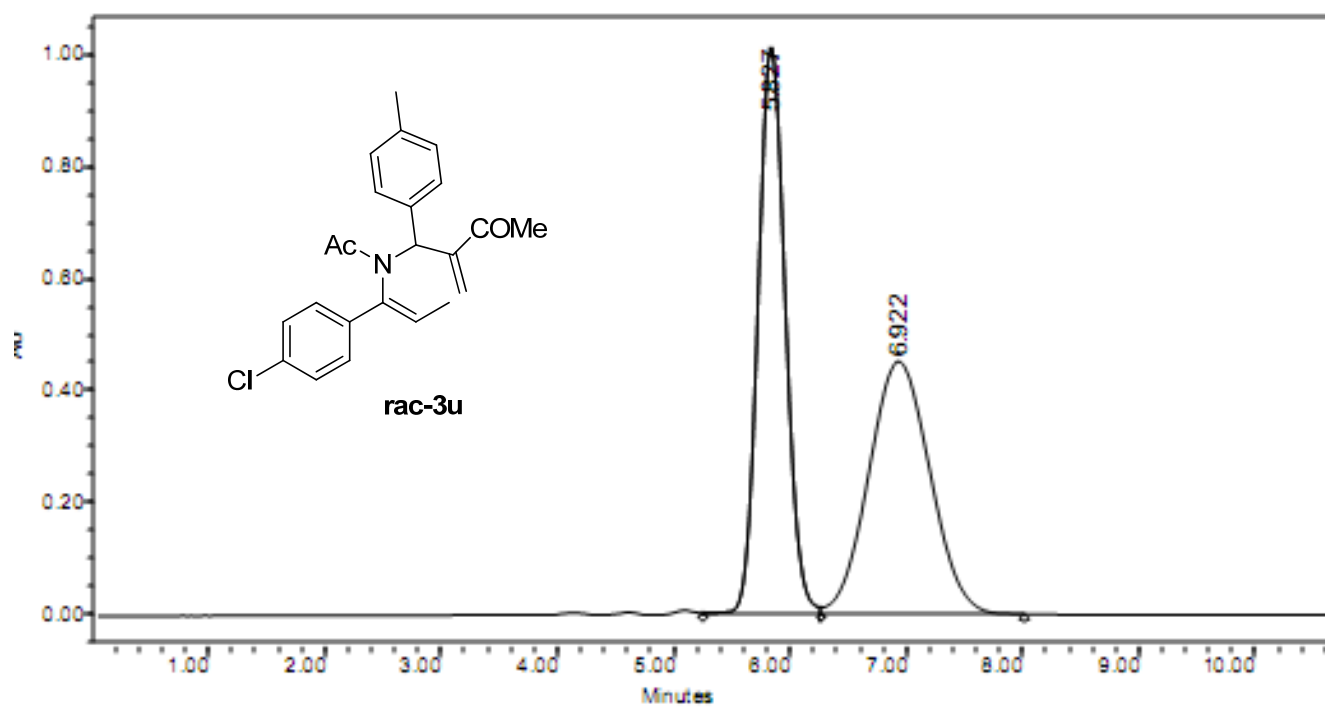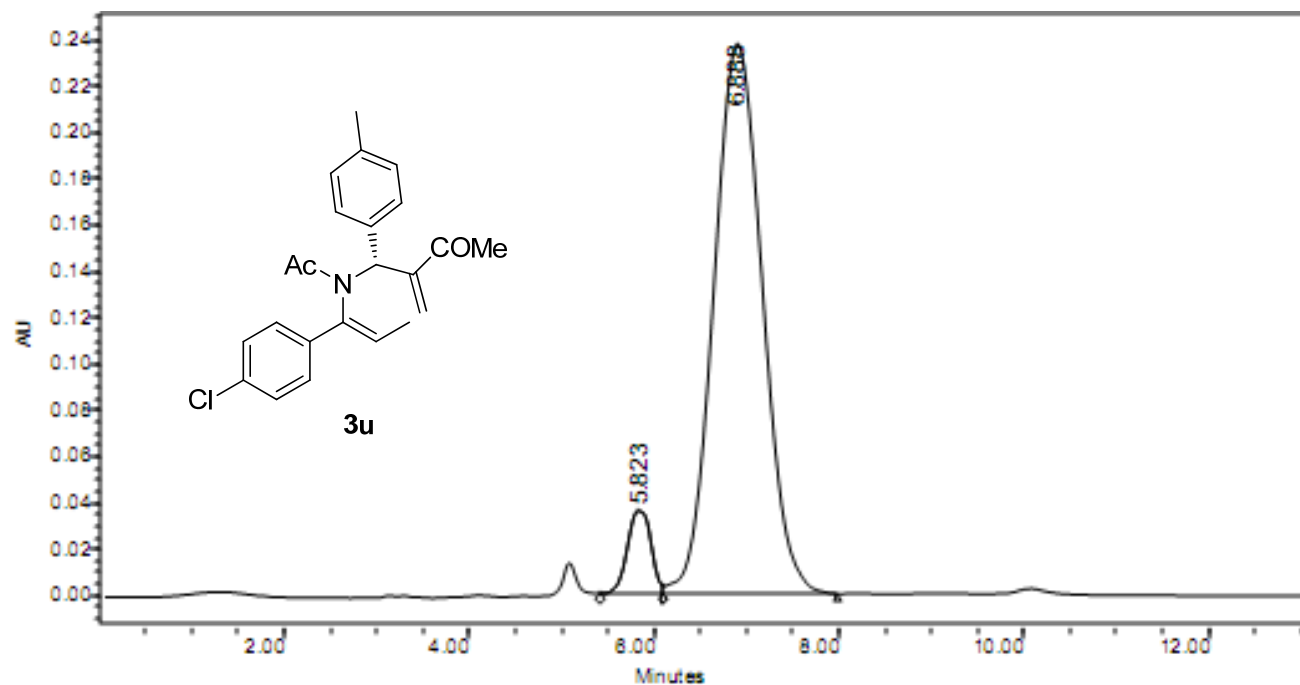

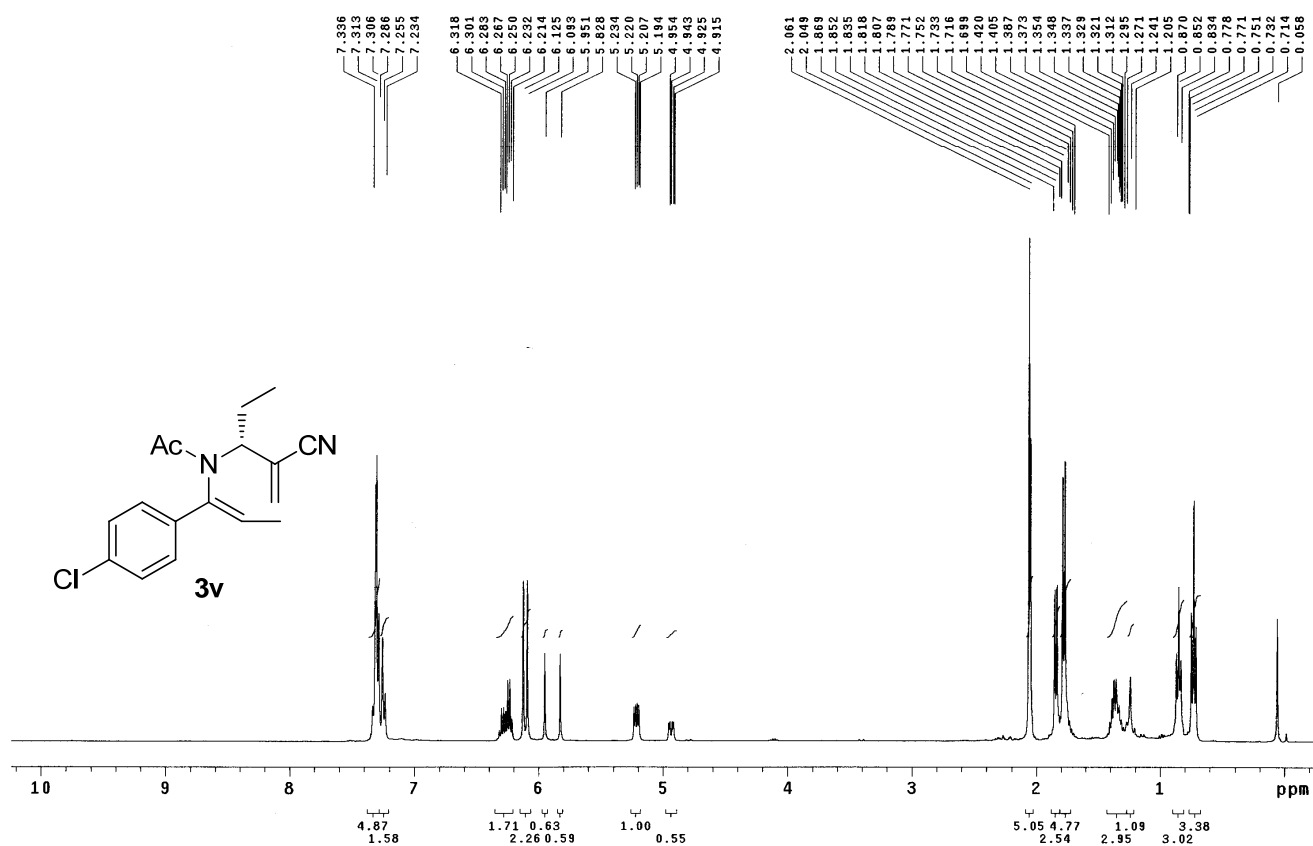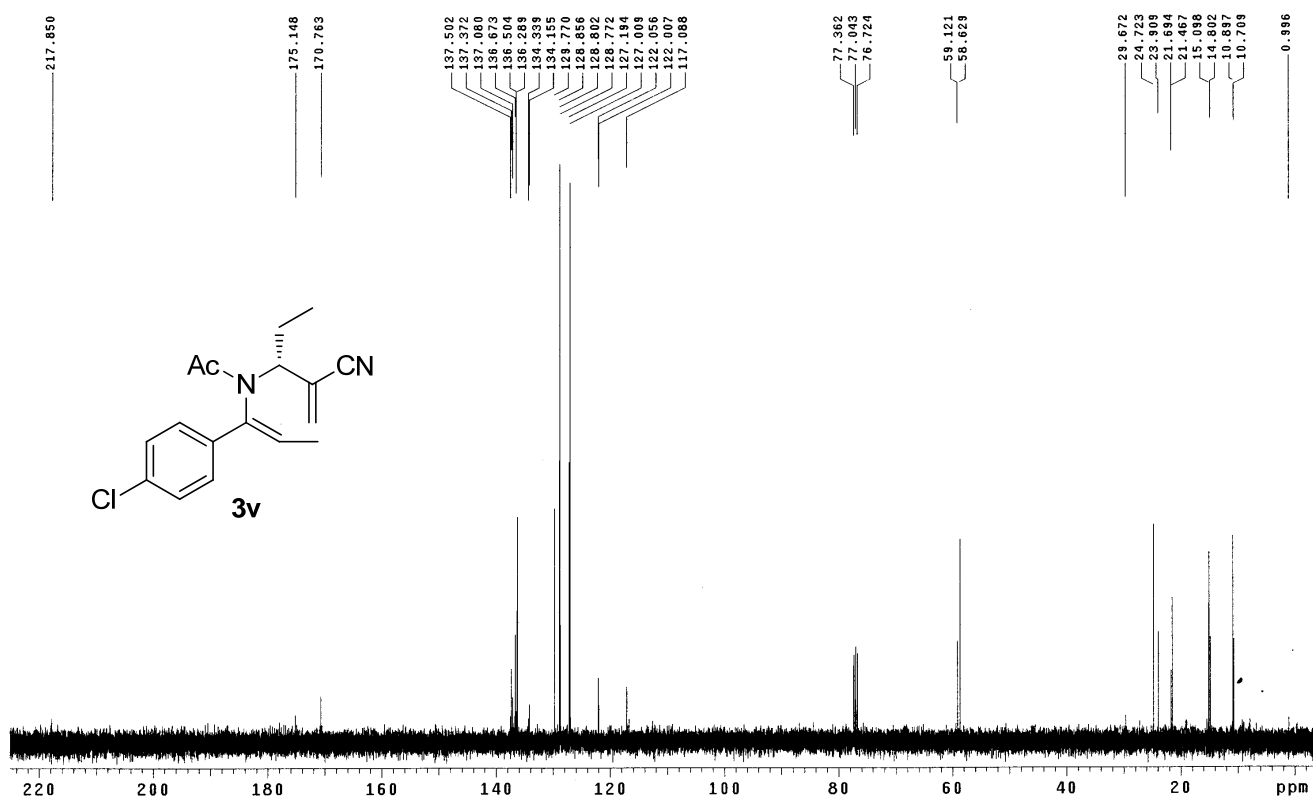

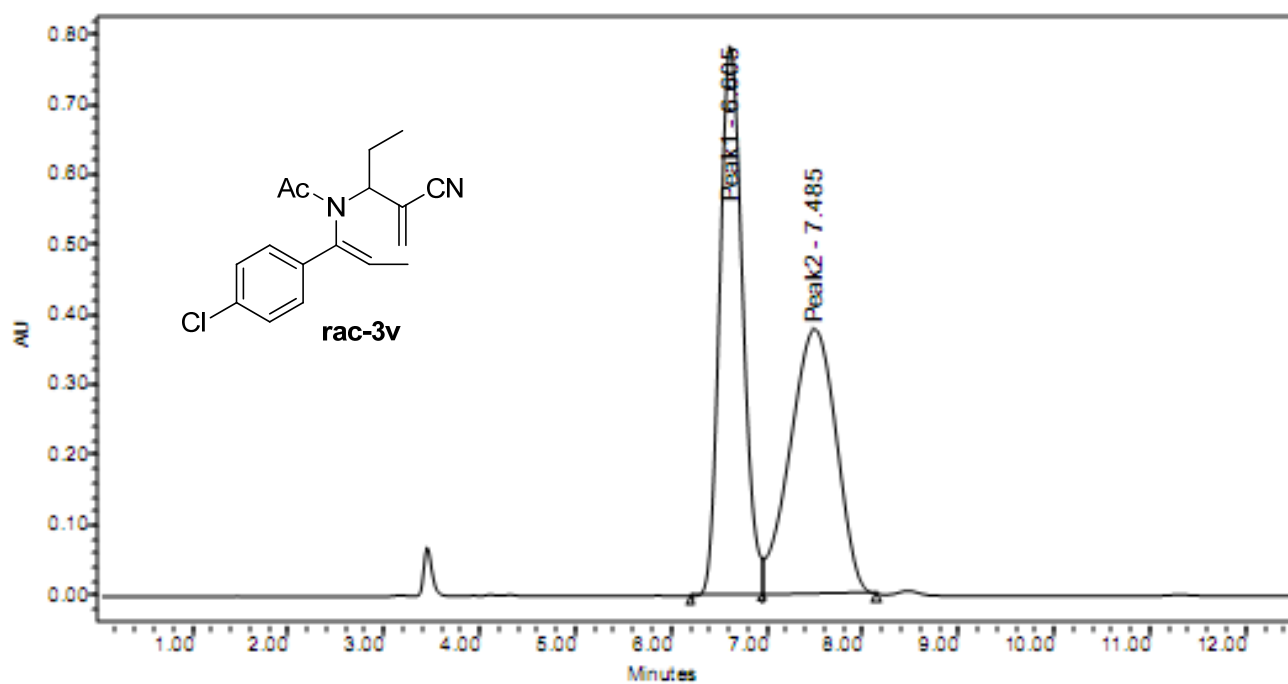

|   | Peak Name | RT (min) | Area ( V *sec) | % Area | Height ( V ) | % Height |
|---|-----------|----------|----------------|--------|--------------|----------|
| 1 | Peak1     | 6.605    | 13062983       | 50.60  | 784433       | 67.41    |
| 2 | Peak2     | 7.485    | 12753668       | 49.40  | 379273       | 32.59    |

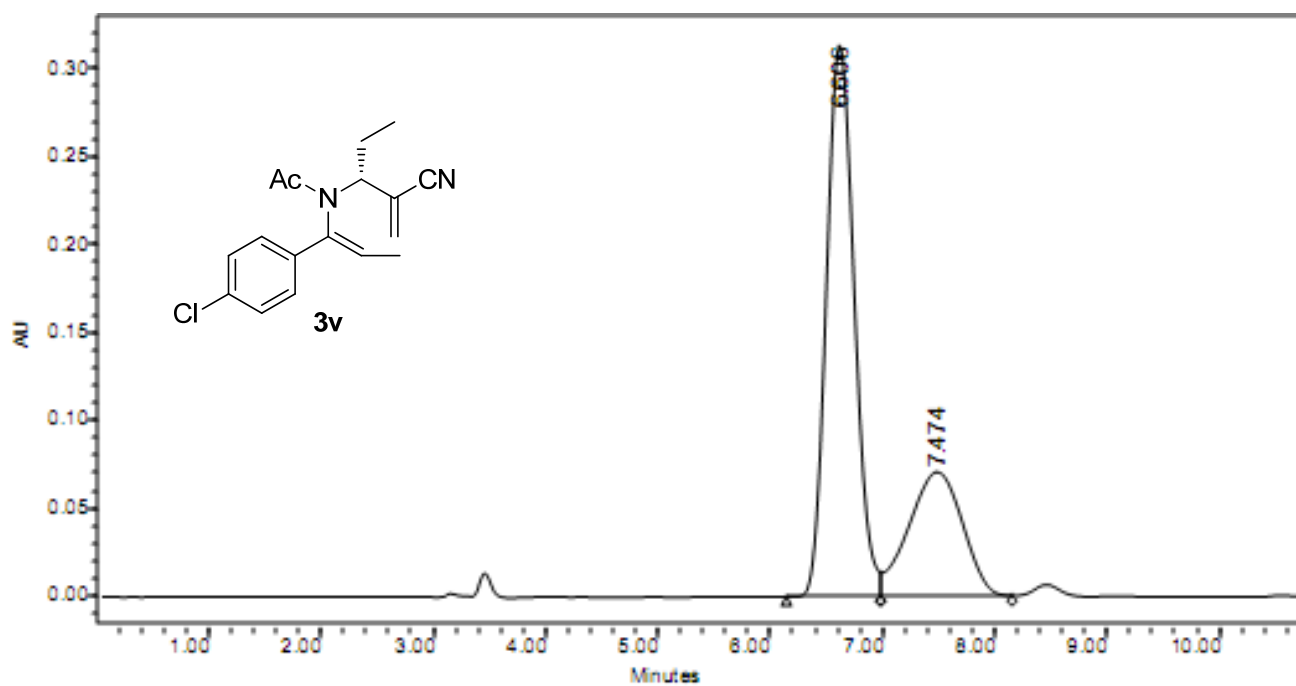

|   | RT (min) | Area ( V *sec) | % Area | Height ( V ) | % Height |
|---|----------|----------------|--------|--------------|----------|
| 1 | 6.606    | 5409835        | 69.42  | 314090       | 81.53    |
| 2 | 7.474    | 2383337        | 30.58  | 71137        | 18.47    |

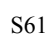

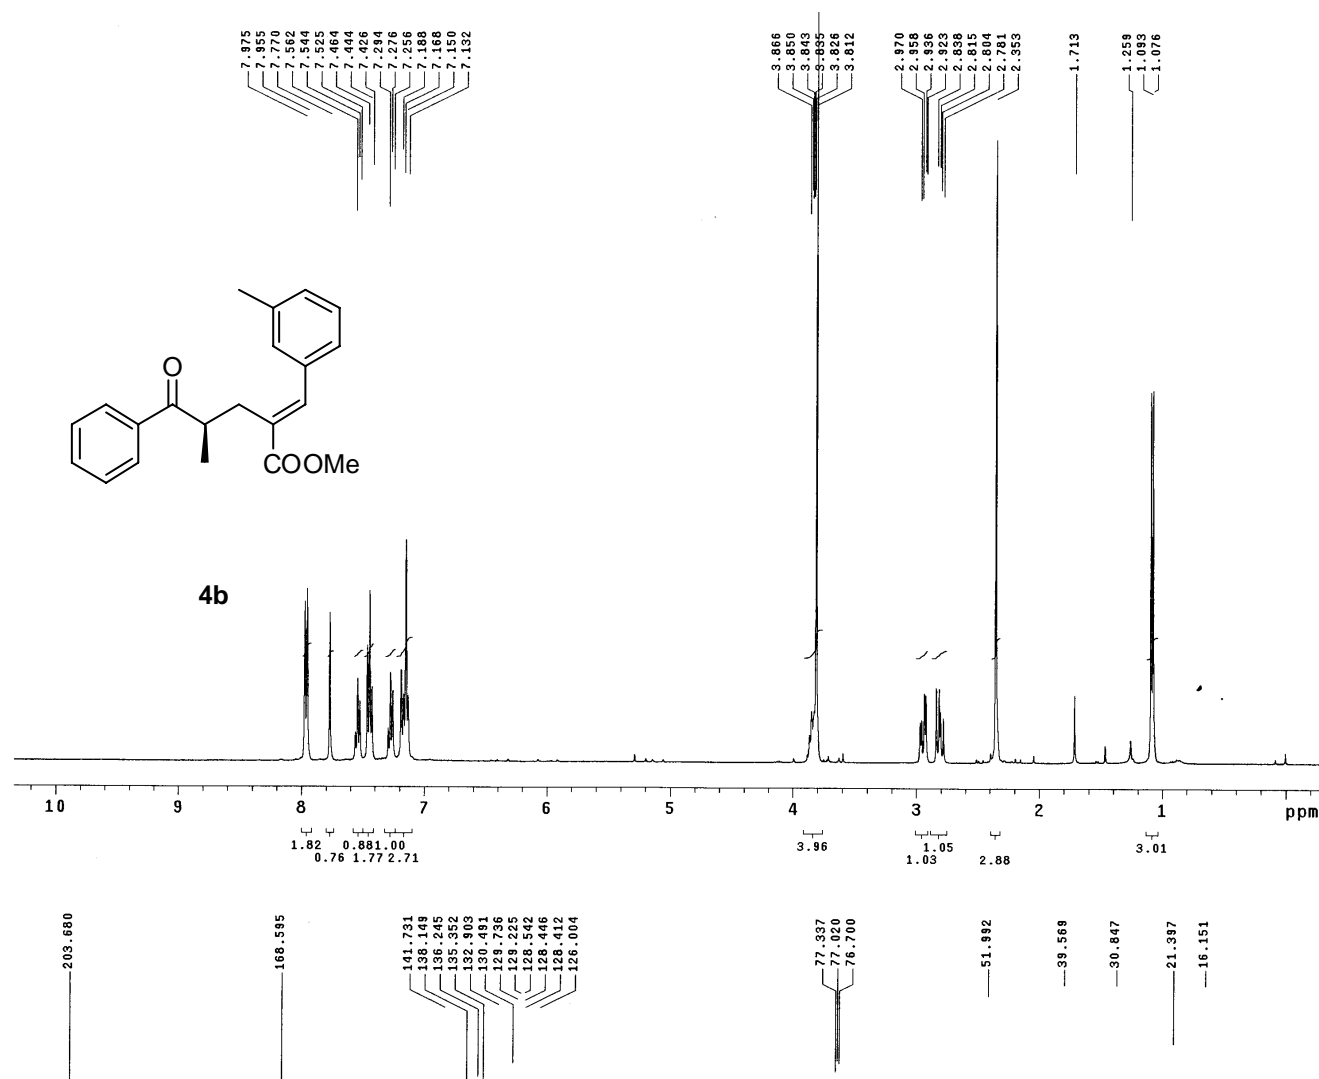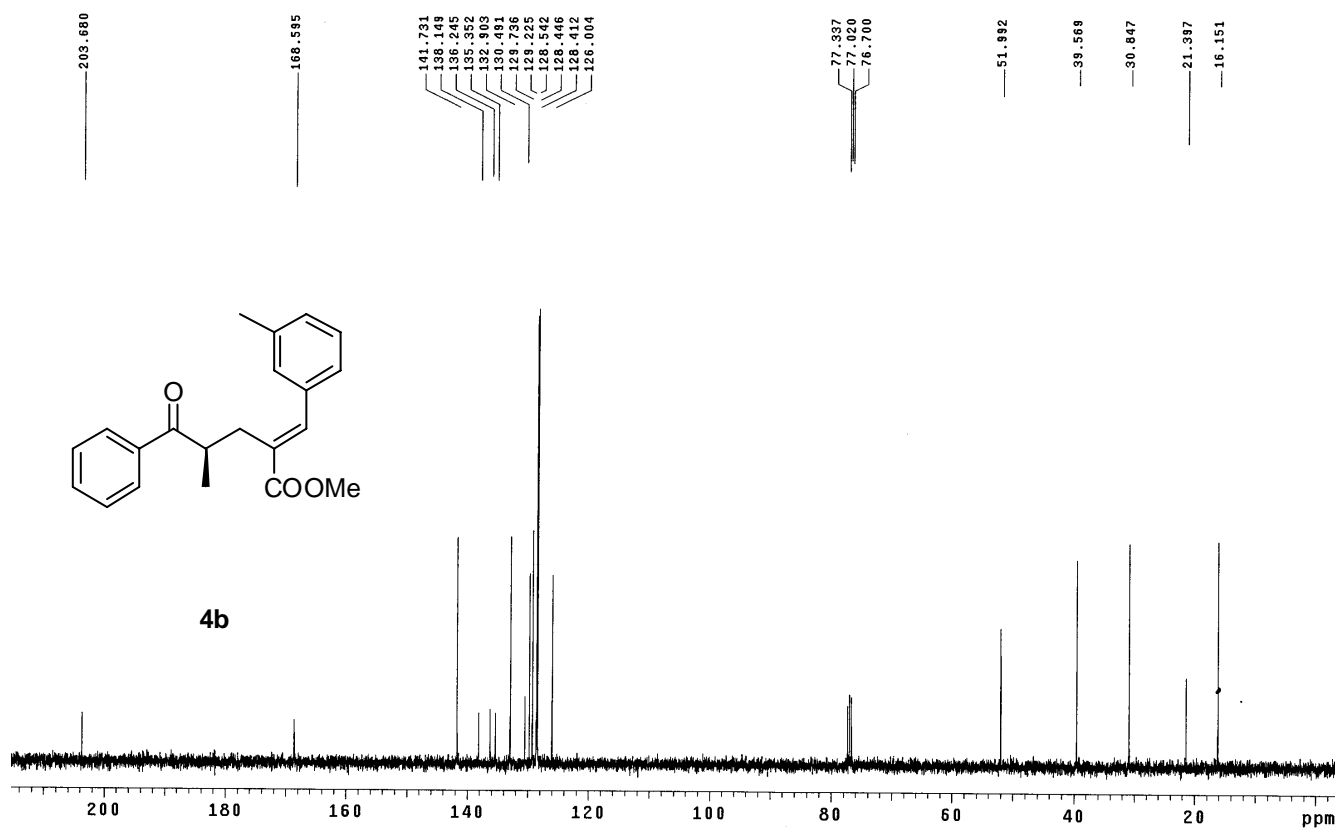

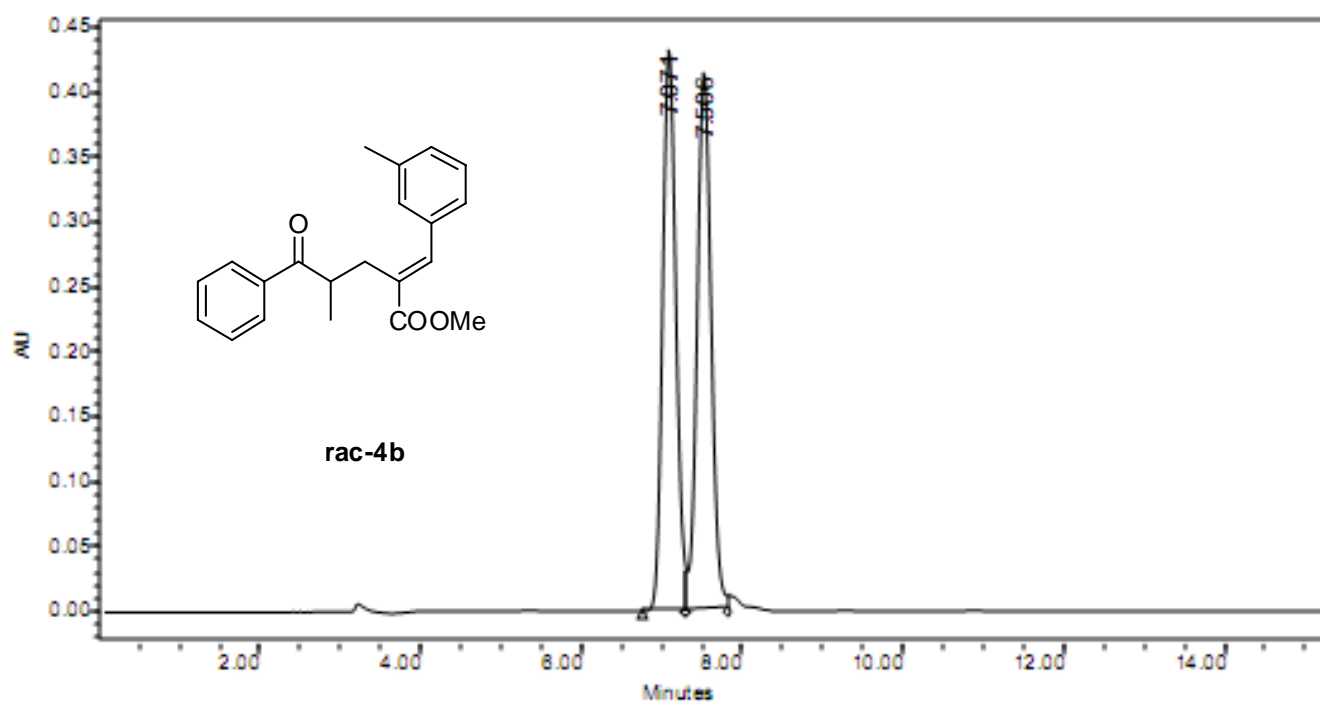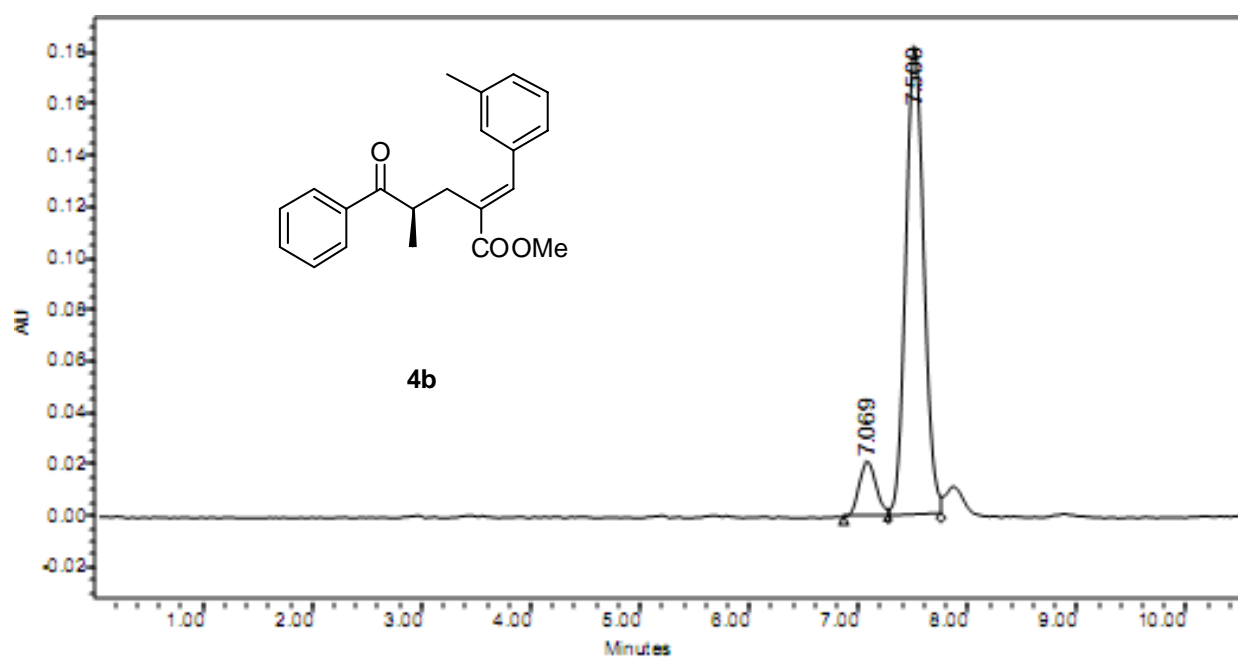

COC(=O)/C=C/[C@H](C)C(=O)c1ccc(Cl)cc1

**4c**

<sup>1</sup>H NMR spectrum (CDCl<sub>3</sub>) of compound **4c**. The spectrum shows aromatic signals between 7.2 and 7.9 ppm, a vinyl proton at 3.82 ppm, a methoxy singlet at 3.78 ppm, a methine doublet at 2.78 ppm, and aliphatic signals at 1.25 and 1.05 ppm. Integration values are provided below the baseline.

| Chemical Shift (ppm) | Integration |
|----------------------|-------------|
| 7.953                | 3.38        |
| 7.931                | 1.25        |
| 7.919                | 4.62        |
| 7.902                | 5.93        |
| 7.887                |             |
| 7.801                |             |
| 7.750                |             |
| 7.428                |             |
| 7.422                |             |
| 7.417                |             |
| 7.405                |             |
| 7.400                |             |
| 7.395                |             |
| 7.387                |             |
| 7.364                |             |
| 7.363                |             |
| 7.355                |             |
| 7.348                |             |
| 7.337                |             |
| 7.328                |             |
| 7.311                |             |
| 7.263                |             |
| 3.821                | 4.98        |
| 3.800                | 0.49        |
| 3.798                | 1.87        |
| 3.791                |             |
| 3.783                |             |
| 3.778                |             |
| 3.773                |             |
| 3.760                |             |
| 3.621                |             |
| 2.944                |             |
| 2.931                | 1.05        |
| 2.903                | 0.72        |
| 2.897                | 0.76        |
| 2.813                |             |
| 2.789                |             |
| 2.778                |             |
| 2.755                |             |
| 1.729                |             |
| 1.245                | 0.61        |
| 1.229                |             |
| 1.067                |             |
| 1.050                | 5.11        |

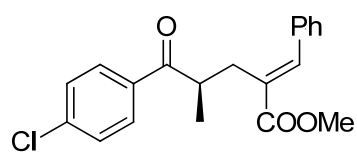COC(=O)/C=C/[C@H](C)C(=O)c1ccc(Cl)cc1

**4c**

141.730  
139.338  
136.721  
135.332  
134.485  
130.721  
129.897  
128.927  
128.970  
128.863  
128.597  
128.489  
128.105  
127.952  
127.952  
77.363  
77.049  
76.732  
52.076  
39.565  
39.356  
30.838  
17.060  
15.873



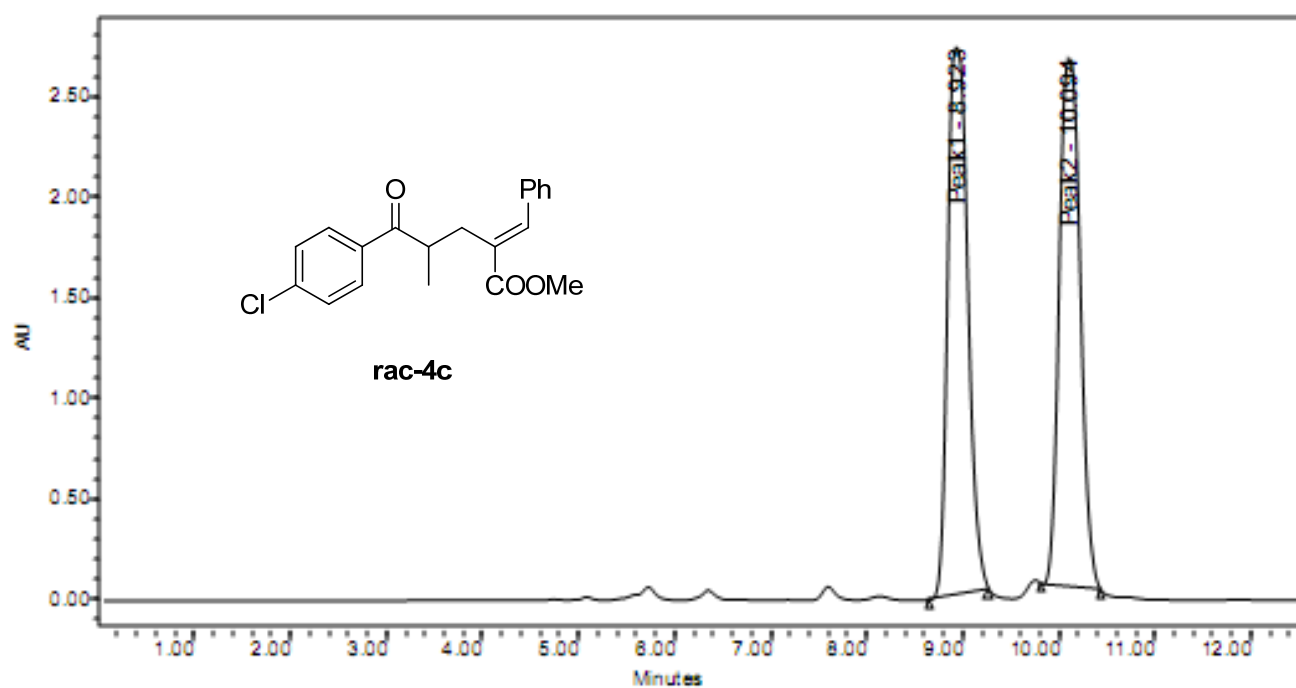

|   | Peak Name | RT (min) | Area (V*sec) | % Area | Height (V) | % Height |
|---|-----------|----------|--------------|--------|------------|----------|
| 1 | Peak1     | 8.923    | 39877019     | 50.07  | 2728467    | 50.93    |
| 2 | Peak2     | 10.094   | 39770637     | 49.93  | 2628932    | 49.07    |

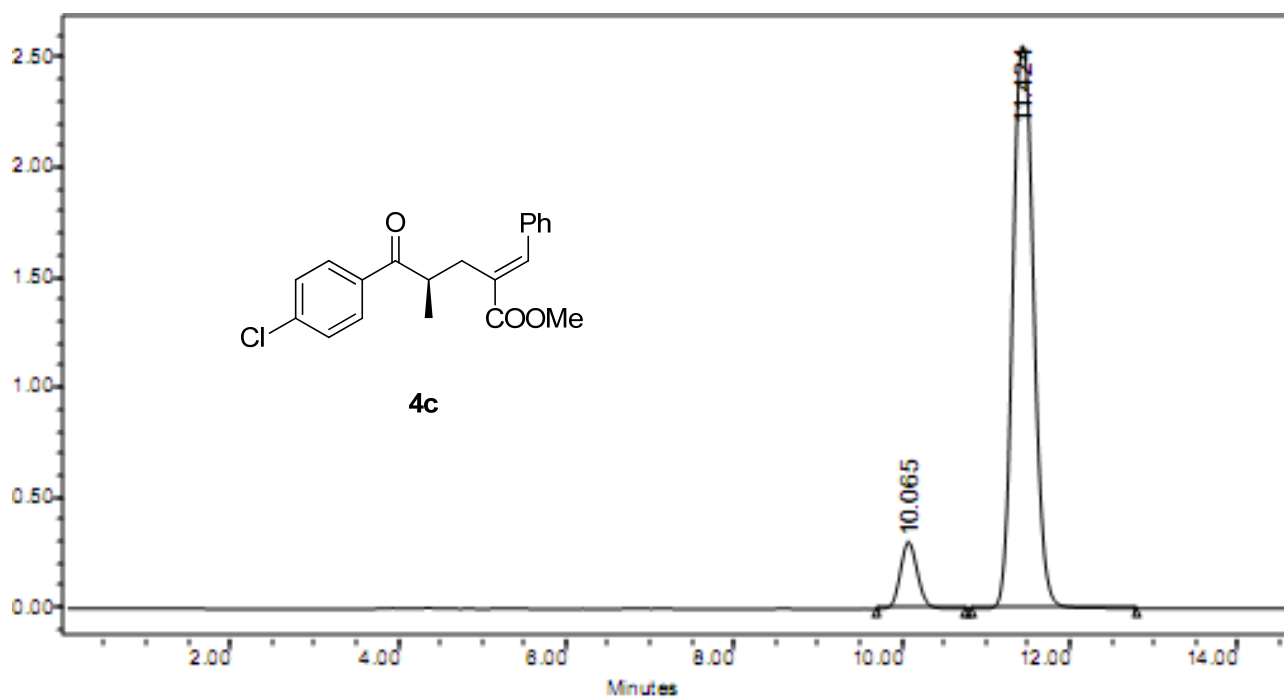

|   | RT (min) | Area (V*sec) | % Area | Height (V) | % Height |
|---|----------|--------------|--------|------------|----------|
| 1 | 10.065   | 4290031      | 8.84   | 302310     | 10.56    |
| 2 | 11.424   | 44237992     | 91.16  | 2559382    | 89.44    |

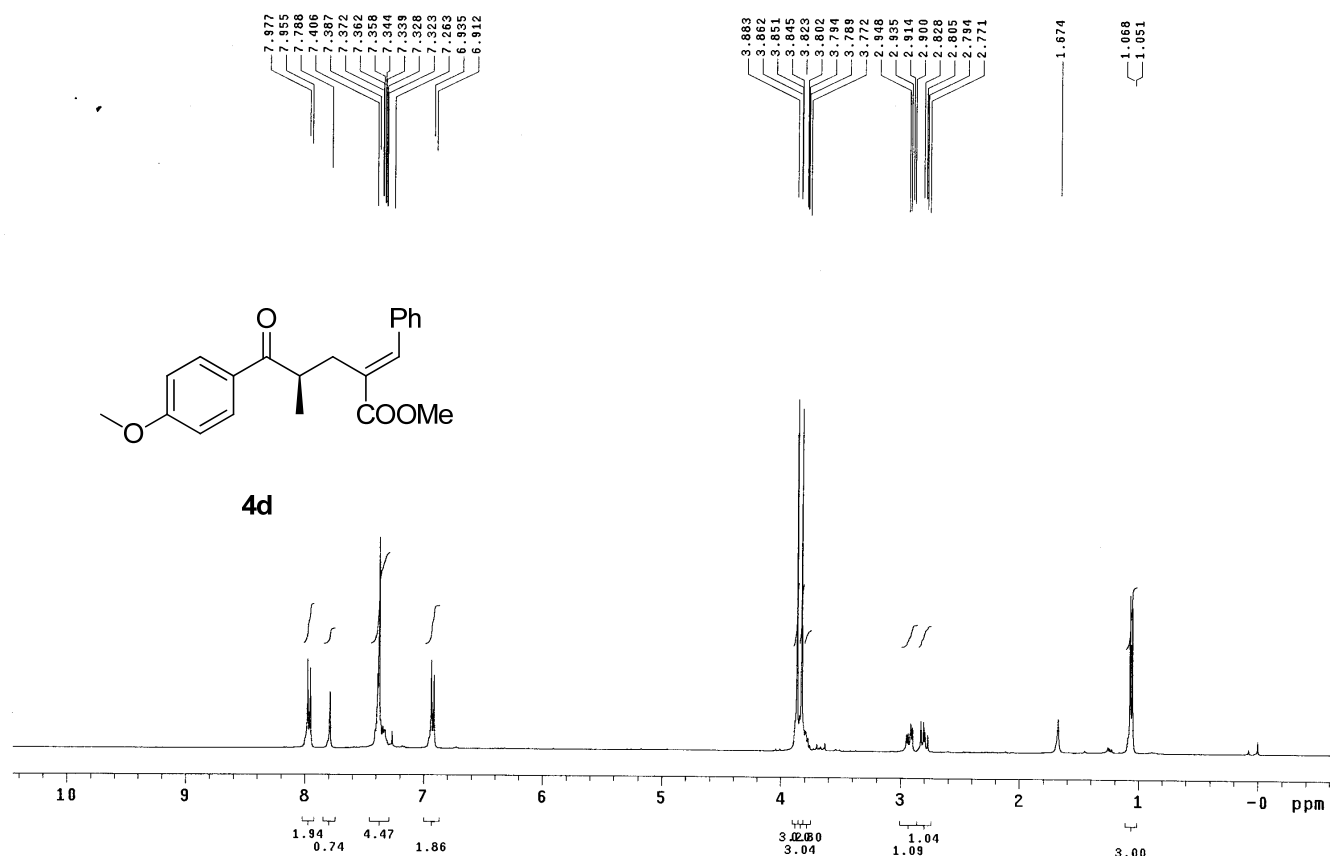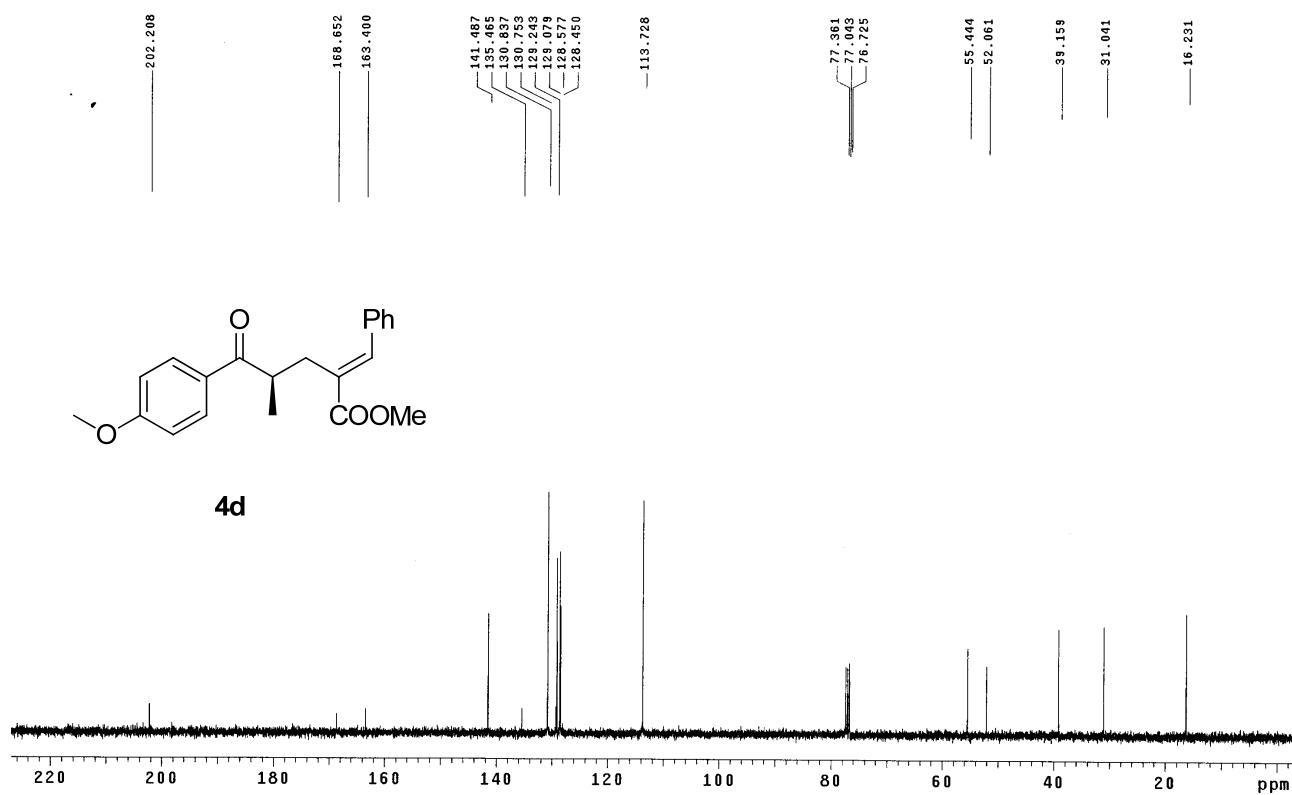

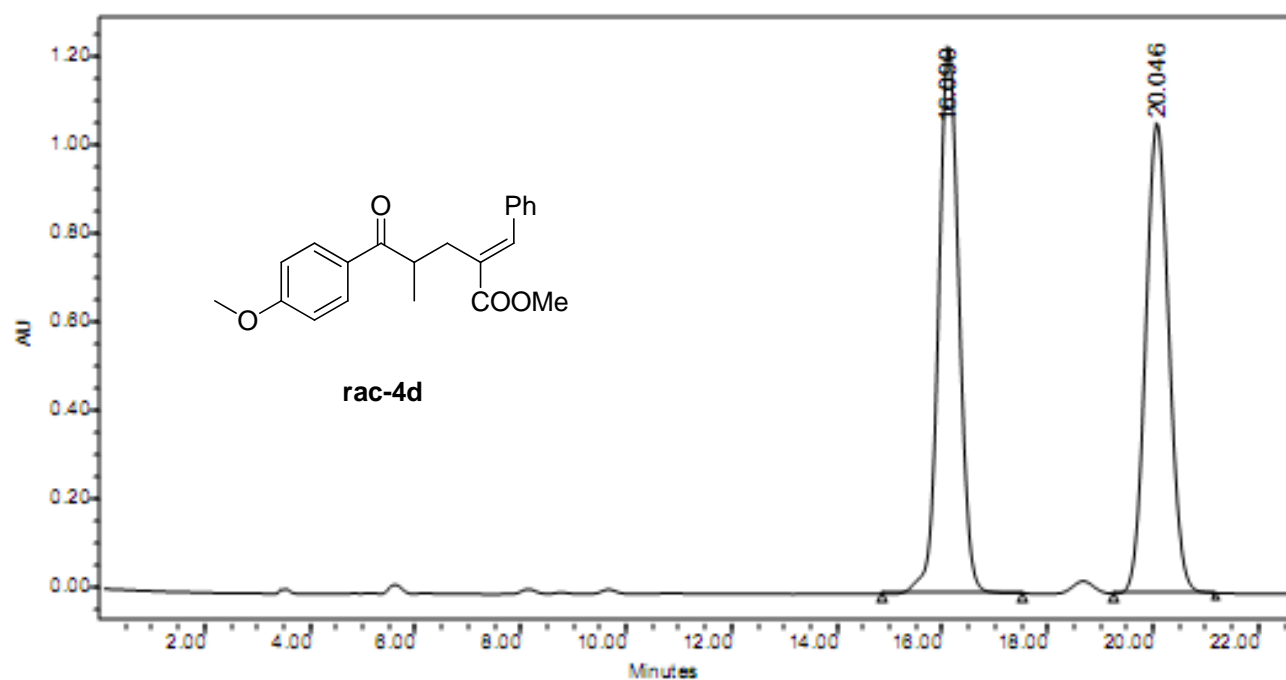

|   | RT<br>(min) | Area<br>(V *sec) | % Area | Height<br>(V) | % Height |
|---|-------------|------------------|--------|---------------|----------|
| 1 | 16.090      | 33391538         | 50.59  | 1235977       | 53.80    |
| 2 | 20.046      | 32606759         | 49.41  | 1061423       | 46.20    |

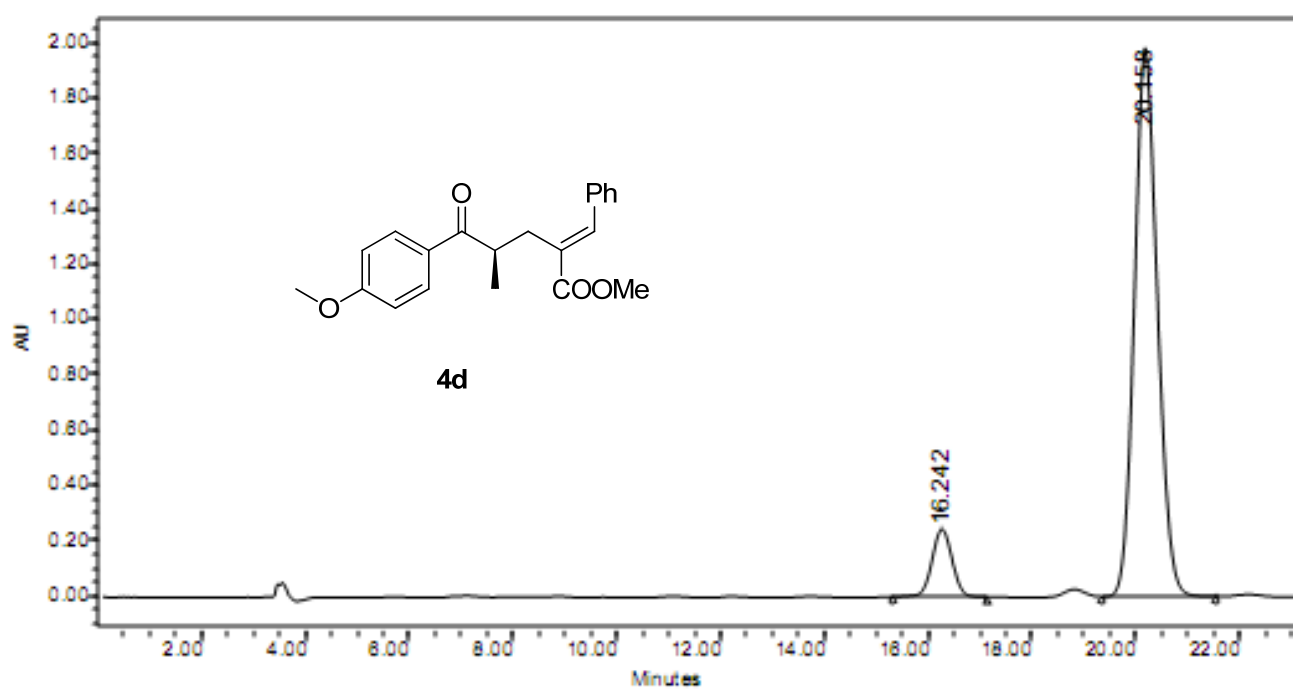

|   | RT<br>(min) | Area<br>(V *sec) | % Area | Height<br>(V) | % Height |
|---|-------------|------------------|--------|---------------|----------|
| 1 | 16.242      | 6640225          | 9.78   | 244365        | 10.96    |
| 2 | 20.158      | 61226339         | 90.22  | 1985217       | 89.04    |

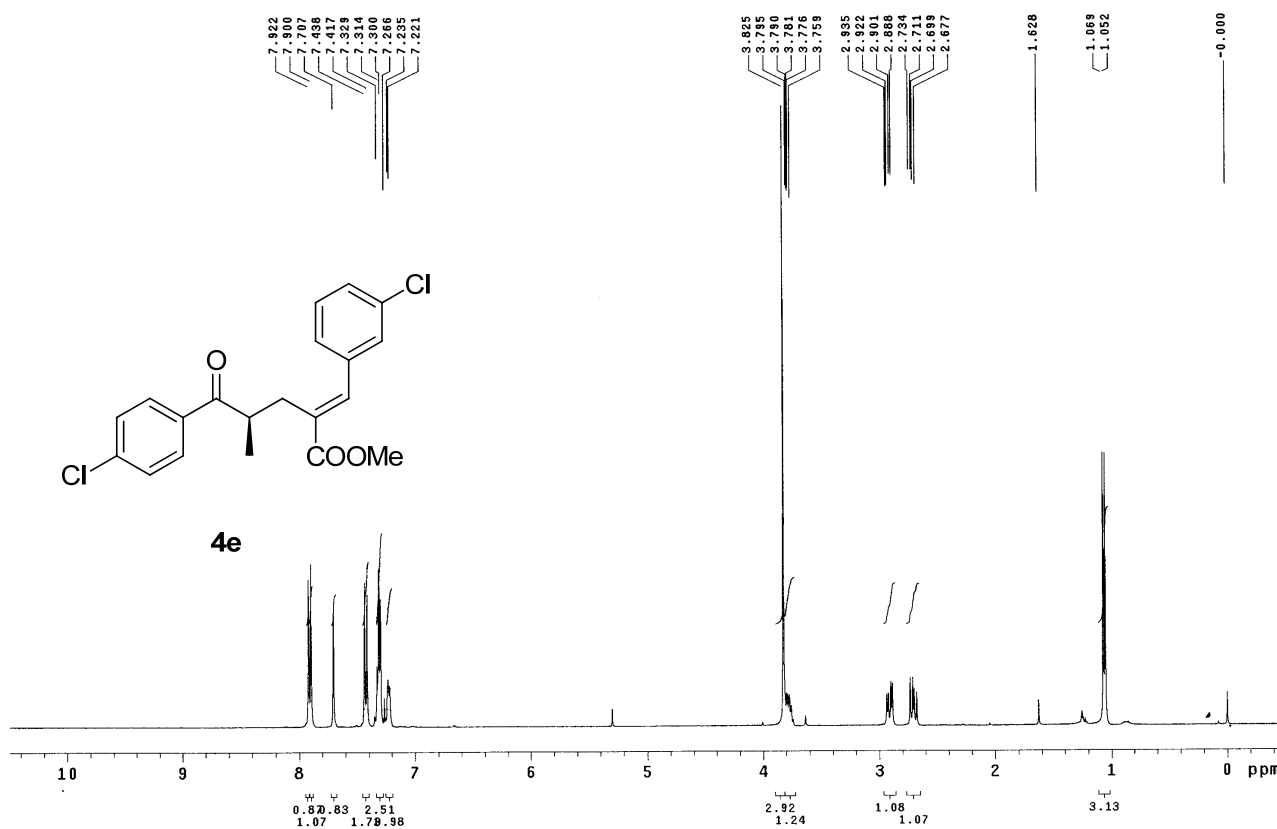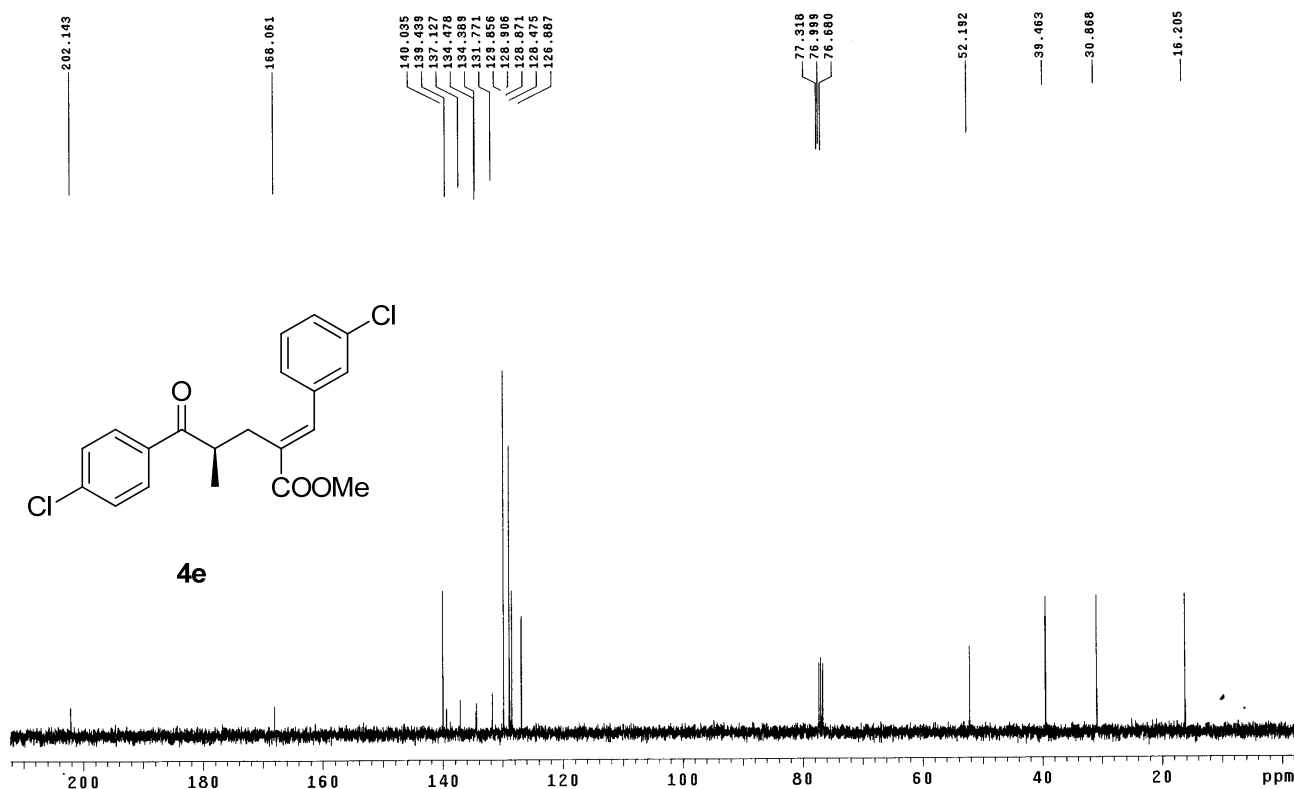

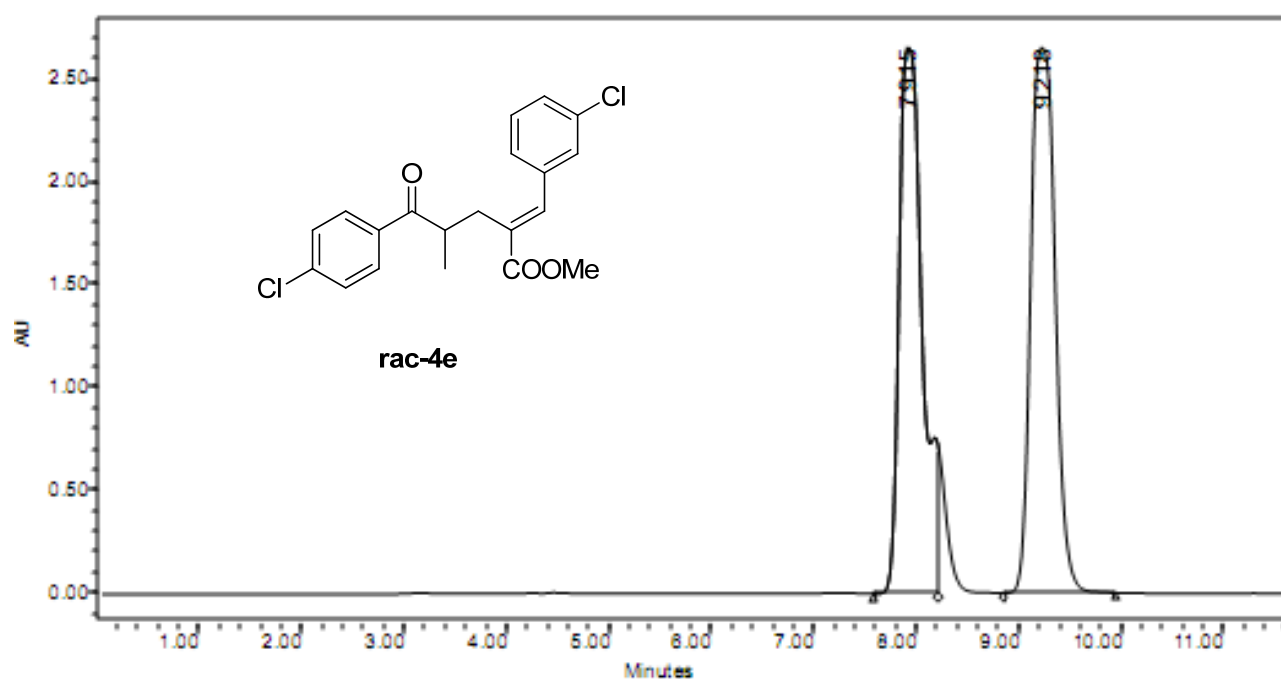

|   | RT<br>(min) | Area<br>( V *sec) | % Area | Height<br>( V ) | % Height |
|---|-------------|-------------------|--------|-----------------|----------|
| 1 | 7.915       | 42367098          | 49.10  | 2654056         | 50.03    |
| 2 | 9.218       | 43919333          | 50.90  | 2651250         | 49.97    |

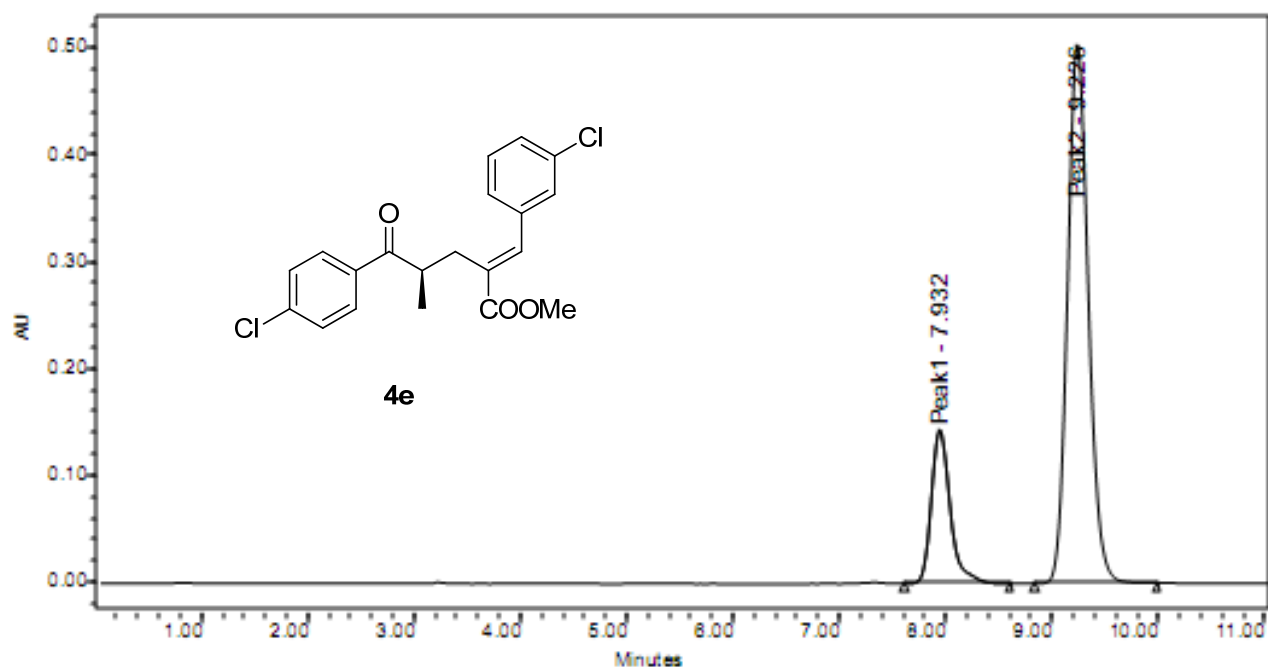

|   | Peak Name | RT<br>(min) | Area<br>( V *sec) | % Area | Height<br>( V ) | % Height |
|---|-----------|-------------|-------------------|--------|-----------------|----------|
| 1 | Peak1     | 7.932       | 1783050           | 20.67  | 143721          | 22.15    |
| 2 | Peak2     | 9.226       | 6843331           | 79.33  | 505151          | 77.85    |

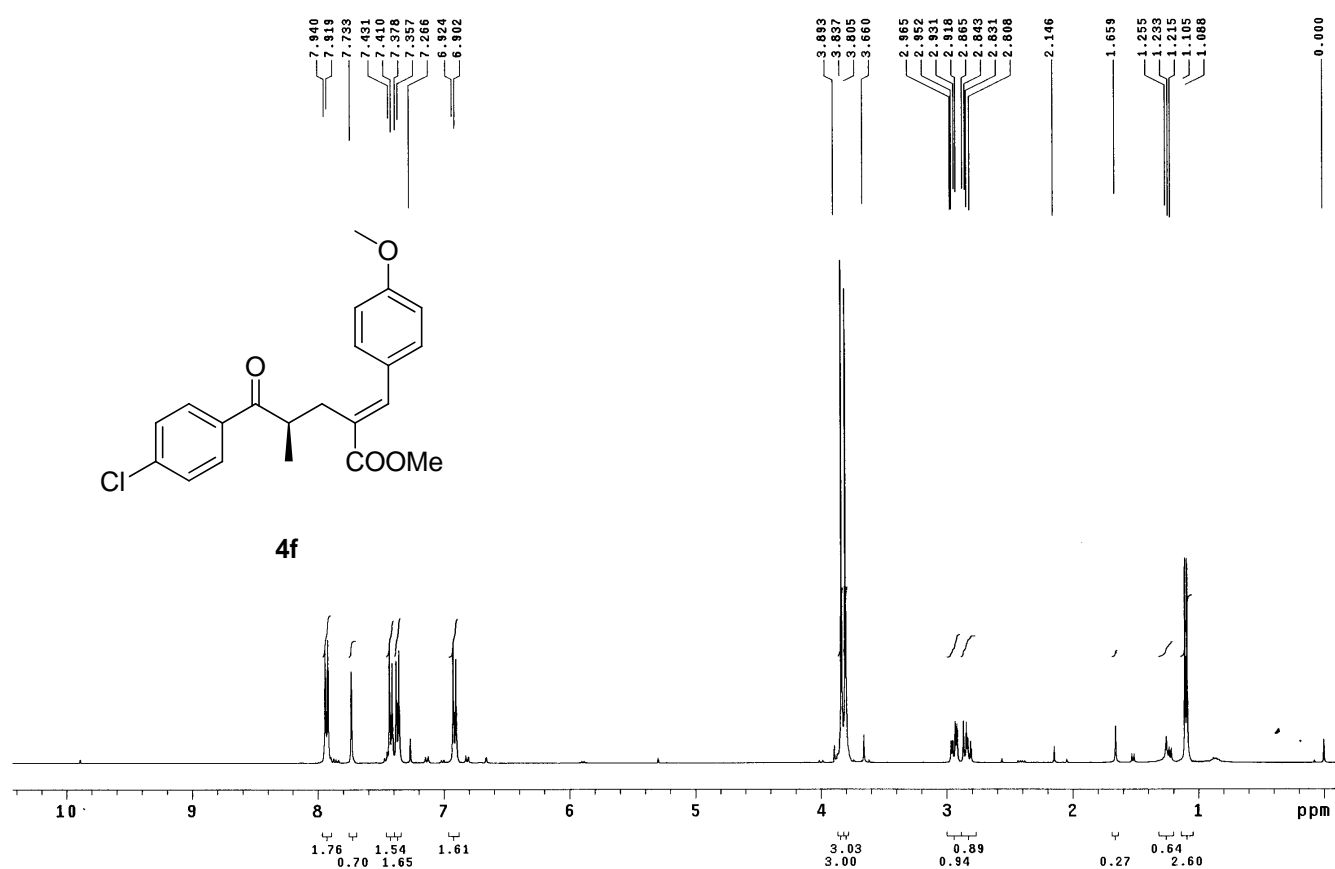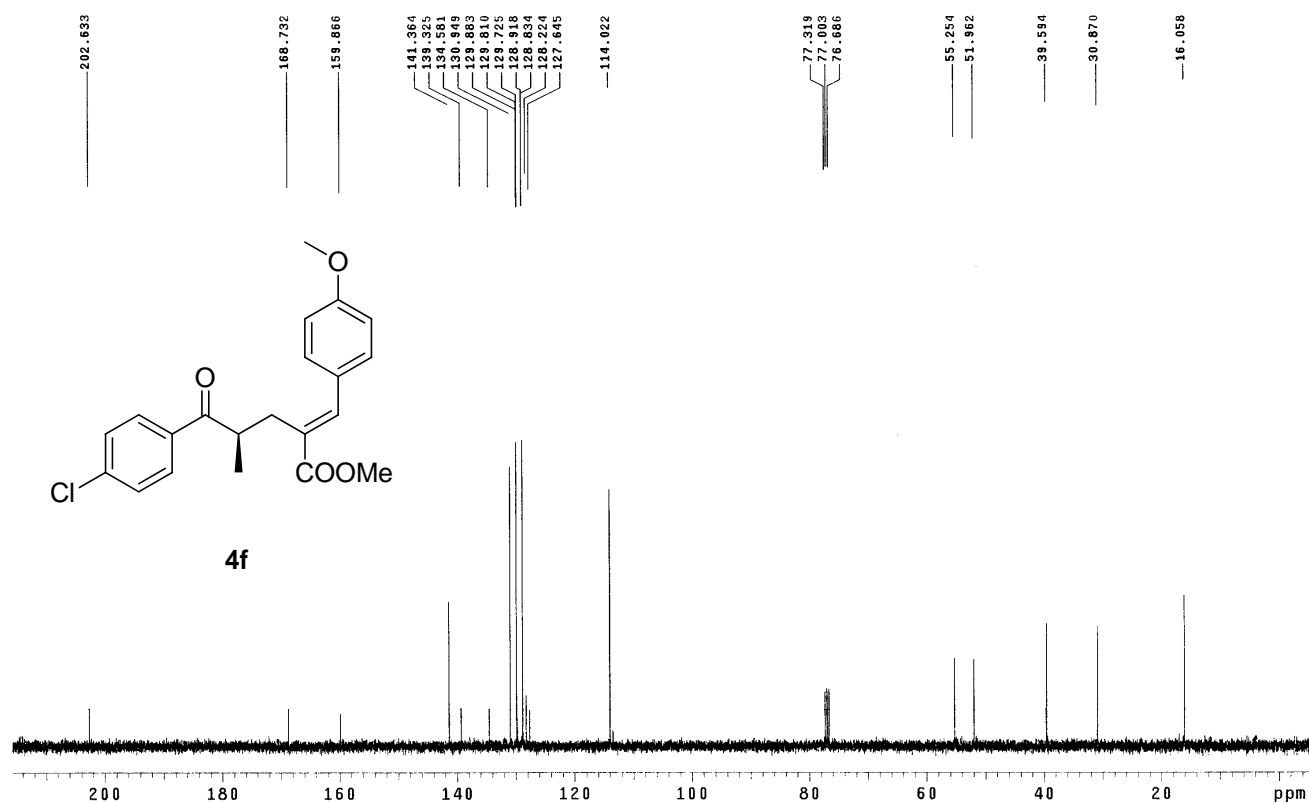

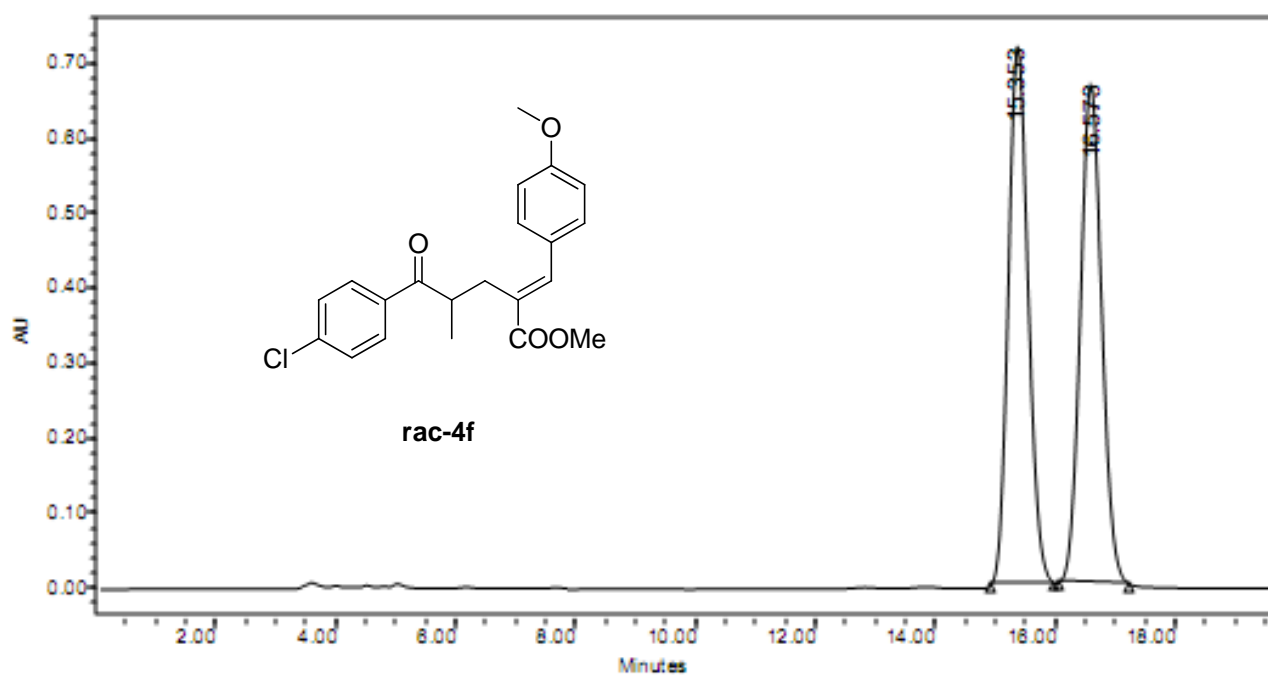

|   | RT<br>(min) | Area<br>( V *sec) | % Area | Height<br>( V ) | %<br>Height |
|---|-------------|-------------------|--------|-----------------|-------------|
| 1 | 15.353      | 16446007          | 50.04  | 716665          | 51.88       |
| 2 | 16.573      | 16421483          | 49.96  | 664619          | 48.12       |

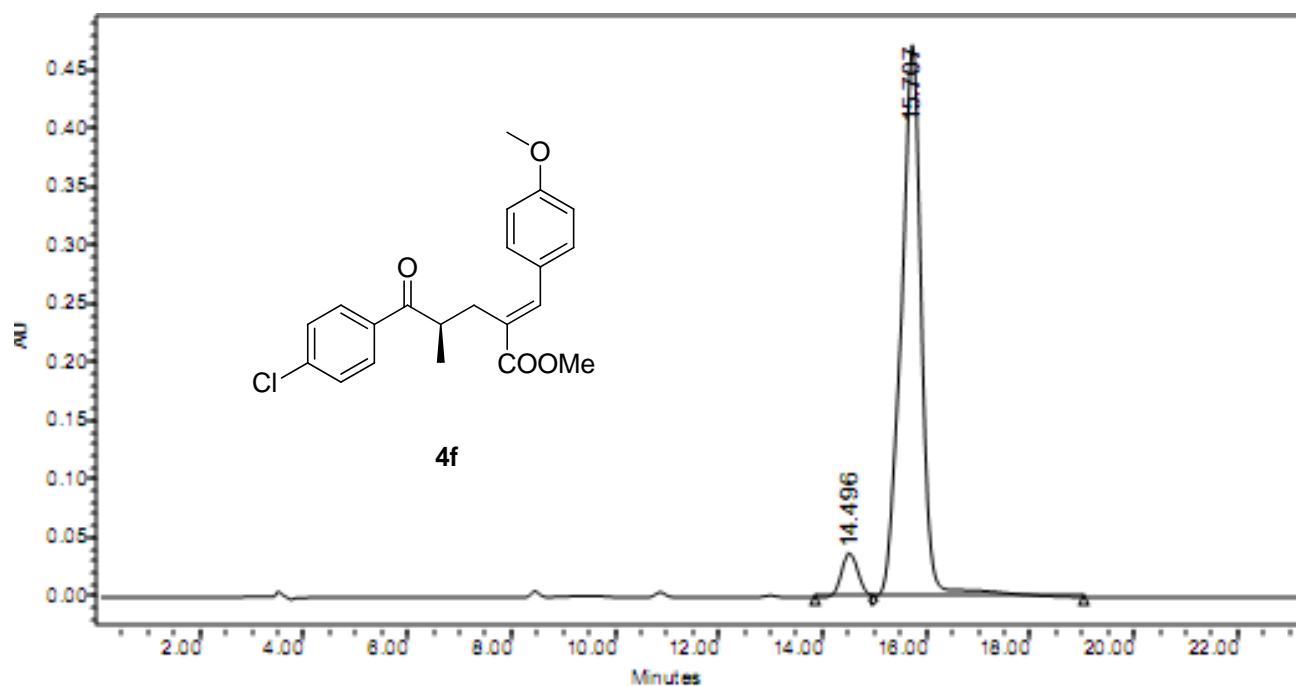

|   | RT<br>(min) | Area<br>( V *sec) | % Area | Height<br>( V ) | %<br>Height |
|---|-------------|-------------------|--------|-----------------|-------------|
| 1 | 14.496      | 655334            | 6.16   | 37219           | 7.30        |
| 2 | 15.707      | 13031976          | 93.84  | 472561          | 92.70       |

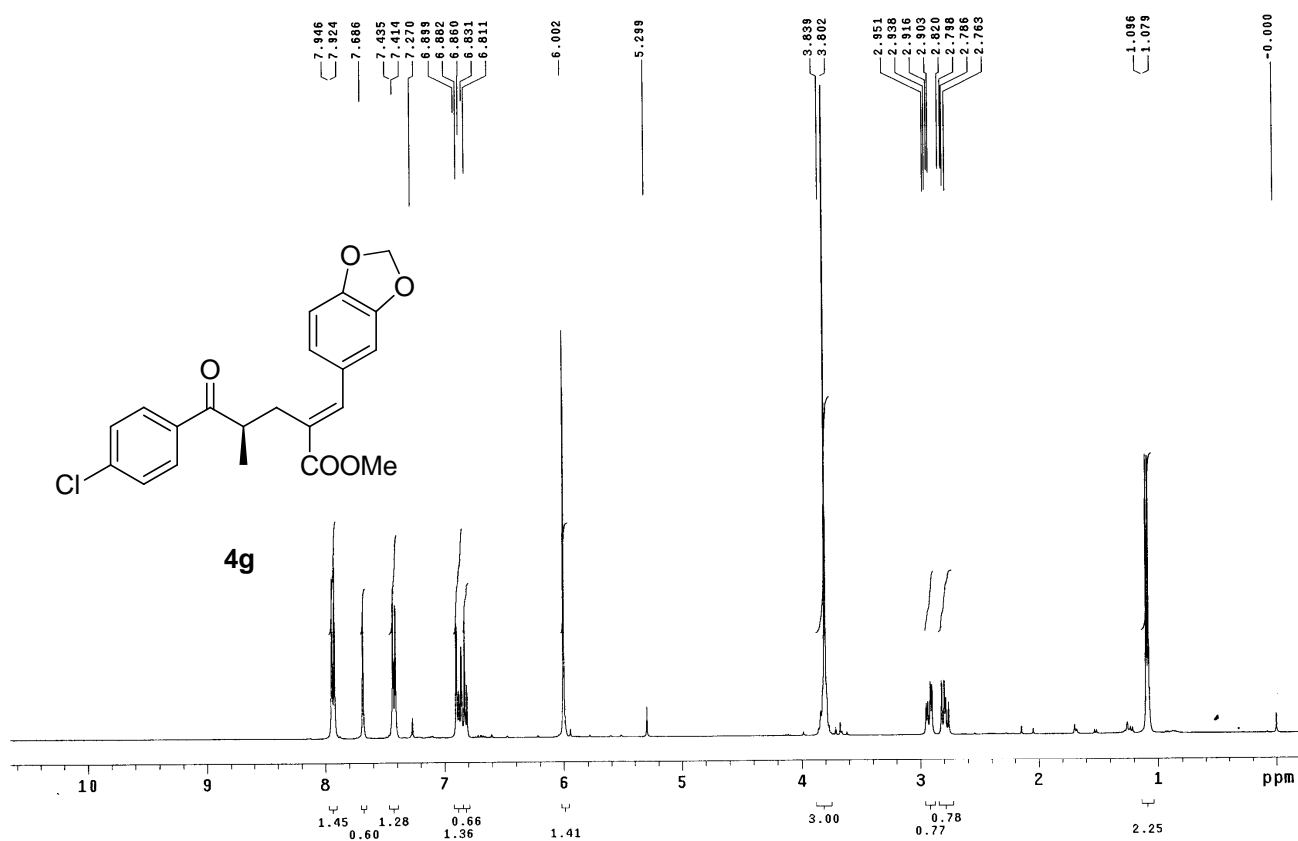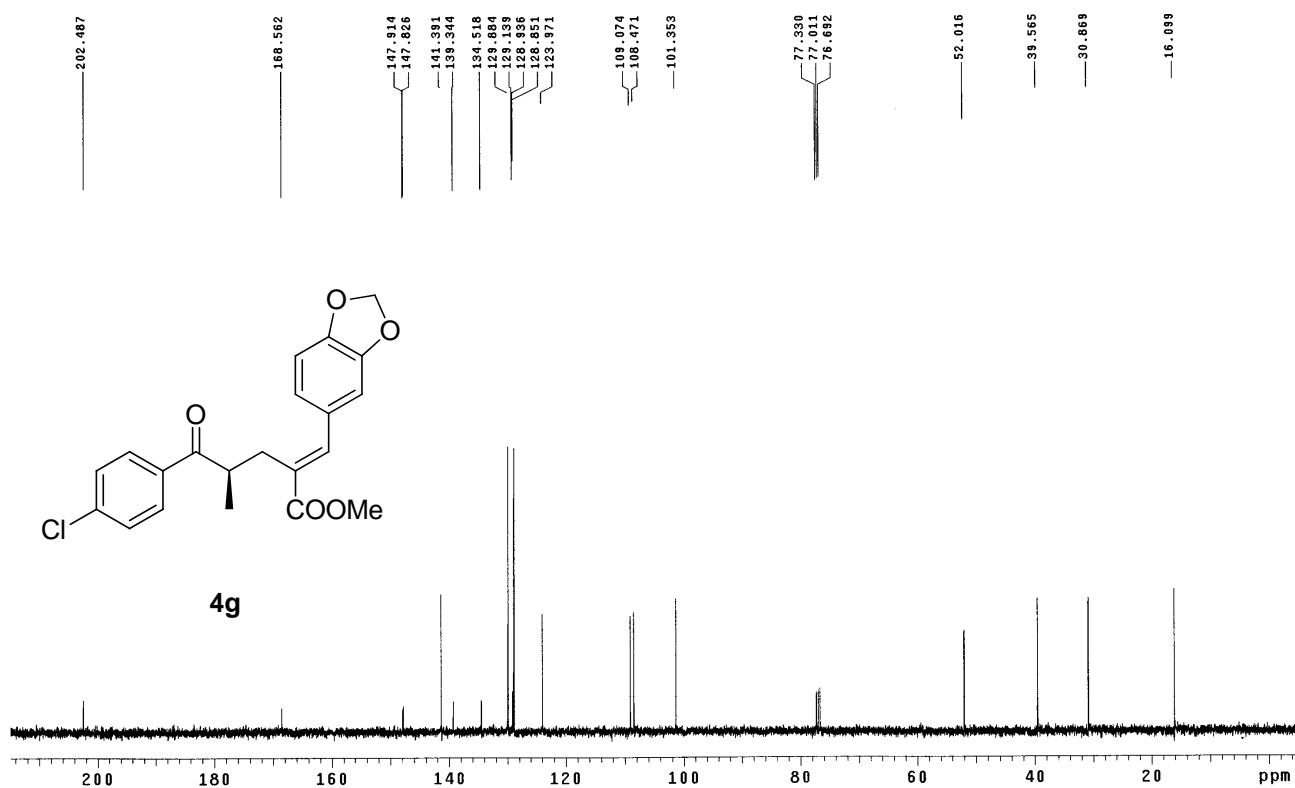



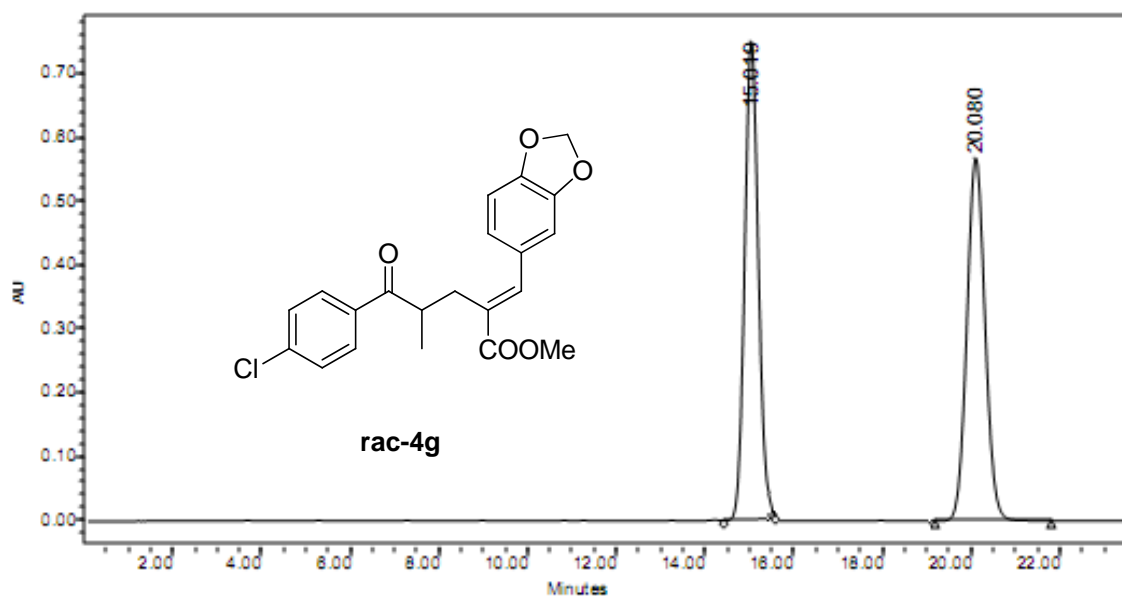

|   | RT<br>(min) | Area<br>(V *sec) | % Area | Height<br>(V) | % Height |
|---|-------------|------------------|--------|---------------|----------|
| 1 | 15.019      | 16130745         | 49.87  | 751785        | 56.93    |
| 2 | 20.080      | 16214630         | 50.13  | 568743        | 43.07    |

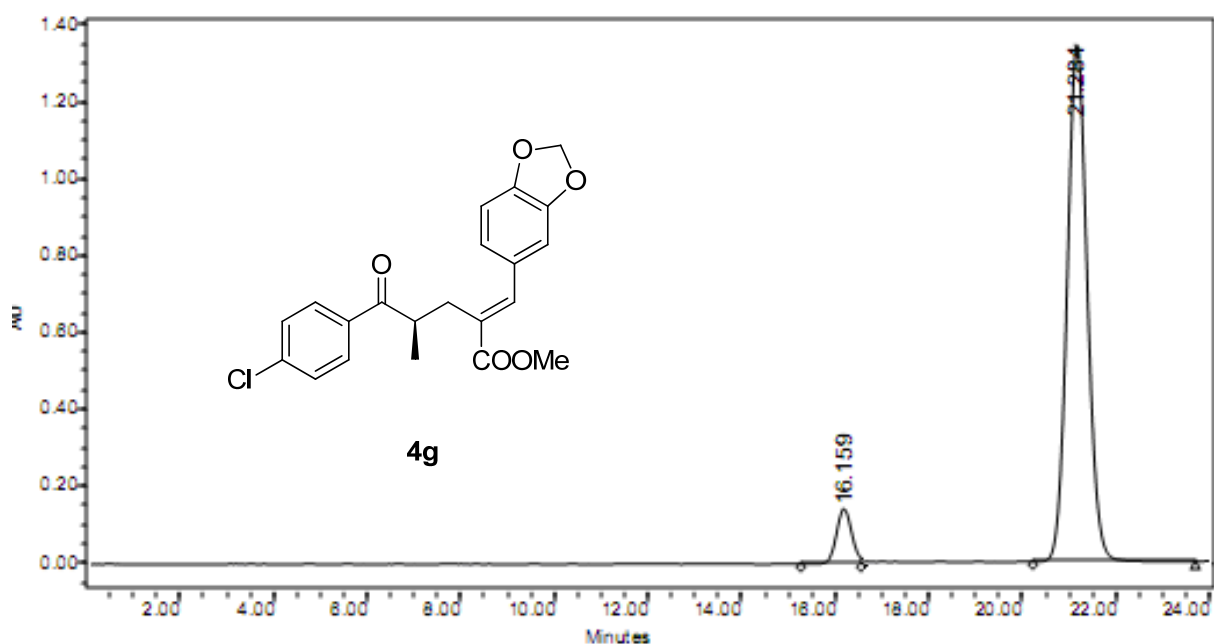

|   | RT<br>(min) | Area<br>(V *sec) | % Area | Height<br>(V) | % Height |
|---|-------------|------------------|--------|---------------|----------|
| 1 | 16.159      | 3316567          | 7.66   | 143369        | 9.64     |
| 2 | 21.284      | 39982744         | 92.34  | 1344806       | 90.36    |

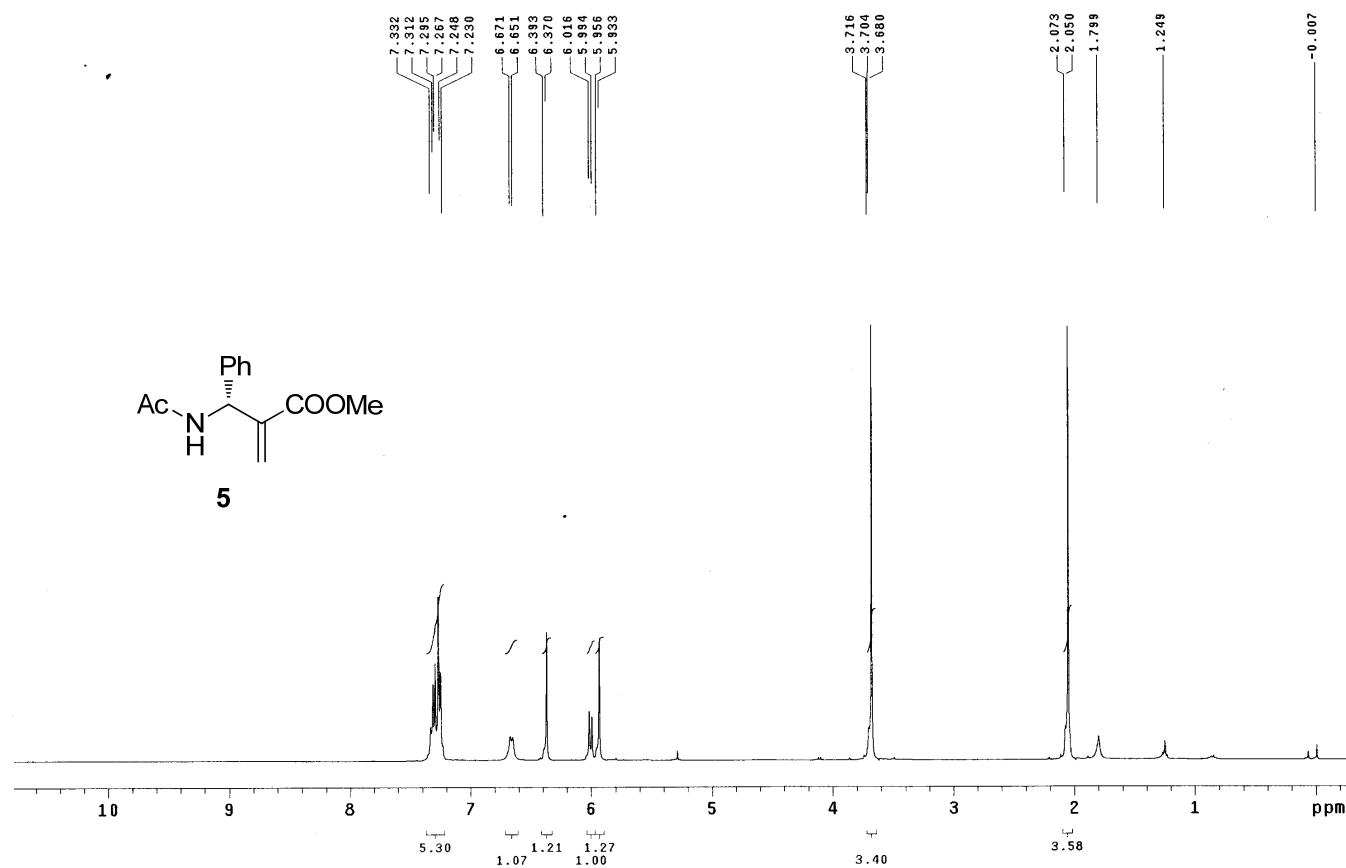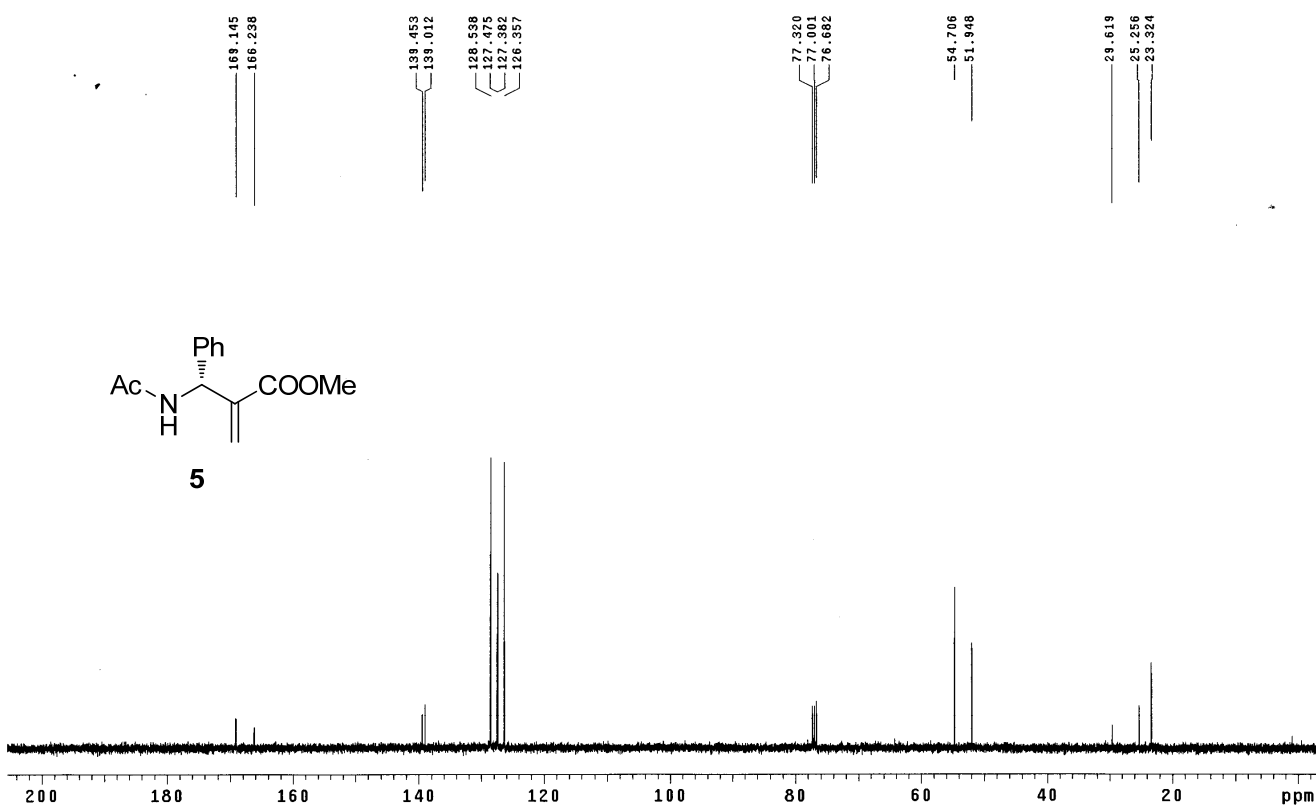

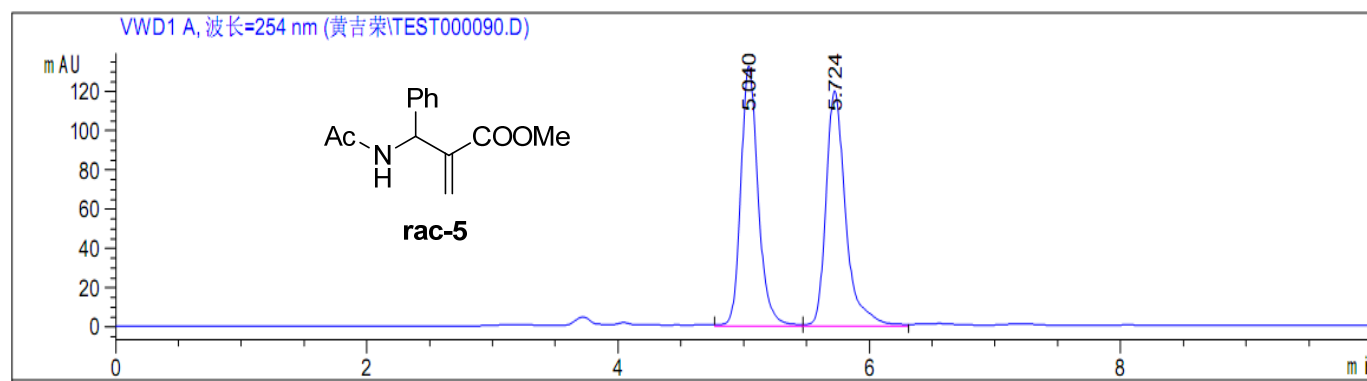

信号 1: VWD1 A, 波长=254 nm

| 峰 # | 保留时间 [min] | 类型 | 峰宽 [min] | 峰面积 mAU *s | 峰高 [mAU]  | 峰面积 %   |
|-----|------------|----|----------|------------|-----------|---------|
| 1   | 5.040      | VV | 0.1470   | 1272.63318 | 132.46182 | 49.2461 |
| 2   | 5.724      | VV | 0.1656   | 1311.59741 | 119.81437 | 50.7539 |

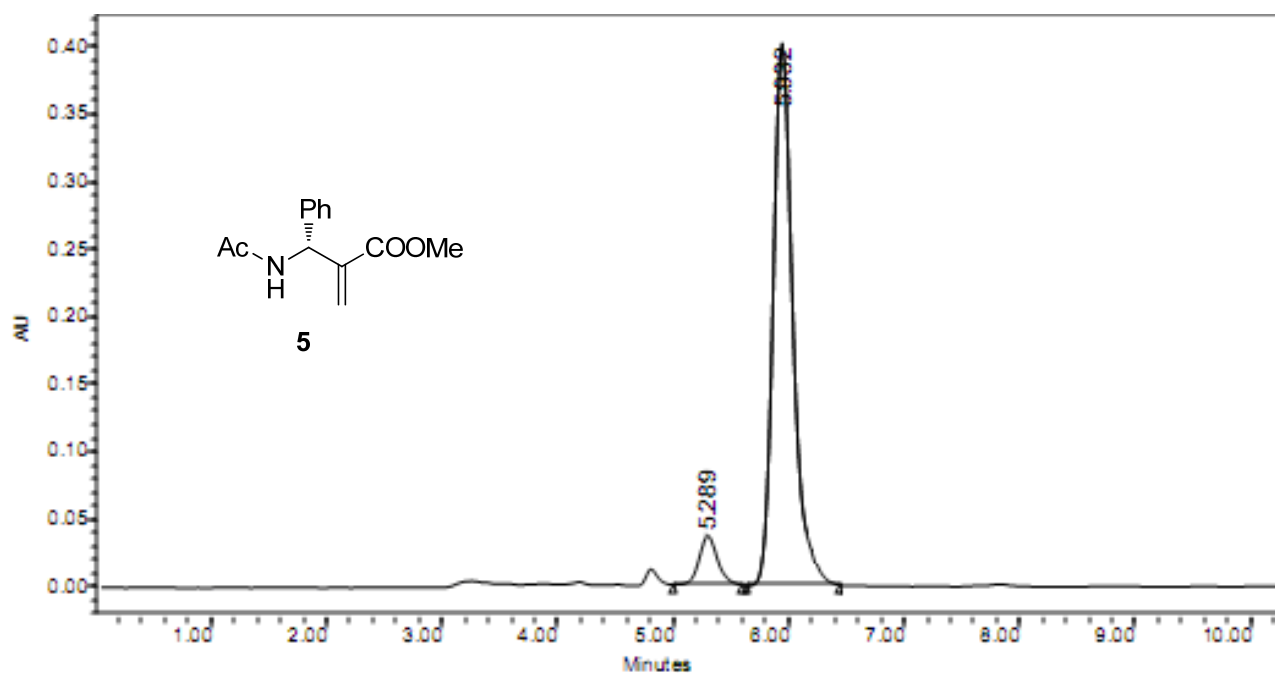

|   | RT (min) | Area (V*sec) | % Area | Height (V) | % Height |
|---|----------|--------------|--------|------------|----------|
| 1 | 5.289    | 402668       | 7.59   | 36321      | 8.30     |
| 2 | 5.932    | 4904401      | 92.41  | 401180     | 91.70    |
